# Supplementary material for: The Effects of Selected Extraction Methods and Natural Deep Eutectic Solvents on the Recovery of Active Principles from Aralia elata var. mandshurica (Rupr. & Maxim.) J. Wen: A Non-Targeted Metabolomics Approach
Source: Pharmaceuticals (Basel). 2024 Mar 9;17(3):355. doi: 10.3390/ph17030355 (PMC10974460; doi:10.3390/ph17030355)
Supplement: Supplementary file 1 [file pharmaceuticals-17-00355-s001.zip › Supplementary Information S2.xls]

## Sheet: Directory
Supplementary Information S2
The Effects of Selected Extraction Methods and Natural Deep Eutectic Solvents on the Recovery of Active Principles from Aralia elata var. mandshurica (Rupr. & Maxim.) J. Wen: A Non-Targeted Metabolomics Approach
Alyona Kaleta 1, Nadezhda Frolova 2, Anastasia Orlova 2, Alena Soboleva 2, Natalia Osmolovskaya 3, Elena Flisyuk 1, Olga Pozharitskaya 4, Andrej Frolov 2,* and Alexander Shikov 1,*
1	Department of Technology of Pharmaceutical Formulations, St. Petersburg State Chemical Pharmaceutical University, 197376 Saint-Petersburg, Russia; petrochenko.alyona@pharminnotech.com (A.K.); elena.flisyuk@pharminnotech.com (E.F.)
2	Laboratory of Analytical Biochemistry and Biotechnology, K.A. Timiryazev Institute of Plant Physiology RAS, 127276 Moscow, Russia; orlova@ifr.moscow (A.O.); frolovanadja@yandex.ru (N.F.); oriselle@yandex.ru (A.S.); frolov@ifr.moscow (A.F)
3	Department of Plant physiology and Biochemistry, St. Petersburg State University, Univeritetskaya Nab. 7-9, 199034 St. Petersburg, Russia; natalia_osm@mail.ru (N.O.)
4	Research Group of Biochemistry and Technology of Hydrobionts of Algae and Invertebrates, Murmansk Marine Biological Institute of the Russian Academy of Sciences (MMBI RAS), 17 Vladimirskaya Str., 183010 Murmansk, Russia; olgapozhar@mail.ru (O.P.)
*	Correspondence: alexs79@mail.ru (A.S.)
Directory
Table S1	MSDial parameter settings for analysis of secondary metabolites of Aralia elata extracts
Table S2	Validation of processing method MSDial vs. Xcalibur
Table S3	Extraction protocol of A. elata
Table S4	Digital matrix for secondary metabolites of A. elata analysis
Table S5	The standardization of the method using three aralosides A, B, C, previously identified for A. elata extracts

## Sheet: Table_S1
Table S1 MSDial parameter settings for analysis of secondary metabolites of Aralia elata extracts
	Analysis parameter setting for MSDial:
	Data collection:
	Ion mode: negative
	Target: metabolomics
	Data collection parameter:
	MS1 tolerance: 0.01Da
	MS2 tolerance:0.025 Da
	Retention time begin: 1.5 min
	Retention time end: 20 min
	Mass range begin: 65 Da
	Mass range end: 1250 Da
	Isotope recognition:
	Maximum charge number: 2
	Multithreading:
	Number of threads: 1
	Peak detection:
	Minimum peak height 1000 amplitude
	Mass slice width: 0.1 Da
	Smoothing method: linear weighted moving average
	Smoothing level: 3 scan
	Minimum peak width: 5 scan
	MS2Dec:
	Sigma window value: 0.5
	MS/MS abundance cut off: 10 amplitude
	Keep isotopic ions until 0.5 Da
	Exclude after precursor ion yes
	Identification:
	T/Transfer/tbilova/ MSDial_Methods_setting_files/MSMS-Public-Neg-VS15.msp
	Retention time tolerance: 100 min
	Accurate mass tolerance (MS1) 0.03 Da
	Accurate Mass tolerance (MS2) 0.05 Da
	Identification score cut off: 70%
	Use retention time for scoring yes
	Advanced:
	Retention time tolerance 0.1 min
	Accurate mass tolerance 0.01 Da
	Identification score cut off 85%
	Adduct: [M-H]- [M-NH4]- [M-Na]- [M-K]- [M-H-H2O]- [M-H-2H2O]-
	Alignment:
	Retention time tolerance: 0.15 min
	MS1 tolerance 0.05 Da
	Retention time factor: 0.5
	MS1 factor 0.05
	Peak count filter: 0
	N% detected at least one group: 70%
	Remove features based on blank information: yes
	Sample average/blank average: 5-fold change
	Keep reference matched metabolite features yes
	Keep removable features and assign the tag yes
	Gap filling by compulsion: yes
	Together with alignment yes
	1526 features

## Sheet: Table_S2
Table S2 Validation of processing method MSDial vs. Xcalibur
																						Filename	391.0607_2.90		191.0563_2.87		705.1753_6.2		515.1172_7.79		477.1784_8.53		660.2694_9.24		939.4557_11.95		777.4057_12.79		793.4367_12.81		763.42_13.02		365.2463_19.36
												Method comparison									group 1_1	PCA1664_1_1_neg	1028187	1.05761e+06	12476350	1.44131e+07	1.33306e+06	994355	4846283	5.48889e+06	189104	207468	48159	48159	303918	176694	164469	111513	226709	220515	55013.6	36277.4	23446.8	42795.7
		Pair comparisons					FC 10_p≤0.05		tR	m/z		FC MSDial	FC Xcalibur			tR		m/z	file		group 1_1	PCA1664_1_2_neg	1035494		1.52376e+07		789595		5068222		234418		NF		147312		104392		299852		39065		101309
		NADES1	ultrasound vs maceration		group 1_2 vs group 1_1		1 up 44 down	m40	2.865	191.056	PCA1664_1_1_ vs.2_1	812	961.51		m1081	13.023	Pseudoginsenoside Rp1	763.429	PCA1664_7_1_neg		group 1_1	PCA1664_1_3_neg	1109144		15525466		860408		6552170		198882		NF		78852		65679.1		134983		14753.7		3631.71
								m364	2.901	391.061	PCA1664_1_1_ vs.2_1	1343	1363.48		m1092	12.793	3-O-hexopyranosyl-pentopyranosylurs-12,18-	777.406	PCA1664_8_1_neg		group 1_2	PCA1664_2_1_neg	1027	775.667	14692	14990.1	5494.63	9990.11	2503	3264	13363.7	16060	464500	565381	249246	280058	621305	751981	73852.9	117900	23635.9	28881.3	3014.13	4602.41
								m664	7.786	515.117	PCA1664_1_1_ vs.2_1	1600	1681.65		m1118	12.807	Oleanolic acid-hexuronide-hexoside	793.437	PCA1664_7_1_neg		group 1_2	PCA1664_2_2_neg	836		15790.3		17961.9		4435		20134.1		618806		297127		730399		151096		29946.3		4871.95
								m924	9.243	660.269	PCA1664_2_1_neg vs. 1_1	14	11.7399		m1228	11.95		939.456	PCA1664_3_1_neg		group 1_2	PCA1664_2_3_neg	464		14488		6513.8		2854		14682.2		612836		293802		904240		128750		33061.5		5921.14
			vibrocavitator vs maceration		group 1_3 vs group 1_1		46 up 3 down	m564	8.529	477.178	PCA1664_1_1_neg vs. 3_1	15	22.4159		m315	19.355		365.246	PCA1664_7_1_neg		group 1_3	PCA1664_3_1_neg	199444	235583	3.23745e+06	3.28232e+06	377707	356200	929065	931253	11416.2	9255.38	383714	447571	6.37467e+06	4.9155e+06	4.99162e+06	4.46716e+06	2.87815e+06	2.95221e+06	1.11816e+06	1.22744e+06	648546	845009
								m1092	12.793	777.406	PCA1664_3_1_neg vs. 1_1	40	40.0594		m364	2.901		391.061	PCA1664_1_1_neg		group 1_3	PCA1664_3_2_neg	275029		3.65195e+06		374191		984709		7510.03		316208		3.02086e+06		4.00859e+06		2.38625e+06		1.06709e+06		984633
								m1228	11.95	939.456	PCA1664_3_1_neg vs. 1_1	30	27.8193		m1000	6.21	Caffeoylquinic acid dimer	705.175	PCA1664_9_1_neg		group 1_3	PCA1664_3_3_neg	232276		2.95757e+06		316702		879984		8839.93		642792		5.35097e+06		4.40126e+06		3.59224e+06		1.49707e+06		901848
			vibrocavitator vs ultrasound		group 1_3 vs group 1_2		108 up 1 down	m40	2.865	191.056	PCA1664_3_1_neg vs. 2_1	166	218.966		m40	2.865		191.056	PCA1664_1_1_neg		group 2_1	PCA1664_4_1_neg	92037.7	60177.9	1.20954e+06	802451	496299	469680	622142	588032	43804.7	31299	14591.7	23003.1	497.704	2957.02	459.792	487.614	42138	45060.2	NF	#DIV/0!	38728.3	29125.5
								m364	2.901	391.061	PCA1664_3_1_neg vs. 2_1	274	303.717		m564	8.529		477.178	PCA1664_1_1_neg		group 2_1	PCA1664_4_2_neg	8937.98		464618		401679		253893		36513.8		38252.5		5736.63		NF		34702.2		NF		25430.9
								m664	7.786	515.117	PCA1664_3_1_neg vs. 2_1	298	285.31		m664	7.786		515.117	PCA1664_1_1_neg		group 2_1	PCA1664_4_3_neg	79558.2		733195		511062		888061		13578.6		16165		2636.73		515.436		58340.3		NF		23217.4
		NADES2	ultrasound vs maceration		group 3_2 vs group 3_1		1 up 27 down	m1081	13.023	763.429	PCA1664_7_1_neg vs. 8_1	85	90.706		m924	9.243		660.269	PCA1664_2_1_neg		group 2_2	PCA1664_5_1_neg	3461.13	3254.46	15774.9	23557.9	NF	#DIV/0!	3526.82	4466.9	12897.8	9547.19	173394	153243	1.20392e+06	1.15331e+06	1.18182e+06	1.18476e+06	200570	251318	48663.4	56664.1	11195.9	58989.8
								m1118	12.807	793.437	PCA1664_7_1_neg vs. 8_1	1418	1527.08								group 2_2	PCA1664_5_2_neg	NF		11882.9		NF		2552.92		6479.82		123517		1.21305e+06		1.36171e+06		261846		67738.6		60777.7
								m1092	12.793	777.406	PCA1664_8_1_neg vs. 7_1	15	18.9501								group 2_2	PCA1664_5_3_neg	3047.79		43015.8		NF		7320.97		9263.9		162817		1.04295e+06		1.01074e+06		291538		53590.2		104996
			vibrocavitator vs maceration		group 3_3 vs group 3_1		33 up 3 down	m315	19.355	365.246	PCA1664_7_1_neg vs. 9_1	13	15.4537								group 2_3	PCA1664_6_1_neg	4999.19	4999.19	17030.9	23405.2	21670.2	38834	NF	9090.26	7758.12	11612.1	862353	606360	1.54629e+06	1.6331e+06	590364	552161	163288	165515	33901.6	45496.9	26173.9	19748.4
								m1118	12.807	793.437	PCA1664_7_1_neg vs. 9_1	81	67.4867								group 2_3	PCA1664_6_2_neg	NF		27883.5		70162.4		7909.43		9711.53		385650		1.3019e+06		442919		154112		42502.4		1071.34
								m1092	12.793	777.406	PCA1664_9_1_neg vs. 7_1	72	59.9958								group 2_3	PCA1664_6_3_neg	NF		25301.1		24669.3		10271.1		17366.6		571076		2.0511e+06		623199		179144		60086.8		32000.1
			vibrocavitator vs ultrasound		group 3_3 vs group 3_2		30 up	m1081	13.023	763.429	PCA1664_9_1_neg vs. 8.1	23	21.0256								group 3_1	PCA1664_7_1_neg	206973	250695	4.2971e+06	5.58304e+06	1.07893e+06	939893	2.24452e+06	4.59481e+06	143175	160521	183740	140832	162975	150462	21720	15355	5.06926e+07	7.32408e+07	5433522	7125388	1122219	1.60198e+06
								m1000	6.205	705.175	PCA1664_9_1_neg vs. 8.1	19	17.9888								group 3_1	PCA1664_7_2_neg	293400		5.67227e+06		887813		7.69622e+06		172428		118289		161165		2031		8.96166e+07		8682428		2134870
								m1118	12.807	793.437	PCA1664_9_1_neg vs. 8.1	18	22.6279								group 3_1	PCA1664_7_3_neg	251713		6.77975e+06		852934		3.84369e+06		165960		120465		127245		22314		7.94132e+07		7260214		1548838
																					group 3_2	PCA1664_8_1_neg	2921.02	13207.8	727070	663143	74261	95330	572235	451961	5314.86	3991.82	10494.6	71143.6	527286	411963	250934	290979	34247	47961.3	60588	78554.7	617507	915172
																					group 3_2	PCA1664_8_2_neg	32108.5		863609		108727		618096		1397.22		73630.2		246109		288187		29100		118204		929485
																					group 3_2	PCA1664_8_3_neg	4593.82		398750		103002		165552		5263.37		129306		462493		333815		80537		56872		1.19852e+06
																					group 3_3	PCA1664_9_1_neg	312438	282754	7.34075e+06	6.72657e+06	1.74392e+06	1.71487e+06	4.03347e+06	4.62474e+06	9298.52	6480.99	67832.8	115158	1.00322e+06	1.25874e+06	837298	921235	1001678	1.08526e+06	1.62586e+06	1.65166e+06	151520	103663
																					group 3_3	PCA1664_9_2_neg	246905		7.35101e+06		1.80397e+06		4.77752e+06		1691.45		124743		1.69479e+06		1102135		1227966		2.17769e+06		107642
																					group 3_3	PCA1664_9_3_neg	288919		5.48796e+06		1.59672e+06		5.06323e+06		8453		152898		1.07822e+06		824272		1026143		1.15143e+06		51826

## Sheet: Table_S3
Table S3	Extraction protocol of A. elata
Sample code	Aralia raw material	Solvent composition	Extraction method	Molar ratio of components	Component weights (per 20.0 solvent)		Raw material weight	Extractant weight (g)	Dilution of samples in water (g of extract dissolved in 3 ml of water)	Volume (ml) of solvent for dilution in 3 ml of water	Volume of the extractant , L	Sample concentration, g/L	Volume of water to dissolve the samples	Dilution coefficient	Final concentration, g/L	Coefficient of normalisation
					Component 1	Component 2
1	batch 1	Choline chloride:Malic acid	maceration	1:1	10.2	9.8	0.5	20	2.02	1.63	0.02	25	3	0.647948	16.1987	0.978183
2			UAE				0.51	20.2	1.98	1.59	0.0202	25.2475	3	0.653595	16.5017	0.996476
3			VAE				4.04	160.84	1.96	1.58	0.16084	25.1181	3	0.655022	16.4529	0.993534
4	batch 2	Choline chloride:Malic acid	maceration	1:1	10.2	9.8	0.51	20	1.95	1.57	0.02	25.5	3	0.656455	16.7396	1.01085
5			UAE				0.51	20	2.07	1.67	0.02	25.5	3	0.642398	16.3812	0.9892
6			VAE				5	200	2.11	1.7	0.2	25	3	0.638298	15.9574	0.963614
7	batch 1	Sorbitol:malic acid	maceration	1:1+10% water	11.5	8.5	0.51	20.03	2.05	1.6	0.02003	25.4618	3	0.652174	16.6055	1.00275
8			UAE				0.48	20.01	1.96	1.53	0.02001	23.988	3	0.662252	15.8861	0.959305
9			VAE				5.02	170.42	2.07	1.62	0.17042	29.4566	3	0.649351	19.1277	1.15505
10	batch 2	Sorbitol:malic acid	maceration	1:1+10%water	11.5	8.5	0.52	20.32	1.97	1.54	0.02032	25.5906	3	0.660793	16.9101	1.02114
11			UAE				0.51	20.3	1.98	1.55	0.0203	25.1232	3	0.659341	16.5647	1.00028
12			VAE				5	200	2.39	1.87	0.2	25	3	0.616016	15.4004	0.929976
															16.5605
Solvents						ND1	Choline chloride:malic acid								0.909003
						ND6	Sorbitol:malic acid							RSD	0.0548898
	Legend			Legend for meausurements
sample number					files
1	batch1	choline chloride:Malic acid	maceration	group 1_1	PCA1664_1_1_neg	PCA1664_1_2_neg	PCA1664_1_3_neg
2			ultrasound	group 1_2	PCA1664_2_1_neg	PCA1664_2_2_neg	PCA1664_2_3_neg
3			vibrocavitator	group 1_3	PCA1664_3_1_neg	PCA1664_3_2_neg	PCA1664_3_3_neg
4	batch 2	choline chloride:Malic acid	maceration	group 2_1	PCA1664_4_1_neg	PCA1664_4_2_neg	PCA1664_4_3_neg
5			ultrasound	group 2_2	PCA1664_5_1_neg	PCA1664_5_2_neg	PCA1664_5_3_neg
6			vibrocavitator	group 2_3	PCA1664_6_1_neg	PCA1664_6_2_neg	PCA1664_6_3_neg
7	batch 1	sorbitol:malic acid	maceration	group 3_1	PCA1664_7_1_neg	PCA1664_7_2_neg	PCA1664_7_3_neg
8			ultrasound	group 3_2	PCA1664_8_1_neg	PCA1664_8_2_neg	PCA1664_8_3_neg
9			vibrocavitator	group 3_3	PCA1664_9_1_neg	PCA1664_9_2_neg	PCA1664_9_3_neg
10	batch 2	sorbitol:malic acid	maceration	group 4_1	PCA1664_10_1_neg	PCA1664_10_2_neg	PCA1664_10_3_neg	outlier
11			ultrasound	group 4_2	PCA1664_11_1_neg	PCA1664_11_2_neg	PCA1664_11_3_neg
12			vibrocavitator	group 4_3	PCA1664_12_1_neg	PCA1664_12_2_neg	PCA1664_12_3_neg
				QC1-QC5	PCA1664_QC1_neg	PCA1664_QC2_neg	PCA1664_QC3_neg	PCA1664_QC4_neg	PCA1664_QC5_neg

## Sheet: Table_S4
Table S4 Digital matrix for secondary metabolites of A. elata analysis
				group_1_1	group_1_1	group_1_1	group_1_2	group_1_2	group_1_2	group_1_3	group_1_3	group_1_3	group_2_1	group_2_1	group_2_1	group_2_2	group_2_2	group_2_2	group_2_3	group_2_3	group_2_3	group_3_1	group_3_1	group_3_1	group_3_2	group_3_2	group_3_2	group_3_3	group_3_3	group_3_3	group_4_1	group_4_1	group_4_1	group_4_2	group_4_2	group_4_2	group_4_3	group_4_3	group_4_3	QC	QC	QC	QC	QC
	Average Rt(min)	Average Mz	Metabolite name	PCA1664_1_1_neg	PCA1664_1_2_neg	PCA1664_1_3_neg	PCA1664_2_1_neg	PCA1664_2_2_neg	PCA1664_2_3_neg	PCA1664_3_1_neg	PCA1664_3_2_neg	PCA1664_3_3_neg	PCA1664_4_1_neg	PCA1664_4_2_neg	PCA1664_4_3_neg	PCA1664_5_1_neg	PCA1664_5_2_neg	PCA1664_5_3_neg	PCA1664_6_1_neg	PCA1664_6_2_neg	PCA1664_6_3_neg	PCA1664_7_1_neg	PCA1664_7_2_neg	PCA1664_7_3_neg	PCA1664_8_1_neg	PCA1664_8_2_neg	PCA1664_8_3_neg	PCA1664_9_1_neg	PCA1664_9_2_neg	PCA1664_9_3_neg	PCA1664_10_1_neg	PCA1664_10_2_neg	PCA1664_10_3_neg	PCA1664_11_1_neg	PCA1664_11_2_neg	PCA1664_11_3_neg	PCA1664_12_1_neg	PCA1664_12_2_neg	PCA1664_12_3_neg	PCA1664_QC1_neg	PCA1664_QC2_neg	PCA1664_QC3_neg	PCA1664_QC4_neg	PCA1664_QC5_neg
m1	19.03	118.942	Unknown	39239716	6611500	37888684	18137204	14257971	6975967	39755360	17986964	19233260	19050828	11696962	6819549	17286984	20078252	21646946	3715449	13172439	44905168	4306426	3776029	3701461	2153828	16974700	8374545	6626108	11345605	9598255	7503461	8462688	40664380	4791143	5061031	7483806	22832744	10551732	6336520	3282958	5820835	37951720	740702	1980411
m2	18.838	118.942	Unknown	6683655	37326816	33086924	5119792	31976260	6687492	12670120	14708575	13319939	13945874	3410812	7139034	14997754	409849	16854038	5006554	2212292	7042647	4226410	18503186	19321004	3248327	11887478	2505960	1709292	15688777	13315718	7942640	38409508	9590664	4541288	5220904	19134402	22835082	17719278	10384518	25165124	35546956	10748198	32214828	23763484
m3	5.344	119.051	Unknown	401617	539127	511976	621299	772497	441793	429948	196716	482679	279300	393323	414778	500695	434097	318283	657614	346313	406376						150932		19925								225054		25740			141554	326228	266339
m4	5.114	121.03	4-HYDROXYBENZALDEHYDE	3765240	7599685	5002835	830006	630126	244723	781553	1431650	1382093	2677216	2285264	2689024	623211	152887	313244	411802	534485	2381298	781187	563363	739768	46641	12335	234269	519824	30453	64355	140902	284418	105570		171051	74251	61019	8494	36999	1722366	1057961	1184196	1499131	1100087
m5	7.711	121.03	w/o MS2:Unknown (carbon number 7); PlaSMA ID-32	3956154	6202164	3892470	4945922	3811206	6772176	5936184	4089434	5149742	5531891	4654568	4249092	4739159	6178598	3990102	4134458	5628664	5368194	2504286	2609345	3193102	3109168	2289226	2373374	3145140	2011355	691165	353462	1383650	1719157	2648120	2426616	2798765	2579172	4099961	2915120	3776841	3166822	3137074	3493322	3393232
m6	8.274	125.097	Unknown	3320142	3987690	3012214	279821	166678	453789	657283	817445	887255	447487	784692	793527	99663	105321	101190	140271	159531	190366	1072242	1332084	1234322	335855	90406	130478	1737087	1537195	1699505							281985	145455	329211	1052545	1131419	970767	857686	930100
m7	18.447	126.949	Unknown	1348543	416156	1998070	760496	896327	238787	268660	1180596	523525	271910	1195419	148844	339177	201973	191336	525305	474613	136218	1125227	243131	1919428	124061	384159	856362	271433	896453	622721	576950	132514	289311	526378	1731138	434179	1039124	526991	290949	172537	2017294	242567	2356497	1036008
m8	7.756	132.022	Unknown	985564	1526400	1287937	275790	44844	204407	39428	320046	18698		58182	84370		44688	41879	314760	128293	31774	53079	13515	76717	69110	16441	37645	269777	198032	78474	90863	213699	39428	1937		163085	67837	95446	39370	329008	150009	284361		75303
m9	7.797	135.045	Unknown (carbon number 8); PlaSMA ID-67	7884829	9970132	9296049	697309	753944	949433	2007207	1921182	1817107	1343655	845634	703554	1188644	274699	775394	640990	751080	1155504	1181314	2098906	1965322	520697	473106	304342	2451459	1636572	1584997	4760			355751	310525	439136	229807	612712	639196	2109989	2802102	2292791	2205932	1385528
m10	4.626	135.045	Unsettled: Caffeic acid; LC-ESI-QTOF; MS2; CE	25023704	25952788	31662148	180184		51917	4657806	4796988	4103357	1906122	1455690	1881884	143190				76955	433909	4327672	7379409	6579913	456525	375356	133109	4705024	4821772	5602466	92711	12401		496442		240748	100497	1458877	1164944	4400864	4775052	5295686	5322176	5431109
m11	5.191	137.024	w/o MS2:Unknown (carbon number 7); PlaSMA ID-73	3623084	4116596	3230474	2794238	3152545	2804080	2797532	2712815	3534525	1841850	2601086	3339510	2823997	3306013	2505731	1723322	3103317	4308382	2720122	2789978	3041470	1284175	669626	1038469	3877989	1334401	921271	2872320	234773	1173132	1249206	880235	1010663	391678	1107393	1701972	2394900	2230352	2248953	2070488	1682065
m12	3.034	137.024	Salicylic acid	19350598	22831648	21567258	1219078	1178035	1162066	6552782	4604978	5969141	4655446	5830720	4445238	2784506	1713406	1265501	1367326	1352917	2213938	10790818	7743570	8531525	2766576	2405241	6425450	7260564	9261579	6767466	554496	189923	899912	1411230	3672037	3814188	8672903	3138218	3361630	6024824	7112452	7381968	6572656	5944309
m13	2.309	143.035	w/o MS2:Unknown (carbon number 6); PlaSMA ID-83	6983268	8485839	10518441	10679692	9860628	9078378	12419373	11116733	9354126	7943174	10086062	9435702	9271597	8967190	9636670	11427285	11046580	9236800	6696359	5558559	8104977	4892876	5226529	4311362	5252278	5103964	4574128	5068946	1043562	3953993	5031291	4068552	5352592	4070166	7277741	5230897	5827680	6709866	7665865	8312824	7533903
m14	7.887	151.04	Unknown (carbon number 7); PlaSMA ID-103	3345959	7125596	6250682	4249442	2425434	3699698	2094741	2480790	2768694	2178945	2959916	3463616	3042896	3816304	2680809	3370229	2858783	4019410	2121364	2262803	2306847	1662010	952080	1119317	657316	874284	404746	189543	335391	233652	1217184	1724811	1901409	871370	946385	1556212	2619109	1856528	2824721	1958054	2027930
m15	6.577	151.04	Unsettled: P-Anisic acid	5585600	8377828	7390814	1539074	2050856	2865100	2287993	1577320	1841767	3406952	3114407	3485090	2642297	1312917	1169253	1379341	2142881	1725003	1843658	1767688	2796864	1565942	785204	806297	1240162	1119717	1158205	251807	329717	690673	1048455	843468	1163673	723572	941078	1646873	1885099	2561533	2252788	1662438	1959402
m16	7.306	153.056	Unsettled: 2,6-Dihydroxy-4-Methoxytoluene	7357802	10250602	7570090	10041826	8347004	8939532	8259458	11165838	7934610	12046980	11375787	11056355	8578957	10391181	8714522	9089136	10763175	8968997	3036564	3269903	4257958	5202843	3827990	5242982	4798949	3546482	3410870	955918	1446700	901993	3839311	4536694	4188500	3286272	3881758	3985585	6975150	8452072	6900614	5381716	6343962
m17	5.254	153.056	Unknown	19931580	23175490	21301882	20664848	22226812	22104842	25347976	23672124	23480466	20122190	22615832	23585218	22050878	27200120	23140318	21420864	23254952	24460936	7023036	8458355	8276154	8843289	6874472	7831536	8126383	9514764	7166670	2842790	595870	379380	8309821	7919353	9190087	7662579	10190998	9441086	17699456	15708693	15688478	16378064	13476387
m18	3.279	153.056	Unknown	10824741	12542972	14016660	13550606	14260840	14698704	15096524	12579458	14501191	15339962	13621289	14878577	15480599	14029157	14239979	13939977	14652283	14461513	5167288	4749236	4916688	5502712	5489548	5576414	5118534	3869237	5035194	1346098	925865	2358650	5241496	4267026	4981926	5305279	5374706	4833229	9206783	9613798	8443203	8516226	8996982
m19	18.104	158.925	Unknown	5428319	3584846	1465058	6587172	2269403	4142822	4397414	1164145	15479784	1549731	8372976	3655582	13941441	3780855	8756044	2199655	1315960	3610436	4288566	4292718	4726496	2949402	1908405	1252126	1192484	4192105	8392304	3709484	1713810	2480704	1829084	4687582	1194136	3449680	1137597	5880543	2239305	2162648	1442558	1476870	1367130
m20	17.069	169.834	Unknown	19964290	23357754	11842944	2527527	3984578	2032551	2668902	14133023	3306368	2564826	1924257	22742594	2270102	2080807	2456001	1677743	3100046	2174991	5149999	1561671	1883206	664450	6634992	4354067	5457518	5507867	15155467	5457736	5302881	14698810	1473578	1464738	2276178	4308848	489390	2813722	3230443	4802476	8212887	9423753	3626443
m21	9.12	171.103	Unknown (carbon number 9); PlaSMA ID-161	218310	1704753	4846509	250516	284180	681024	826505	1122002	790006	1269224	1838349	1681188	227741	247604	136349	194294	650902	827140	39618	51970	67562	9984			107146	91138	63697		94241	162364	14275		39705	15346	51400	10570	28058	18754	18940	14151	46368
m22	7.173	173.082	Unknown (carbon number 8); PlaSMA ID-173	3948980	5364599	4190209	1538616	1697459	1834165	1849003	1750482	1567043	1908041	1932411	2571632	575078	667311	709343	1018230	1445666	1207741	1949774	2119532	2655942	1169734	656292	949897	3307533	3163516	3358213	608736	831241	906076	397012	624103	878640	521135	1110651	1012672	1855712	2013948	1471591	1468668	1175476
m23	2.647	174.046	C7H13NO4; PlaSMA ID-178	3044237	2295777	2856191	5184312	5462577	13986434	6518109	18095698	7062098	12312459	6401328	13326519	15505658	5029720	5914286	17876374	13216491	13600677										27560	46991	90240				162370			5233183	1688900	2459822	10946993	2513668
m24	2.449	174.046	w/o MS2:C7H13NO4; PlaSMA ID-178	9760148	3351955	5666741	5815929	19294642	2340771	21230418	4088165	21584522	12312459	6401328	13326519	15505658	14534546	18444972	17876374	2256208	3191808										3062	11747	90240				20298			5233184	4312100	9377264	9951685	9115929
m25	4.771	174.046	C7H13NO4; PlaSMA ID-178	5786770	6796709	8508729	10624285	11047711	11068506	12649602	14200648	12593032	9407159	9321074	9994492	11433832	8706186	10280449	11037810	10593852	7048772	74598	112210						11119	23375		2592								2588615	3998276	4120421	4326776	4427892
m26	4.763	176.043	w/o MS2:1-Isothiocyanato-4-(methylsulfinyl)-butane	3695192	4067612	5794578	7236048	7282352	2541777	8786721	8212515	8085106	6390458	7303436	5885695	7285440	6081782	8461609	6321325	7230147	4635518					8398	9880					37738								427465	3159173	2836617	2964590	2579644
m27	4.381	176.936	Unknown	1101416	1249118	1088008	663257	4620040	1332599	4114314	361179	1295895	1965761	1104477	2522771	1168857	1540975	2687374	2082789	1231117	2590894	927593	1592383	487827	2545004	2796932	412674	1782411	1783627	2370760	642544	3668688	1670932	729426	969091	794442	442459	1466067	2308276	3765928	429528	622658	381950	861529
m28	4.878	177.019	7,8-Dihydroxycoumarin	57777440	47289652	62328440	2368359	2096922	2440520	17638720	13502280	18056870	8639404	10855137	10538180	2103370	1957042	1921598	1929380	2367104	2327573	32051818	26487732	30588476	2798540	2639209	2735596	24688964	27876570	27232094	1453968	584290	536540	2426661	2074554	2347504	4024416	6079808	6556870	12884791	14372319	14263563	16123009	13773645
m29	8.163	177.056	4-Methoxycinnamic acid	2773316	4059328	3311786	410436	634155	684898	436061	521547	164338	504982	836841	974637	633954	863757	315084	533994	663989	241631	783520	857097	824790	134505	83728	212403	384754	201926	238058	67365			131327	304122	76878	12618	492213	335843	1088566	810009	711105	521307	549918
m30	8.895	178.027	Unknown	698369	1008713	732416							227151	178805	208015																										92567
m31	2.664	178.04	Unknown		22021	38587	1209414	286816	1528326	1494709	1600245	1502975	461932	102110	246201	1055939	882903	1359744	405784	1054402	1093159	3753							25772												107470	22840		26603
m32	4.768	179.035	trans-Caffeic acid	35970540	38496184	47566428	870311	615433	1597131	6775522	9789714	6104685	4745059	920435	1027712	1240812	1833694	1103909	861465	869776	906076	6283496	13246160	9854038	1730292	1642665	1340672	9285755	8632734	9482892	907153	500066	953496	1728637	922464	650437	649882	2996760	3070440	6695318	8174433	9076850	9785204	8686191
m33	4.652	179.035	trans-Caffeic acid	42101512	44791924	54321744	713169	790976	348167	8784955	9789713	7752411	4745059	1753144	4105382	189093	649791	1103909	245032	822005	480438	7440792	15169916	13021457	2312030	2102049	1689740	11340031	9960826	12127430	955655	180812	1116470	1813375	815068	657240	337880	3669055	4084634	8854251	10056371	10592593	10857677	10947415
m34	11.701	183.139	Unknown	4156135	4557004	4526981	4003438	4409888	4921000	4426089	4120513	4308708	5107610	4576236	5269544	4680280	5261110	4483592	4283259	3974299	5039077	1544358	1399878	1460684	2122744	1269779	1550828	1827083	1232913	1478640				1844008	1793920	1500282	1161888	2324150	1925655	3877141	3580223	3178951	3069456	2739063
m35	4.812	184.074	Unknown	752519	1365716	911241	1143853	922262	2081483	2143290	2547086	1646945	1297104	1627085	1759063	1327193	2319712	1535081	1643880	2082084	1996446	627205	588034	471962	941604	439014	235390	461696	403482	729427				241924	290481	657798	278293	994115	240210	619312	381345	231266	474396
m36	6.828	186.113	Unknown	1203629	1138961	970722	672336	605027	482316	605299	585326	438068		92032	116500					185758		328972	264392	192899	408157	253737	306484	579646	1109374	1293310	225590	104028			136793				134243	595176	490701	396867	258375	379060
m37	2.784	187.062	Unknown	5696706	6805748	7799268	8404426	9179890	9071198	9949996	8911088	9917247	8376146	7883214	8835028	8754917	8818981	8852844	8691729	8112869	9108277	1306703	1181445	1385253	1115071	896996	1574663	1145868	1147945	489182	38342	2419	61957	1244491	840748	1225496	956234	1242743	1331610	4425215	4808028	4669418	4319012	4458638
m38	8.273	187.097	Azelaic acid (Not validated); PlaSMA ID-221	51051008	58094544	50671956	7786626	5708675	10379857	16334510	13641198	12364822	11214066	11774376	15150007	4615980	4819251	5576479	5471322	5813246	4791046	16026337	20057184	23139910	7096628	5219430	5936894	27472988	29395216	30682028	4680169	3233894	3637354	3657801	4148007	4618920	5102272	5836309	6513934	17134852	18213376	17494930	16237997	14135266
m39	5.217	189.033	Unknown	117202	461878	257915	455086	526986	645543	847603	589036	774088	338522	511671	280494	508469	488655	598631	757477	485811	382988	11685							211050		15252	29489			10510					83436	141721	200006	304068	225742
m40	2.865	191.056	Quinic acid	261021760	307618240	268630144	757708	145152	128675	62952464	64318932	43861968	19998350	7189824	12207387	488394	545704	316787	134698	960443	505597	63580080	83748584	83287352	12200682	15310704	7921807	88454968	98595368	100885712	1174783	813568	412994	7375252	1809656	2883150	4723814	17149760	18290794	49081768	55872432	52492124	53801556	48882972
m41	6.445	191.056	Unknown (carbon number 8); PlaSMA ID-240	39222444	37023832	39603424	264254	612778	829187	12945263	12787362	12277115	3595678	3680560	3735511	1019999	1510064	1121786	680733	1327525	1120775	18774004	18024588	15814972	4005623	4868349	4148324	20345610	26006720	22353494	355114	995644	245537	869139	2151385	943054	3332679	3621977	4275691	8719784	9825500	9502636	10876314	8914831
m42	5.34	191.056	Unknown (carbon number 8); PlaSMA ID-240	88028312	84123016	99028552	624786	131056	2607	20164430	22941198	21578108	5800346	3239574	4818238	596319	591572	587205	503921	1203710	245567	22409432	30964674	24641498	4792888	6074656	4597259	30037268	30354708	37802888	719815	517876	496586	2915552	1780693	1520031	3065950	6540660	6172252	15202511	17498258	18822148	21912776	20282002
m43	8.896	193.051	trans-Ferulic acid	4281228	6007746	5994650	20324		192827	300041		267284	1559392	1690746	1294951	162178		151046		175009	83940	412775	461382	175195				251041	38691	87565								60137		473745	773786	400093	382180	326003
m44	4.81	194.104	Unknown	513330	1679166	629323	529300	582014	1033413	2203387	1497374	890028	783468	1286906	1081439	926224	1809400	879977	402408	1209017	1769679																			304095	692065	203530	101390	269433
m45	7.299	197.045	Harmol	32675268	32597082	34844196	40338436	39872960	45753108	45513600	37965156	40016668	35911108	35237980	34091604	40067144	37002356	45963328	35632668	35283708	43319680	11969899	14124063	12916970	13575915	15009665	15758415	13659687	16079813	21118176	7423382	1090138	987457	18132160	17941954	16826300	14530169	15929904	15570776	27229846	30449014	33053188	28039538	29607852
m46	5.54	205.014	Unknown	382047	103381	122005			1306289	1264993	1393608	1270408	153099	1239919	427835	101143		1312284	83718			1333644	870629	849918		208453	142416	301963	834419	641717		1437225					272449	235461	165130	152843	206329	606773	456361	421393
m47	6.481	205.051	Unknown	1343955	1776519	1640683	1810616	1692018	2260965	1444580	1477909	1318124	2055860	1860186	2036896	2111866	1674574	2116797	1922787	2082957	2037299	288235	238146	431076	209209	218311	320578	410933	320933	333110				389554	450302	570201	498227	480187	475266	946699	1283598	1043566	958325	903921
m48	5.613	207.066	Unknown (carbon number 11); PlaSMA ID-275	1886171	2806367	2665192	3223251	3166150	3201274	3265486	2858338	3963368	2407546	2727021	2488642	3423912	2690155	3578722	3309627	3021246	3375898	104444	79759		44		2685	110747						168042	12826	75910	79828	1585		1022288	1384472	972519	1385274	970093
m49	7.69	207.093	Unknown	854152	1934807	1545832	2206256	11101797	13817939	147799	516222	363775	1734861	1887997	3710821	120341	501405	129662	638089	647962	894093	661541	897774	858758	117773	60605	174106	1528254	2109788	2113082	2563395	3163257	3750362	3090740	3120734	4432484	4160	10047	151291	2487880	2522240	2634046	1989562	1753079
m50	5.869	213.077	Unknown (carbon number 10); PlaSMA ID-294	1841222	2550140	2463499	3282885	2783122	3676844	3756388	3589770	4028795	1153554	4443609	4278075	2793356	2768889	2344881	4018418	3614305	3070830	972080	633978	1609157	2076474	1572279	730083	482321	697881	1896758	657291	254510	910088	1395353	1389863	2010669	999442	805352	780156	2309815	3356960	3001203	2024753	1486649
m51	3.925	213.077	Unknown (carbon number 10); PlaSMA ID-292	4036176	5294588	5304440	4764035	4999173	4575372	4364384	4090149	5084241	4587310	3989276	4501811	5466282	5356895	4674838	4843538	4028110	4720646	1745510	1878045	1393990	2049965	1543104	1833165	1335564	1385988	1507133	1028098	106508	103195	1550036	1545196	1835761	1497975	1491910	1930171	2966383	3389011	3316778	3316144	3036792
m52	3.378	215.056	w/o MS2:Unknown (carbon number 9); PlaSMA ID-302	11754387	12900855	11316830	11757052	12162325	14982267	12874113	10752849	11807808	11628917	11085397	11430334	11228928	11234808	12791644	11714915	12620802	11659329	2888387	2766232	2747743	2216369	2978778	3244179	2335062	3330747	3354094	77085		10569	2763662	3559316	3142621	4404520	2760913	2654920	7469425	7432749	9008382	9516802	7569044
m53	3.252	221.045	w/o MS2:Isofraxidin	3658608	4170376	3850900	35347	69306	4592	34230	5359	34878	247989	4405	231903	20707	37816	61458	6719	6016	90955	1581426	1787220	4426767	495484	1174956	2302448	669445	1847502	655540				7321344	2610895	1589581	5762650	321226	1625927	785856	634894	811901	3017352	3018998
m54	7.423	221.045	w/o MS2:Isofraxidin	1912851	2795437	2075596	2533790	3044114	3050412	2232009	1300779	1804929	2275185	2545774	3210252	2981506	1142704	3422034	1961835	2322630	2031179	1797680	1009243	1765716	171590	1834316	3689729	1144276	709609	599176		14697		1775735	702832	2009288	4159268	870549	818542	1192356	1711049	1938246	1698382	1711947
m55	12.753	221.154	Unknown	592809	283880	282884	2019053	1570345	1802933	1524352	1789075	1723422	1082201	710946	1980944	1159668	999093	1186331	964549	1359450	1245281	640559	1029421	1838517	465563	422126	373202	311669	304018	429693	3241041	3848501	3186250	859211	361700	285684	149738	513970	641053	1120919	1257878	1221099	1129985	1025218
m56	5.602	223.025	w/o MS2:Unknown (carbon number 10); PlaSMA ID-321	5037140	8256126	8718866							533563	410833	230128				24254			26966							3457											177530	134154	178778	291053	139157
m57	4.996	223.06	w/o MS2:Unknown (carbon number 11); PlaSMA ID-324	3450186	4405284	4183503	4470988	4515228	4558185	4258898	4157950	4056764	4648698	4613887	4641808	3979487	3510817	4565874	3922038	4640050	3827238	567154	342726	298332	523786	627362	505158	535554	313074	610536				729320	399688	588020	433502	737843	676559	2309196	1786899	2052415	1975544	1751965
m58	2.948	223.061	Unknown (carbon number 8); PlaSMA ID-327	9916227	12332638	12595896	12364931	13736163	12382609	13911185	12210900	13236300	12491728	13116474	12782920	14187520	13699464	13651841	13042830	11457845	13066650	2586012	2765414	2495040	2217328	2357268	2456356	2030870	1999790	2234528				2081461	2580216	2228114	2540732	2615608	2340150	7649168	6931508	7411609	6933880	6403152
m59	4.497	225.004	Unknown	601731	432250	976126	1329890	1896046	2615711	861158	605649	1255629	899023	2028934	1528112	2536608	2306318	2524290	3205562	1200371	1776435	80091				2169			34445	23909										607346	631954	876151	946800	841339
m60	3.271	225.076	Unknown	14840647	14415251	16984420	18968302	24404810	20065786	19812786	17179546	21672272	19219938	15465189	21727344	20819098	15293501	23378780	19823492	15719716	17162658	2569526	2470535	2314796	1974504	3126547	2731616	1236201	2285113	2189430			52689	1957788	2310462	1833084	2808216	1789323	2138190	7353149	11221738	10134774	12042988	13429838
m61	4.624	225.076	Unknown	13389626	14530066	16684536	16311435	17517704	16955860	18322090	14834018	17732148	14515183	16361677	16671254	18980686	16042840	19692360	16991386	13893138	16603745	2901648	2952052	2994667	2634956	3625744	3012087	2963698	2157446	3116462			14323	3219401	3586496	2864537	3221495	2453928	2575694	8089284	9147702	9455856	9401032	9613824
m62	5.631	225.076	Unknown	48078296	55756616	57253692	68541928	73588440	72555600	78608176	70736536	79867040	68010800	68528392	68963688	74702240	67614496	77710384	71865872	66336292	67149624	10261096	8237692	9582375	8977595	3290737	8476380	5146578	2897566	9467060	189911	99872		3272259	6242980	2996342	11407893	5915312	7575953	31700334	34341164	35515264	37062304	33447862
m63	8.522	225.112	C12H18O4; PlaSMA ID-332	5244520	4712950	5243824	86406	218223	583429	1087118	894801	1230101	720298	242537	483851	312024	151435	126457	113139	135206	296070	1074442	1292629	1431704			349910	1472461	1408569	1364211	183616		27969			25006		186145	88268	644840	1526944	1106651	1296950	1236009
m64	16.409	227.077	cis-resveratrol	32380418	79532392	64249648	14464481	13238439	6316638	22796280	33096758	7604200	21835452	27656666	9263750	13228029	47186124	4006766	26206424	53175064	24050756	285284416	150687104	77596728	178490688	125098544	121963552	207309904	89972352	107604824	16485872	44258692	22891670	148114384	200326144	153092304	121018224	354963296	105371152	130974648	57309592	106859664	44955428	151785056
m65	11.825	227.128	C12H20O4; PlaSMA ID-334	85103240	101725952	92602520	100138632	96051464	109187664	112352424	98726552	98332832	101246168	108621352	116581032	104666384	113844752	105191040	95634384	108541520	111980096	38485448	36866688	38907800	49526468	35724112	38652980	44097512	45791508	42496576	355360		285729	42174760	39931668	43563204	39140912	53215544	49235772	83960784	76058800	73359168	68254352	60407824
m66	11.725	228.132	Unknown	10215472	12611074	4850824	12376342	12353124	5041154	5864471	11749291	5096087	12667783	13194781	6188970	12980551	14094171	5094184	11910024	13118792	13816628	4758366	4364990	4315926	6881798	4221960	4557076	5262243	6089643	4803140				2497284	5046847	5543979	4975854	7089220	5905404	10713286	9966121	4054979	8580572	3345923
m67	5.229	229.072	alpha,beta-Dihydroresveratrol	1798308	1389233	2630623	2762039	2504468	2270281	2594343	2729493	2788000	2990280	2103363	2603968	2717432	1904016	3497246	3044670	2327374	2173353	1512532	1203327	2073721	2719000	2074130	4324962	4819400	6301695	5766450		306880	169273	4981956	7043932	6417012	4590566	4764112	4160440	1063721	2272533	7563060	4183620	5394433
m68	3.284	229.082	w/o MS2:alpha,beta-Dihydroresveratrol	4252296	2119950	2141654	1454634	5062582	4691385	2699773	864443	7311643	3638582	3222690	3243689	4942475	4443552	2917166	3789300	2305215	5116298	5654708	5363742	3711118	2576998	5109646	16302748	17371070	3657377	4220292	131880	176317	174256	6689163	5968396	17464142	9180003	20734126	5746125	5234486	4350338	3961181	2714867	4197662
m69	18.337	232.939	Unknown	5850760	4415574	3781182	23044476	8594097	4863288	5654465	4784174	5633056	3862637	3228521	2933079	4962830	3271355	4618905	5618844	7586270	5025960	23500694	24419006	14107998	4431432	8358634	8691425	4073682	6154864	7490144	6366970	2127416	3139763	31726122	8926579	6473360	9223009	4032782	14012401	1382941	2567547	5916934	7091102	8213170
m70	7.3	233.023	Unknown	4719356	5765566	6893622	7951066	8977170	7729834	6269579	8135571	7560366	7408396	8142133	6269326	7809208	6158257	10613429	8906788	7646116	6164338	1618364	2271376	1069048	853041	2362765	2406852	997508	1521708	1741720	38445	531639		1645989	1502572	1492122	2613250	885343	1514344	2471149	3771436	4996920	5237804	5892404
m71	5.865	233.103	w/o MS2:Unknown (carbon number 13); PlaSMA ID-350	1247765	3921	10556																4494742	4101529	3920870	3887469	3624664	3886943	3833269	4472761	4151285				3902331	4013299	4194284	4108004	3892818	4450368	2084616	2006245	2359328	2588220	2181736
m72	7.061	233.107	w/o MS2:Unknown (carbon number 13); PlaSMA ID-350	328535	116234	31271								3216								1864456	1958666	2208231	2250625	2230533	2812924	1767432	2548336	2284437				2857098	2727506	2831160	3121879	2406883	3010472	996487	1048514	1548649	1595846	1019258
m73	15.895	233.155	w/o MS2:Unknown (carbon number 13); PlaSMA ID-350	1153987	1058434	995121	906991	802832	1214329	1280427	836543	1112060	1272712	871488	878204	979922	1019454	925224	940863	653902	606649	718215	535237	648841	323389	517804	612644	728575	913650	433931	613685	938081	828720	650820	695360	638716	954418	863334	618222	1111759	516264	717780	721557	608908
m74	7.309	235.019	Unknown	879678	821530	974901	1641403	1620921	1287012	1168375	898134	1138452	1289704	1427638	1091028	1468104	893225	2064324	1356717	881202	1000083	262089	195652	405675	166333	322413	426775	138193	334186	270704				114054	211971	425402	303508	179240	270264	300186	840184	643586	755172	768686
m75	4.859	236.069	w/o MS2:Unknown (carbon number 12); PlaSMA ID-355	1641873	1793285	2004847	2608651	2769456	3089531	1453319	878489	1078829	2625742	2894334	2323331	2752560	2649653	3036432	2836218	2378617	1989228																			362676	306320	566523	563220	251975
m76	12.77	236.106	w/o MS2:Unknown (carbon number 12); PlaSMA ID-355	738724	186868	392789	3090949	2485178	2427923	2254292	3055774	2483018	1813952	1136560	2918492	1557080	1249491	1943698	1167685	1974953	1777616	1090439	1546698	2300437	605187	733162	616279	474927	605011	634428	4942781	5488107	5129802	1110790	459737	614576	438455	756014	661413	1477729	1760742	1713622	1373952	1281114
m77	5.22	237.076	Unknown (carbon number 12); PlaSMA ID-359	12788906	16081067	14529337	15475485	15999535	17628120	15686055	14966806	15785050	16583623	16912152	16618569	16336684	17471418	16787496	16523901	15884474	16796134	4844652	4820426	4257514	4440568	4184315	3614749	3266978	3726387	1852283	4726	5492	1078	3490296	1864868	3335154	1788850	5136602	4289826	10171600	9391336	9608203	9182466	8765037
m78	6.332	237.077	Unknown (carbon number 12); PlaSMA ID-359	8532115	9865964	10633841	11756432	12001449	11943714	12524634	11487534	11579388	10529183	12352648	12064792	13345384	13297162	14215171	13167087	11559160	12106928	3172704	2665900	3520990	3460184	3254293	3590332	2617574	3466754	2718561	5639	8497	13819	2928538	3360283	3360272	3587622	2696840	3703697	6644834	7570281	6352766	7001320	6465518
m79	18.562	238.892	Unknown	786927744	669179584	82616560	87201816	91242016	84518096	85996368	106887960	88469192	930000256	809606464	119639680	947653824	782765888	1000243264	90110592	110437072	751170432	583775552	63178156	88682464	530230464	73785024	71724352	526593920	67729928	56169100	882497792	31123970	79318864	66898448	735638464	35975096	705310336	537345728	533991424	289058784	632852352	60330956	767721280	79650176
m80	5.592	239.056	w/o MS2:Unknown (carbon number 11); PlaSMA ID-362	6310151	6910508	9168211	5811846	8547793	8274850	9317914	9997183	11741175	7637259	7421222	6682992	8449758	7527104	8358500	7491078	5892020	6392025	2738291	2522651	2326142	3747356	2699064	2997811	1910682	2601924	3611659		81408	24756	2642008	2549865	2768044	2772428	2591890	2896357	3444900	4761630	3927310	4748641	5339409
m81	6.212	239.056	Unknown (carbon number 11); PlaSMA ID-362	4644082	5609069	4748686	7606687	5322596	5846257	7988738	5870080	6272740	8107000	5178802	7810138	5682768	6156375	6805204	6513036	6781032	7528058	1357202	1186753	1058064	1485234	1211247	1378055	1265565	1546475	869675			11003	1757991	1381098	1532508	1792457	1265843	1240814	3634311	2902865	4670992	4528100	2745156
m82	3.599	241.035	Unknown	6608605	6867671	8448900	16839838	16843084	15064907	15252345	13755696	15036870	18549498	8753852	17340576	16074613	12117805	18371120	16122681	12003973	11881447	3150952	3601666	2431783	1998560	5974782	4850189	3065472	2801315	3824466	54834	43365	7857	4591804	3233555	4273307	4635130	2865434	2468736	5873406	8037548	8673893	14119322	10004088
m83	3.296	241.072	Unknown (carbon number 10); PlaSMA ID-367	9213537	9573947	10219913	12397254	12107511	12520827	11983710	10804764	12051003	11479376	10645114	10554764	12839586	10697543	12090170	12568414	10545728	10437075	3119036	3426160	3721343	2648593	5111182	5023946	2338242	3382501	4336358		11394		4123033	3730238	3608062	5949084	3147311	4015391	6079795	7552317	7696206	8510589	7522036
m84	6.463	241.072	Unknown (carbon number 10); PlaSMA ID-367	6968598	2736548	8018700	9412450	3824491	9061250	10264003	10174010	9900093	9117729	9064831	3712936	4023130	2977082	10041910	8830271	8659695	3180083	2354676	2577386	2143258	2438210	2795630	3619187	2264194	2873072	2665880				3137628	3127580	2761768	2900594	1035746	2772682	5320010	5773549	5452872	6106420	5368849
m85	8.564	241.109	Unknown (carbon number 12); PlaSMA ID-368	14850974	13899822	16012742	310811	653485	1079456	4336148	3402780	3856176	2850519	2579920	3599605	589615	401747	908968	854277	435872	842878	1603471	2486893	2437104	280938	315159	405274	3520578	2692464	2721931	197341		4082			130666	524266	307959	303083	2584628	4209659	3367777	3866072	4213666
m86	6.454	243.087	w/o MS2:Unknown (carbon number 11); PlaSMA ID-373	6410550	6576140	6718348	8974071	9502906	9729199	9564048	8813361	9915949	8142442	8846062	8648566	9602492	7609064	9686055	9487653	7912112	8597837	2324722	2199880	1603716	1656929	2157018	3002865	2020973	3266480	2957573				3496676	2700445	3232802	2345524	1424124	3598391	5066712	5225958	4712306	5685723	5550632
m87	8.836	243.123	Unknown (carbon number 12); PlaSMA ID-374	18913830	18238150	20793208	819386	2181180	2579078	5769776	4643742	2788375	3760384	3561746	2036764	1384155	779989	2973600	1018360	743703	868850	2217650	2089547	1906463	320693	1234908	408669	6012508	2912594	6976354	233769	132568	24828	201879	164462	796019	1150368	352968	266977	1615861	2148241	2242865	2003556	1821276
m88	8.648	243.124	Unknown (carbon number 12); PlaSMA ID-374	18889642	17909278	20347338	2311036	2872276	3541393	6719088	4643741	6066890	4480568	4336310	5611913	3247588	2512385	3846430	2795263	2222180	2768590	5682506	4997848	4719584	808686	1234908	1187683	6012508	7912770	6976354	662880	259386	88264	611263	687634	796019	1150368	1011303	883318	4405554	5785450	5638978	5085884	4320666
m89	8.639	245.14	w/o MS2:Unknown (carbon number 10); PlaSMA ID-385	6651562	7154236	8196901	7893774	9454142	9563818	9091137	8193862	9609965	8350438	8962086	9542028	9746299	7431095	11083879	9347395	7322396	8432932	2907056	3205300	2991102	2449874	3059954	3339881	2664040	3386620	2861922	75371	14272	18832	3756485	3029825	3001056	3708882	2593914	3259194	5394176	6630464	6603752	6661580	6124492
m90	11.941	245.14	w/o MS2:Unknown (carbon number 10); PlaSMA ID-385	55918796	53908736	60183680	68146408	72917152	75395432	78709896	63096888	67584128	67765240	73224240	76506720	69707264	66175672	74768544	61847516	65584248	69455504	26368980	27037786	24749760	27999548	25648244	26290550	25733672	27844636	27152888	278859		72919	29516098	27185076	28576298	27629404	31438430	31443882	41411856	43230636	45913380	43216156	37752304
m91	10.673	245.14	w/o MS2:Unknown (carbon number 10); PlaSMA ID-385	13271354	4440822	8786032	7943115	11566633	19237266	10556212	12086859	10655710	8555339	10403162	19414660	13871340	10080946	20838776	17377264	8182923	7207520	2536148	2357961	2754712	3089354	2686467	2584578	2894426	3424588	2878451	29711	131382		2878318	2799136	2671021	3011192	3329158	3448689	6946994	4670822	7682854	9260764	6891900
m92	4.885	246.098	Unknown	1262899	1671256	735159	114476	539175	533259		169167		434866	304047	675222	102726	587836	416417	333344	634307	805053																			95143			98760
m93	11.522	248.08	Unknown	801339	72278	127233	1836851	1452901	2816948	211718	88800	226514	1349701	1409830	2213430	1342150	1708404	2492496	1755488	1606268	1953695		76588					76678		104979	139860	95444		364480	111827	211680	194547	154306	217921	483982	271706	230702	424309	414727
m94	4.259	249.004	Unknown	13989		748	3467	149955	141691	625305	455927	587117	3703	3780	18727	1563	1142	5842	986		41127				31393	422677	153022			291578				153028	346896	354562	263380	80701	133778		202623	109208	132021	201329
m95	5.566	249.025	Unknown	78532360	67796552	84813544	61361380	270658496	253348672	41572872	37183488	197987344	58297332	92524800	246165376	287719264	46275436	112109040	259652880	46462512	84414096	4213174	4079060	15637880	3577738	23389952	22565624	2900263	17555518	3907813	53893			5101594	19126666	4320876	17960586	12648024	10306600	41633708	30888736	35815008	39019692	64768096
m96	5.8	249.025	Unknown	191919760	172079248	218149232	255736624	59918356	58475656	186536288	176227216	46700076	248855024	251226048	58998856	63015272	208902400	299793568	60219068	205015152	214773488	20325978	19206602	15633677	16017396	23373330	22534360	12705352	17537888	18903270	10455			20601676	19113758	19654762	4165672	6772468	3166419	104684200	143644048	158961616	168858368	173370720
m97	7.379	251.092	Unknown (carbon number 10); PlaSMA ID-396	14317043	17621130	15405294	20074926	20880796	22383336	19401528	18223442	19200298	20481174	20040064	20867686	21823358	21035942	21933684	20402664	21454156	21167346	7115854	7294080	7034538	7855116	6527206	7402758	6535055	6752706	6517560	41304	83314	22281	7671190	6697519	7694292	7930624	9115512	8193238	13669731	13951736	13599206	13030070	12036986
m98	6.1	253.071	w/o MS2:FA 9:0 + 1O, sulfate; PlaSMA ID-416	6194980	6595983	6683931	3505716	3002882	5478344	6442563	5745304	5628680	4981892	5344339	6796835	7575525	3005837	2893465	5319303	2957751	2174292	1289530	1423190	1214449	644216	557244	695348	1803824	1266754	2591543				486183	893303	1027257	742717	1108802	154302	1894288	2111079	2330330	1920446	3698510
m99	3.701	253.071	Unknown (carbon number 12); PlaSMA ID-415	7150204	7280564	8365068	4536554	5649444	4828720	6241106	7337644	8946849	4602908	4134520	8274368	9681233	4642432	9588123	4780673	4681106	4825924	1345756	1172136	1048648	456440	918351	1066508	1237610	712111	1368246				960580	890078	798698	841404	603930	1053661	3864819	4704558	2981598	3595746	2912959
m100	8.499	253.107	Unknown	2424450	2196122	1044105	2547782	3766101	3687811	3591090	2171669	4556832	3854498	2959684	1323686	1560815	3543925	3698285	3223870	1009084	4484656	163704	694334	539641	321885	164206	130089	422301	134545	175916				307994	281708	609007	242666	424145	253444	1335632	628431	1664592	1999746	458688
m101	11.795	253.145	Unknown	1676018	1586074	1604734	805196	1255371	1160995	1665020	889997	1067626	1557522	1508013	759845	585806	1718483	972538	629548	654386	699926	156005	35163	145820	804808	498239	146606	598421	157561	799701				568453	103485	136368	68707	346024	700095	1349447	1326181	998061	418108	601320
m102	4.86	254.08	w/o MS2:Unknown (carbon number 11); PlaSMA ID-419	20630882	22049452	26959850	33738084	35469924	39981384	34134128	30509016	29408816	34471884	35838656	35481472	36604212	34394476	39506688	35427608	37093592	28262860						12042				216827		4927							8195878	9097557	10782493	10034901	8686226
m103	6.445	255.051	Flavanone base + 2O; PlaSMA ID-421	6799957	5151304	6689298	9854448	11367186	10928412	10596806	8859176	11319941	9677538	9952188	9710774	11646717	6687819	11480131	10827922	7285846	8824016	2002818	1594803	1096974	1046961	2800150	2574434	1864565	3010451	2404638				2789330	2733627	2744459	2905963	1005453	2575783	2556720	4796130	4457383	6587875	5473018
m104	3.379	255.088	trans-pterostilbene	35074020	40060988	39890876	45279284	46316312	48729752	53341396	47148464	49153128	44626112	44223008	46658436	49418116	44182068	52078844	47132024	43436416	41009236	7498484	7299672	6776890	5042613	6178061	6365086	4181428	5078338	5543592				5476584	5505514	5040396	5321908	5110471	5369609	21875172	23702216	25372980	25536610	23643176
m105	4.855	256.077	Unknown	5798049	5978538	7447846	9838245	10402246	11767465	9741450	9296656	8444381	10046760	9400613	9570656	10250303	8579981	11721906	9428222	10707666	8969149								363		14239		98171							2068820	2556411	2733747	2798126	1998234
m106	3.463	257.03	w/o MS2:Unknown (carbon number 14); PlaSMA ID-426	947220	795388	1432199	1689962	1775283	1714592				1730186	739622	1287718	1806850	901040	2042229	1362983	1104644	1117703																			249831	462287	192774	711943	604181
m107	7.747	257.056	w/o MS2:Unknown (carbon number 14); PlaSMA ID-426	57986876	71589528	59923192				7318038	8755446	4698716	2623564	244891	895504					947		3482017	9039453	9752498	1607900	1277724	189428	13521370	10724340	9793852				291317				1737412	1008862	10871729	9832654	10473064	8277996	8791448
m108	2.931	259.038	Unknown	2590575	2523096	3039718	2284610	3304103	3226240	2968728	2785852	3459687	3247730	2978528	2852512	3871862	3082517	4090875	3400421	2705036	2706014	301203	88552		179426	504026	308249	98817	44833	125925				144248	8572	205408	513926	331048	92714	887894	1551831	1281951	1660570	1450446
m109	18.507	260.874	Unknown	21028466	20521432	22336708	24372476	8219344	7855040	22553042	5459434	4949220	18966544	15572595	24390416	21571436	2642678	7604710	4939266	6200290	6943396	6243567	4681972	5407248	1920477	35658640	18914032	12154314	19345908	6145893	19887572	2892112	31513888	4832574	27550132	5443736	26956706	14922340	4564630	19343810	2520633	17700384	18971148	26153888
m110	18.166	260.874	Unknown	4800156	6146338	4556554	6270914	7841079	54423784	3459987	32538672	3236211	35046512	3868444	7018306	3378893	4012073	32131422	3273124	27299320	54725256	40773720	2220556	2026737	2864396	6596608	3662692	2874156	3949334	21883508	4551019	16084918	7830155	3669373	6542126	19572104	6586275	2914334	32466594	4949702	9846548	13404105	3112290	7140054
m111	17.931	260.874	Unknown	46722108	3573296	3001596	3073566	6139206	50472256	43172364	29470388	18085440	35046512	29858462	6938839	38047528	24820248	28156324	45648260	6312326	6774886	6127947	6568246	4982708	7903695	6202714	2431780	4939967	16224608	4890713	4438720	16084918	7407656	21636014	6302029	5174565	6344095	1857689	4977656	2405709	4778116	13404105	19922746	6830318
m112	3.278	261.053	Unknown	8155121	5511250	8466529	10472830	11467833	10193535	10479309	8310930	11950589	8875249	7120500	8764752	10961601	7138985	13934272	10079706	7259962	6635767	15632913	11762901	10109871	12317315	12927491	18336946	6650396	8838806	14080450		1263726		9889570	8739472	10239940	8800571	21574430	15669276	2525334	4222734	4731766	6402940	6409654
m113	6.219	261.138	w/o MS2:Unknown (carbon number 12); PlaSMA ID-434	2140542	616644	2066124	6321813	5887351	4147416	4380462	2290592	3707375	4636664	4155044	3068802	5083643	2455327	5477780	4169174	3168724	4374010	756804	1737408	1067909	713226	2728574	1495204	1056664	1339253	1214214	5661022	7520190	6397324	1870637	1853676	1184556	1700594	1122549	972252	1620540	1510045	1667754	2741956	3335268
m114	3.243	263.05	w/o MS2:Glutamyl-S-methylcysteine; PlaSMA ID-435	2406869	1868581	2642816	3740258	3891017	4158053	3451335	3221491	4079522	3479737	3088822	3125888	4039242	1927854	4445012	2986348	2938718	2889081	253367	328283	114875	89041	374754	110380		102431	168749				197283	168824	158487	234907		108582	1649546	2977359	2840434	3469265	2670554
m115	11.661	263.105	Unknown	5448958	5006570	5859394	6414307	6721920	6715698	6268865	5598636	6611642	6411076	7190638	6973145	7657035	5911399	7604519	7089170	6082586	5756605	1074585	1361086	1283570	1183494	2100745	1992789	1458059	1634770	1649760				1909010	1969836	1889615	2309452	1148667	1854306	3263558	3905250	3869722	4290928	3627518
m116	6.095	263.135	w/o MS2:Unknown (carbon number 14); PlaSMA ID-436	79663	91101	94008	887410	788394	812066	91229	182239	544859	119221	254790	153614	866762	30446	433234	301566		104362		30752	169597		10710	2720		118588	115386	462540	1312560	956144	215917	25090				251130		150084		283089	431365
m117	4.83	264.108	Unknown	2400256	4979881	2829081	3452930	3311323	4896852	4525522	3883665	3147463	4496502	5086568	4930017	3585988	6722490	3792229	3366506	5642738	5364516																			2129897	1606967	1223158	658645	679456
m118	6.751	265.072	w/o MS2:Unknown (carbon number 12); PlaSMA ID-438	2202153	1427137	2335648	2079360	2602655	2289005	2041422	1753188	2075187	1862327	2146588	1645234	1951474	1984276	2609626	2339484	2271682	2312986	363860	367749	216457	192490	254886	336943		240695	313568	11311			385802	165758	481463	501295	139864	294895	464933	956557	1061335	701667	628926
m119	11.649	265.103	w/o MS2:Magnolol	1317754	1232050	1471628	1716090	1999562	1539875	1258471	1508561	1472562	1621434	1741732	1915329	1941027	1187244	1974890	1662092	1273601	1646635	415998	315982	238245	245226	163756	220387	141212	198665	251173			4107	551475	165347	257445	178961	253038	475850	591644	666651	1030461	922024	904230
m120	13.624	265.147	Magnolol	34212144	33518878	24288894	9225722	9565626	11820655	18686560	25125726	25889584	9470729	11843629	13286666	14130097	13177438	12294092	8884766	11067358	10827649	5089937	10120668	9641019	3433460	4786822	4515064	10975062	8863686	9356888	10113359	8348569	4420200	3986623	3572214	2862077	4343838	3260151	2450880	6213916	12758621	9713687	8157652	7413924
m121	6.42	267.087	w/o MS2:Unknown (carbon number 16); PlaSMA ID-454	6276752	6672631	7276118	6553056	9479650	8810289	9043670	5701700	8701881	8617674	8871705	6898170	7060508	7939773	9504293	9485415	8586711	8447974	1472253	514304	1546782	1265771	1976389	1472901	1515942	1968572	1154299				1625251	2645983	1538787	1768936	2414674	1516128	4485397	4906138	3793345	5350410	4971026
m122	7.791	269.067	Unknown (carbon number 15); PlaSMA ID-460	5939150	16858578	18018620	23301988	29073746	27397022	24758818	22622204	27587730	23980238	25210018	28731894	11600932	25767480	30742030	25587728	27436004	27512824	6153104	6035554	5269215	4556954	7486078	7628696	5368526	7520063	6713026				7547630	6911616	8889458	8093858	4920004	6427513	11156545	16194941	14953788	6471514	15346171
m123	6.608	269.102	w/o MS2:Pterocarpan base + 1O, 1MeO; PlaSMA ID-469	6520771	7971841	6311801	9749152	9029939	8633926	12069302	8031962	11776791	7633462	9432572	9351838	11349700	9386352	12703778	10909071	7715728	7579389	6465841	2157666	12448721	6911811	3590356	14606821	2979122	11915442	5766497	70399	99773	51975	4936022	10433759	8334346	7896790	6252755	5274785	4946992	9030304	9671347	5065407	10487337
m124	3.25	271.083	Naringenin	1970542	2549070	1891433	2114815	2721414	2782616	2971008	2893540	3056096	1815588	2360285	2430606	2558231	2908321	2865317	2898366	1970153	2657446	155198	161824	854301	544077	134381	1201338	300591	235217	46447		5995		326147	446826	699187	290236	300314	224116	845102	1249010	1464441	1054674	959498
m125	6.165	271.167	Unknown	549224	1859940	1463815	2410870	3695823	3574550	4434846	2385732	2811262	3728728	2373124	3107542	3062450	4229202	2600571	2431514	2495748	1169592	1648179	2213958	2082467	2805193	481142	1974941	2492404	2317220	1522023	5255057	6678094	7457050	2751625	1789578	1409115	1846811	2999814	1849475	2726982	2236288	2945416	1930000	1615562
m126	4.831	272.046	Unknown	939007	675630	1389580	1773782	1483894	2091042				1566356	1509270	1619131	1824177	1038935	1947634	1360649	1514679	1179482																				299780	188680		142848
m127	6.337	273.054	Phloretin	1324250	1269845	1598769	1705499	1972599	1948103	1855370	1681600	1400086	1390148	1730080	1663208	1682348	1379258	1762148	1990598	1448474	1787232		265546	102636		129467	589386	172496	267057	298220				120264		332510	197015	94885	220221	557565	489274	1088091	1157905	561974
m128	8.041	275.113	w/o MS2:Unknown (carbon number 15); PlaSMA ID-484	2279434	2570470	3697884				412325	388501	561736	239810	288510	414302			93574				693840	519716	579903					324917	197047	259332									344948	532919	429165	472317	233714
m129	13.879	275.168	Unknown	1326258	1353812	808657	332083	379826	327511	8828475	10054923	14906226	380867	392309	205423		786921	261681	30285	342216	101149	2712756	4799783	5385910	724605	318888	460746	4982922	4894330	4443655	353234						22363			651287	745138	283667	508628	130959
m130	6.935	277.072	Unknown	5423440	6846414	6151832	7624372	8909555	8405042	7584002	5944060	8574419	6484534	6274203	7933308	7055496	7794276	8743231	6933700	6506458	7929838	1086376	1057336	1088030	547548	919557	1380838	534031	794042	753083				1233651	996883	1760396	1244527	1094124	1445419	3581925	3944565	4161402	4595786	4459805
m131	15.001	277.145	Unknown	160892	587920	344398	1354002	1477826	1490283	2546228	1901915	1942768	1310751	1547507	1385961	1781060	2068574	1869106	1407843	1797160	1974186		215329	276443	179042	278526	232220	102900		157876			10430	217253	231437	229100	80301	321811	265144	1039382	976810	949711	744053	721683
m132	19.662	279.233	Unknown	110586		146067			3830	10759	209731	133161		242504	85402					80300	484896	11172	910165	750594	113145	24469		298400	1390728	679306	94821	267470	215506	13468		241027			2858	132061	109313	107308
m133	3.284	281.066	w/o MS2:Feruloyl Lactate; PlaSMA ID-497	5712787	5919404	6297416	6966793	7054298	6958423	8016206	6239009	7995880	6585824	6595698	6922977	7597178	6174914	8545046	6933793	5766825	5876395	1126314	857917	1281764	643102	1461872	1588602	638243	1148647	1254614				1198542	1257960	776745	1895661	1035731	954694	2810921	3731299	3594576	4335936	3812822
m134	12.053	281.116	w/o MS2:Unknown (carbon number 14); PlaSMA ID-498	4094213	2811791	3900824	4795596	5407316	5637116	4894064	4071548	4408013	5290786	4858186	4564204	5482224	4115357	5875318	4911568	4386680	4160208	1568619	1346060	1023553	979918	1942866	1750442	1431035	1328868	1893371				1989933	1686581	1907174	2160990	1242743	1585487	1865347	2348678	2927358	2687140	2707993
m135	10.062	281.139	Unknown	174355	1242358	2085828	1397462	1672296	1871362	217004	94191	87079	2635656	3401239	3068988	1599240	982385	1620326	2028849	1413695	1542109	211055	90473	28732	22948				134328	92112	45156		113994	38957	31474	32927			34389	47745	106146	50435	74038	150993
m136	2.654	282.082	w/o MS2:Guanosine (Not validated); PlaSMA ID-499	197695	509474	686255	1030403	2535960	4615402	6465743	1216668	3485938	698012	2919470	1535563	3200303	4192144	2234006	2473761	4981400	677861																	72044		899305	1252945	471230	726796	1116166
m137	2.91	283.045	w/o MS2:Unknown (carbon number 16); PlaSMA ID-503	1874083	2298734	2363715	2209242	2473830	2090936	1850556	2587974	2255000	1967647	1957284	2315614	2350584	2684859	2263704	2088784	1927777	1793438	623987	433322	649882	598806	739586	538854	770718	751719	820956				641002	1049540	1032241	743863	1140584	642320	758652	1361903	1175673	1375112	1416779
m138	12.04	283.112	Unknown	1309198	816369	1105902	1518192	1621696	1705376	1648987	1648628	1478692	1597967	1619629	1478174	1489929	1122790	1812140	1400723	1137730	1146086	390105	450561	358610	145023	493580	586952	421135	394753	242662				539743	552238	318154	379994	433895	577952	460355	727862	999580	901789	673514
m139	5.473	285.017	w/o MS2:Cyanidin	693626	553748	1122497	1174935	1135872	1106000	865405	987606	973987	902527	990101	1079183	1285746	932771	1344043	1400480	1108792	1086319					190280														321011	386788	520454	447816	459452
m140	2.621	287.077	w/o MS2:Eriodictyol	40015604	47940944	46629368	49589212	53869324	50234728	61069140	55748072	64811724	54444360	41242224	47691244	58155460	46663048	59572712	53330236	45574984	49344956	11119309	8097256	11153218	8838016	9715826	8298621	2537486	7878411	7695521				7807668	8007604	8924234	10421602	8427662	10419023	29671890	31998580	34242088	35728088	34412788
m141	8.078	289.073	w/o MS2:(+)-Epicatechin	1010370	1395422	1629936	1109938	331385	1508202	471544	331279	1058100	802508	271807	1684972	225222	346260	1698313	460686	1339684	756884	488578	498502	561216	45318	11130	30434	3469	66637	16655				530	218493	2609	8058	6626	44325	571026	828459	474008	171459	531547
m142	8.866	289.128	Unknown	1699251	1474004	2429914					179115	142120	213405	281094	365792							205768	147670							125779											99640	118629	233449	88129
m143	7.676	291.016	Unknown	319044	163326	322466	534689	695547	541913	169561	194411	301876	274748	583238	767166	476994	626246	618460	693718	631462	615522																			199715	144814	145247	199181	175807
m144	7.786	291.088	Unknown	921191	1767618	1829048	1524123	2393815	2260228	1899262	1957661	1942782	2194891	2120412	2520937	2599423	2203172	2478646	2253805	1678125	2356036	12095	133608	21654	10409		27665	206993	29351	18733				116707	235994	211957	190819	126013	168724	608058	1218285	1094591	319550	936281
m145	7.299	293.067	Unknown	2419422	2851966	4262694	682114	1601778	1689049	684487	1568692	1893600	851124	1873962	1565378	1858736	1471450	1807602	1391455	1402269	703400	427826	667851	220046		11968		473823	561242	394046				21736	181962	76445	70417	10372	2702	1345757	1066974	1192095	2030736	888457
m146	2.584	293.124	Unknown (carbon number 12); PlaSMA ID-551	639878	117997																	717309	393610	1104970	369039	315409	755218	1254609	1261056	994742			88556	846879	1284934	759685	794240	706522	1054331	522005	860538	519796	550560	853231
m147	12.691	293.176	Koumidine	3102793	1559312	1656923	6120037	6080080	6108474	8988659	10335164	7292124	3324218	3249757	6120986	3837108	3446370	4627616	3070030	4178656	4068178	4595989	5959620	7249926	2490243	1786642	2299342	3163858	1505581	1745935	8363249	9459449	9281529	2643126	1575094	1525458	1155200	1835928	1926846	4716304	4357008	5027498	4589089	4254695
m148	13.643	293.176	Koumidine	1607082	931942	732254	4283053	4183490	6258212	3588846	2770646	4741624	2163583	2738472	4684912	2515043	2956732	3802500	3866892	3741332	3771836	3224204	3041796	4175124	1560109	1312591	1538122	1427866	2407170	1952745	5535794	5546334	7117392	3193999	2633734	3084040	1776142	1544908	2881728	3009882	3329234	2952578	3143725	2322087
m149	12.489	293.178	Koumidine	3095354	619814	1656923	1742297	1845544	1744634	4084112	4392194	16424053	1070650	969797	1511640	1093349	943202	1386259	828595	992498	1067598	5023556	6804066	6255370	1063984	1653491	2180562	3631156	5426361	4575221	2052107	2202596	2191335	706614	548059	511650	349888	498091	620141	4381876	4048708	4623958	4296250	3885491
m150	15.348	293.179	Koumidine	7048394	8080924	7128562	3699118	4323334	4744158	5799663	6050788	5970338	3792728	3753165	4023355	4116644	3472634	4802356	3896530	3039993	3006046	3266112	4670190	4798450	1965983	2941731	3178246	4746962	5609996	5117097	3590990	4439786	2712223	2957432	2687921	2880354	3207185	1855582	3114546	1251584	3691353	3807340	3437730	3476249
m151	6.358	295.082	w/o MS2:Unknown (carbon number 14); PlaSMA ID-567	7288145	9552543	6537970	9378409	9968063	8431649	10261433	9131802	8297170	10765829	11509948	7826791	8518289	7879195	9022484	8911881	7431547	8264308	1206241	587068	1211082	420109	2130334	1980786	1381004	1349347	1137183				1510594	2014336	1729375	1986247	1526007	1740634	3685118	6441144	5567494	5294135	6524645
m152	8.351	295.119	w/o MS2:Unknown (carbon number 11); PlaSMA ID-570	1457374	1654102	2066745	1557866	1841321	1901008	1549684	995279	1738072	1612441	1800123	843835	2129467	1825016	2112734	1958083	1961612	2235899	170577	84425	190799		105403	62388			185763				10379	294389		357088	3402	88456	604025	843706	293142	1184114	616963
m153	15.84	295.227	Unknown (carbon number 18); PlaSMA ID-572																				2500					649063	1690539	992089
m154	2.966	296.15	Unknown	334008	1342793	1019571	1845877	2195581	2318347	1308119	848687	1346777	2120204	2096720	1789044	2231141	1948687	2621140	2197043	2260854	2131502																				103604	98489	79588
m155	4.749	297.082	Unknown (carbon number 17); PlaSMA ID-580	126750336	28804856	8342561	5676334	759637	652981	4106326	4429864	1771543	5573094	2602696	2674312	626219	5816155	1315458	1456773	2584464	1698587	376631040	441027936	401910656	343408832	426098112	434100448	391081952	401777888	340163936	1393728	2308944	1068331	451782208	444503648	415240960	464885568	372731200	447877792	201052992	277273856	255509408	270542464	235314544
m156	13.567	297.152	Unknown	17251098	14787097	13751822	11777451	13458423	15869337	11071447	7860664	14471425	13228291	9646507	11313000	12795895	10860709	14616810	14335759	11831820	13296341	7154878	7153813	5176556	3720939	5628720	5891874	6491226	9082249	9070948	7360072	10630369	6750924	6700704	6684769	4209004	7821328	4837134	3656730	5997772	6388566	9061989	10231699	8403292
m157	17.592	297.242	w/o MS2:FA 18:1+1O; PlaSMA ID-584	618415	87840	610847	656017	249677	889128	1603235	643795	799127	549283	845691	665976	702065	345049	119496	190895	434845	215328	146866	191107	775653	75561	72720	128425	60218	526120	35573	975650	1366119	489092	594581	396610	689355	4941	114001	116400	390664	301040	319917	1215664	254068
m158	6.621	298.1	w/o MS2:Unknown (carbon number 16); PlaSMA ID-586	2188462	1649566	2172643	2701360	2735636	2810168	3115461	2736741	3369956	2420548	2487842	2368113	2882495	2408533	3325938	3028127	2644404	2232674	1233400	1044993	956302	783562	1289503	1301031	436592	872820	1122506		12585		1010702	1287734	622355	713848	1096140	1034206	1604663	2267834	2527940	2478382	2687430
m159	13.648	298.155	Unknown	2617711	2273210	1842653	1923223	1712679	2318406	1753965	1279475	2211090	1906119	1549535	1489531	1848804	1763194	2128008	1828598	1525818	1915098	909138	1217755	630492	577886	863015	564888	909626	1381241	1386666	995698	1409414	771313	678884	984134	318449	1444455	605969	244223	847902	1017521	1342844	1212639	1178795
m160	3.216	299.077	Benzoic acid + 1O, O-Hex; PlaSMA ID-595	2470058	2721770	10282435	4212384	11622567	4025978	3764616	11750073	11587546	10221527	10463535	3857023	10592576	9840629	12556687	10650520	9511707	9276283	1170718	274930	1132446	649262	515062	497102	1206815	729093	302683				756134	2219875	698375	811695	1237026	308812	3522839	1661484	5174751	2140262	1991412
m161	9.712	299.15	Unknown	5237202	4416433	5898444	5874326	6476784	4454584	6234274	5793566	5593060	5456325	5816746	4342583	6178322	5143805	6579514	4184543	4447849	1907369	1390718	1337256	1685183	1185188	606298	1744842	1056983	888172	1181775	2504			1610042	1689520	1343859	1553664	897520	1200967	1021151	2194762	2824875	2922800	2502324
m162	9.821	299.15	Unknown	5237202	4317759	5898444	5874326	6476784	5984727	6234274	5793566	5593060	5456325	5816746	5943282	6178322	5143806	6579514	5665715	4447849	4662396	1390718	1337256	1685183	1185188	1405172	1744842	417331	888172	1181775				1610042	1689520	1343859	1553664	897520	1200967	2511777	2976547	3722317	3961892	3430602
m163	10.483	301.071	w/o MS2:Hesperetin; PlaSMA ID-602		4592								7035234	7062496	6383099						88807														9377					264141	397337	342147	415911	295923
m164	5.65	301.093	w/o MS2:Hesperetin	966732	795658	718332	194863	359333	539002	885017	1052059	885224	839001	448737	969984	1388970	238976	749220	810506	503342	447716	117080	76123							222009				140102		99189		78716	30458	422169	398702	196708	549093	255020
m165	6.633	301.094	w/o MS2:Hesperetin; PlaSMA ID-602	85393	213262	50984	55395	91009	85554	3071	15425	256522	81923	151642	167478	39304	52943	234469	14319	22790	51249		107212	93916													14022		3064	743595	720814	1402365	1174628	902699
m166	7.841	301.129	w/o MS2:Enterodiol	1719498	444432	1903851	1780221	2092077	1872666	2600762	2091484	3059596	2294690	2219480	2210713	1834714	1773333	2448839	1938699	1797482	2158612	962663	832864	178738		269495	247926	58875	376399	41353	125680		11729	135671	473918	146039	594192	256731	129821	1433441	1530818	1376893	1471550	1454206
m167	7.718	301.129	w/o MS2:Enterodiol	2388544	1585550	2970388	2204387	2092077	2400970	2600762	2091484	3059596	851240	2219480	2210713	2263016	1773333	2448839	817087	1797482	2158612	962663	832864	173153		651416	647201	209305	879645	82274	35349		26384	338456	461799	178786	594192	617225	414999	1433441	1530818	610950	1889585	1454206
m168	6.466	303.051	w/o MS2:Flavanone base + 5O; PlaSMA ID-607	1634683	1558120	2216248	2085092	2383028	1921758	1292329	1532316	1351700	1873837	1838456	2258676	1990643	1706137	2282405	1998561	1869469	1935831	87522	123770	87641	128099	92809	137680	237363		22427				258081	270101	295691	229972	362973	236675	749850	1109857	1182298	665096	1022091
m169	12.431	303.232	Unknown	684316	948186	1284266
m170	8.775	305.031	Unknown	1070821	527163	1069025	2187850	1997644	2174994	1637266	1442794	1822629	2355212	2138687	2375467	1879167	1474000	2861369	2109788	1749207	1816009	85632	103273	150403	142937	162932	209651		85657	101032	854614			291717	219630	137242	272173	180136	355824	499766	883074	794775	1147807	811355
m171	5.114	305.065	Epigallocatechin	2837519	3485848	3855709		10895	98548		128213	5689		132040		3144		28019	12916		25442										127823	3541				12257				237389		214959	232795	441174
m172	6.499	305.068	w/o MS2:Sulfo jasmonate; PlaSMA ID-611	1519163	965747	1752230	4122183	4539248	1213424	3238447	3177806	4378472	1076992	3833747	1317363	4868238	3279892	1659057	3690029	1568762	3080551	44415	77850	48493	18848	146920	497716	11472	60974	170780	145647	504497	601110		44580	105364	697513	127233	2892	1351123	2117725	1805220	1466420	605154
m173	14.383	305.248	Unknown	920583	2070789	1390086																					8736
m174	4.811	306.119	Unknown	280920	664024	31019	349481	121744	445327	659265	242389	249231	368967	457676	907460	337922	570984	521099	259015	540540	574346																			107267	12414
m175	7.432	307.047	Unknown	1424069	2119569	1901736	3789404	3708989	3948378	3398867	3982611	4816730	2473213	2748698	2660689	3757570	4553593	3790167	3894661	4350486	4024442	724172	673446	616334	515243	758533	904583	391200	686236	771521				783845	755247	849983	1048900	515535	1008439	1902244	1977360	1720186	2347541	2114051
m176	2.918	307.081	w/o MS2:Unknown (carbon number 12); PlaSMA ID-615	2362156	1813201	2723558	45324	252326	226017	836328	358419	587046	120149	103047	327869	28469	54659	196734	139502	579089	55078	1846736	3688450	1393736	238166	1342981	517075	1073476	1998821	2559064				470636	383046	376893	799552	435854	696453	279618	292125	603815	630889	680919
m177	8.54	307.118	w/o MS2:Caffeoyl lysine; PlaSMA ID-617	2309619	4072607	3722924	5358464	3965055	5445390	5319933	4815002	4451935	4039620	4463231	4332014	6435122	1523797	4825117	4404856	2978068	3556609	1289111	693844	463244	291071	527414	815325	349102	833151	949115		2777		261717	557883	170732	850359	448835	688470	2397637	2097176	2413777	2181362	3272557
m178	8.441	307.118	w/o MS2:Caffeoyl lysine; PlaSMA ID-617	2309619	4072607	1216710	5358464	3965055	5445390	5319934	4815002	4454716	4039620	4468356	4336654	6433192	2815197	4826284	4404856	2978068	3556609	1289111	766266	463244	291071	534486	1297586	366163	602276	949115		11103		261717	557883	170732	1031349	448835	688470	2397637	2097176	1038367	2181362	3272558
m179	2.797	308.09	Unknown	2688876	2355402	2761456	2656414	3506193	1067072	2447914	328576	473592	331700	730477	1291542	2128410	1197587	770485	1285968	912083	1146809	366924	558911	528576				533204	525629	716721										1173566	274448	450359	281253	317331
m180	4.807	308.099	Unknown	2576756	3407883	2771054	3975214	4418766	5668000	5081712	4534632	4662784	5100062	5654416	5173303	4375643	5905634	5173381	4847122	5328078	4541061																			1185818	1583098	1175773	907114	986626
m181	3.54	309.075	Unknown	1732296	31758	84805	6745	9062	408	24117	9647	15053	36957	5684	32628	53017	12089	45982	8067	7918	5486	4382243	4560177	4598415	3060806	7155570	5398530	3428231	5519494	6157172				1621555	5937162	1591738	6209814	3692336	5039760	2772436	3135746	3401954	3883307	2898492
m182	6.882	309.098	Unknown	2955258	3261338	4906868	4663460	5924044	9414592	5021830	3683381	5403056	4387232	5429572	4023890	5357456	5933530	5145601	9212646	4643082	4603482	2000132	412385	803513	340971	407982	2479437	1025289	983323	1257260				884942	496764	1264700	647180	504825	1169689	4779590	2958312	2493571	3635590	1515010
m183	14.534	309.175	Unknown	42464424	53505984	35918628	11269361	9363033	14610148	25166224	18441774	36502300	12587513	11472447	7918342	17566922	7981822	11897008	8703149	6340814	6944368	8574835	10696217	6843768	4076745	3704054	4372428	6869878	11497898	8283175	5095008	3732490	4317646	5134541	4316335	3556307	2801677	3524968	3926826	8850211	6588560	10142584	10096662	7552746
m184	12.906	309.208	Unknown	2679861	3995291	3217790	1894534	1514753	2228068	1600591	1541040	1898977	785720	1184979	1293030	1364868	1341171	1767919	1452704	1299060	1453923	433159	655790	406006	230099	133844	94171	1745210	761926	746789									766450	970284	539155	914933	658399	707333
m185	2.311	310.098	Unknown	515981	449434	978842	1213928	1244840	1235620	866252	708307	751915	1094397	925979	1132076	895080	991244	1261216	1137536	714139	817251																			128324	127492		421425	117230
m186	7.768	311.055	w/o MS2:Unknown (carbon number 17); PlaSMA ID-639	3538748	4529679	4413255	42606			918516	1618809	655665	992231	268595	561114					2965		2650624	4004430	3197970	231003	281287		1932543	2482478	2437052				253380	182199	81680	115694	783605	840691	1179246	1338956	1101195	1482655	1421386
m187	3.169	311.078	w/o MS2:Unknown (carbon number 17); PlaSMA ID-639	7826124	6291562	2429416	1932037	4802118	2140024	1613794	1053883	3406024	835301	2171276	5321274	2232484	2997548	1026220	2232167	2013965	4407679	8878247	9132245	8371060	8500523	10261349	10414220	7762841	9789991	9866533				11171322	10154270	9912821	11705981	8714283	9746637	10113031	10307237	11781034	11037994	11258940
m188	7.37	311.113	w/o MS2:Magnolol	1121752	1265337	1402253	1164973	1787646	970521	1757548	645740	1286168	1425152	1579577	801603	1495155	578915	1871745	1791588	667344	1762184	48043	597071	530566	749199	103889	335195	686581	385238	239839		4832		286190	574082	714461	646352	243520	141230	964528	1010983	1785864	1204245	1007544
m189	4.23	311.114	w/o MS2:Magnolol	1950665	2836664	2126765	6995	1665		437374	176697	163183	163926	280148	169948		38248		2619	48118	2159	1052478	1161977	1415842	61147	135886	137444	2014710	1210212	945692				246333	110082	137071	175924	279434	116086	639918	679702	587773	573903	704386
m190	2.648	311.135	w/o MS2:Unknown (carbon number 6); PlaSMA ID-640	98744																	2399	426523	403822	596260	543814	506862	350888	475967	284458	144884				249466	546715	531030	498196	607237	526466		330320	181493	153686	179888
m191	14.383	311.168	Unknown	54525384	46390584	45361140	43084580	42885244	47700492	41919792	26814292	51508524	41529324	31869024	32041826	44346396	30750646	48946320	41851820	28033580	35153208	28579004	30801038	22162678	17445582	27092762	25677340	23512862	37200276	36386448	25548662	34372428	25885466	28963622	26170732	19052346	31216402	15308320	16734385	20709552	21064212	32243122	33120582	31159042
m192	13.107	311.222	w/o MS2:FA 18:2+2O; PlaSMA ID-647	1850762	3803690	3616771			112620	914876	502801	648120	613804	132285	373939			44604	77483		68593	455710	341875	659337				262645	496820	330796	2949		4248	199132	3004			75353		663375	241071	399321	120535	87026
m193	14.608	311.222	w/o MS2:FA 18:2+2O; PlaSMA ID-647	3379468	6512593	6818802	110081	146544	64843	561516	315231	448903	2039130	2248634	1916888	3241	89028	45045	99172	248384	308817	1231502	440673	660907					22673	2714	33880		41699	74925		87097		29008		801149	884027	1363520	546103	715423
m194	2.31	312.095	w/o MS2:Unknown (carbon number 18); PlaSMA ID-654	104781	3381	475195	715647	784819	692595	364353	287319	482967	503141	508166	668490	899981	369667	802359	924430	419092	458361	35645	61274	344480		391	166198	93832	335910					276970	36196	86055	42082	43891		3896	235252	8380	10361	443
m195	4.14	313.057	w/o MS2:Flavone + 2O + 2MeO; PlaSMA ID-657	9954223	10644938	11967279	12492226	11825451	12555293	11986060	7030618	9591002	8642030	7223828	9961098	13082124	9446557	10874437	10148905	9325697	10583042	2316151	2931968	2361620	1772322	3219065	3956469	1649021	3258251	4021880				3601898	3160479	2534032	4433992	1783471	2521988	5656722	7824850	8084634	9197628	6478554
m196	5.86	313.057	w/o MS2:C17H14O6; PlaSMA ID-655	11622338	9747428	13460185	15984776	15981883	14714484	12456326	11924332	12699911	17351434	14173762	15358546	15968162	11491526	18174146	15416542	11981147	13889095	1047135	478254	110530	551002	1954674	2329148	202988	1614799	1560304				2103173	2070091	468307	1415162	941646	1571456	3534964	6299341	6467452	6818555	8306369
m197	6.14	313.093	w/o MS2:Unknown (carbon number 14); PlaSMA ID-658	6990153	6805784	7556786	9744515	10711594	9940394	11254598	8393041	11543914	10035877	9844373	9017445	10834388	8889958	10771309	9524805	8885237	9434868	1626140	1941833	1061788	1265356	1881800	1905762	1378747	1417660	1116412				1861536	1923210	1407950	1407778	1578863	1270290	4217088	6013350	7474236	6577192	5658912
m198	13.89	313.238	w/o MS2:FA 18:1+2O; PlaSMA ID-662	6282364	9007073	8280646	159457	259032	311783	3703136	2858186	3079795	1385418	1223054	974086	144135	155629	316565	432503	99294	483059	1876101	2406268	2271355	105690	297601	153890	2581368	1359656	997213	25730	13881				290099	256083	443761	196687	1632021	1463180	1413991	1274206	1043207
m199	13.731	313.239	w/o MS2:Unknown (carbon number 18); PlaSMA ID-661	5238839	7463461	7179200	327532	80354	238375	3281482	2503236	2738280	1300786	1101658	847711	144135	150764	312067	387532	96190	447681	1876101	2406268	2271355	292597	297601	153890	3218944	1698530	1207150	51586	31223				290099	256083	162388	95812	1327227	1384582	1301289	1147334	947655
m200	7.584	315.062	w/o MS2:isorhamnetin	4394586	4795429	4964059		3070	4814	83174	38161	2994	16945	26958	847410	3173		25548	4406			1075072	239928	538885	218711	919248	329748	1230990	593784	699340				884145	339423	312361	578104	431935	320419	82291	381664	73514	34838	175326
m201	18.417	315.855	Unknown		1517215	33210	43333		373632	313717	1117265	37590	136857	128851	512756		1017363	74477	16370	1294090	1163471	1155420	1199074	2311498	1773776	683117	504813	1345049	886542	455990	130894	382437	978507	856157	610949	1665778	669303	2223057	2501290	3119588	1303388	826087	168908	184342
m202	6.472	317.03	Myricetin	8243889	7631056	9306814				432647	455471	373377	136619	232928	153805							459545	436129	336144	69316	2413091	214560	196852	186443	96399				243416	34895	52575	72137	24745	189944	591588	744243	744110	1017458	949757
m203	6.842	317.066	w/o MS2:Arbutin; PlaSMA ID-673	4475642	2787130	3522969	3058718	3152576	3353871	2920752	3230848	3105336	3003938	2660016	3014228	3046510	2912397	3055640	3185974	2673430	2389588	394736	266184	264290	332049	229554	444278	266841	405237	262995				222619	141881	378833	568694	137833	192311	2161703	2601403	1631940	1831243	2231574
m204	3.778	317.124	Unknown	210418																		931528	1157620	767010	1114361	719554	1068426	1109653	1040557	1016282				883979	693398	1045102	812346	1115450	1171943	405487	334817	352814	29335	117664
m205	14.139	317.175	Unknown	538299	799267	835008														22072
m206	19.014	317.853	Unknown	34413	1634668	67883	526662	157658	387310	216774	252933	215507	108301	702280	612114	22757	856483	23721	40718	1379972	1480395	278842	193945	514752	5880148	1776173	1960166	2044051	1207776	820670	221809	717796	1049518	1211697	1294407	1669308	1739700	5822770	1326656	3364070	1274285	896262	190335	669600
m207	6.821	319.046	w/o MS2:Flavanone base + 6O; PlaSMA ID-675	2017153	3217047	2670850	2573048	5434176	3615502	3083768	2422017	4910758	2727945	3808941	4174148	3823633	3377795	5360190	4305844	3865900	4319040	878443	538624	514141	440284	753809	1374546	681901	614709	721331				687586	1476369	1145162	1305830	309592	1128551	1603880	1710848	1850006	2493448	1867909
m208	3.548	319.104	Unknown	1605080																		8874060	8259204	8554771	11114113	8334232	7235406	8766638	8884621	8799997				8041754	7897284	9207089	7117869	11936379	9683603	5764574	4615116	4452997	3799196	3995030
m209	4.851	320.099	Unknown	751770	1347031	2101126	2985720	2464965	3271040	1918712	873916	1606505	2849999	2137170	2453007	3056384	2699432	3343920	2774126	3063718	2534803																			178977	324477	350894	319891	371692
m210	8.765	321.005	Unknown	4243980	1965512	2811341	12144363	13362741	11822498	36405960	45070688	40012504	7124764	9865982	14765848	2618936	1737075	3182976	2269517	2425774	2398182	15482754	18396962	17805194	2609786	4030769	3784513	9559774	12985223	13047052	68988032	68641376	83904472	3730692	3051925	2503766	1117630	867183	2402812	7987213	11286397	11063529	10615342	10962227
m211	6.461	321.062	Unknown (carbon number 14); PlaSMA ID-676	9205809	9889271	10814165	8233866	8626081	8357935	8282609	7622620	8118100	7869802	7829116	7759184	8687358	7049310	8881933	8094231	7404179	7683549	846578	1419512	1171672	765521	1074887	992093	970040	1219823	1054579				766764	755220	866895	1136598	886159	687573	4023121	4804482	4861032	5546226	4469625
m212	6.54	321.155	8:1+2O fatty acyl hexoside; PlaSMA ID-680	8268932	4396298	332935																7395798	8152946	8500835	2610443	2089867	1947225	5339750	6612096	6381027			133949	1909512	828236	1581323	1737354	1581357	4399858	4120876	3874072	4189122	4090982	4006212
m213	2.835	322.09	Unknown			3197	12490															1849106	1520005	506122	4057348	1168607	1827326	2270977	2857876	1375030		76252		524850	1386948	2112812	1675814	2404181	2828845	486620	161990	55341	170236	225835
m214	8.76	323.002	Unknown	3311828	1229384	1860774	7821151	8169174	7359514	22249108	28899282	24613144	4601154	6117564	9428256	1861003	1237191	2017003	1202247	1523924	1612267	9659826	11768309	11063607	1759248	2680357	2483844	6169994	8442873	8219691	44267760	44098440	54313356	2740508	1964118	1562859	518367	474372	1563401	5324636	7033239	7485796	6950510	7048192
m215	2.349	323.077	Unknown	13977906	19417436	20137682	5532124	17718772	21262608	25318172	21519468	19948450	20785488	17854104	19922796	19181666	16848100	21762870	21136578	18962194	20939098	1116078	501173	1421781	1283554	1731051	2263248	1087050	1147160	1693017	143930	407963	107702	1676458	1204900	2008931	1878995	1143584	1290464	8992003	10128964	9304824	8419926	9888240
m216	6.537	323.077	Unknown	9827312	8141708	8813615	5313608	9904699	4869177	10221680	9589230	10354719	4852107	9376953	11969817	13066232	9239108	9699984	4941258	9105252	8423948	364860	1198358	1289580	2106310	940312	996259	1525464	943845	835000	151362	451503		905254	1656549	1384282	2575787	733345	737004	4650691	7662848	1925077	6684900	4757167
m217	7.505	323.114	w/o MS2:Unknown (carbon number 13); PlaSMA ID-688	3380200	3757080	4100572	4786308	5951630	5451547	4842767	5116082	6169293	1648664	5448544	5716992	1986995	1575324	5699520	1515414	4788698	5231960	111334	548486	165629	686457	795869	1089168	313396	879864	720399			87174	662897	252677	543851	592459	195442	1227333	2510531	2945732	1092438	2752645	2553388
m218	8.774	324.998	Unknown	304651	105266	395602	1027602	1105640	1214515	3256678	3963817	3766923	502873	793401	1204860	265777	113631	236315			330638	1675820	1577479	2056416		266214	345730	811528	1140861	1103235	7124600	6810636	8694173	286889	217927	229189	126933		214530	692720	879951	1150632	977366	809883
m219	6.143	325.093	w/o MS2:Coumaroyl Hexoside (isomer of 690, 691); PlaSMA ID-692	6933714	7247643	8578461	8962683	8976351	8568838	9664658	9450057	10930651	8609301	8438431	9124025	9502638	7496772	9863827	9953862	8360720	8532737	1137805	2119021	2179772	682286	2463282	1941534	1680299	1406622	2186818				1157874	1147212	1258742	2135683	725940	1194539	4409343	5280333	4478192	5265938	4465858
m220	8.219	325.128	Unknown	4604208	4814400	3481891	3190247	6328566	1122381	5432730	4878064	5961798	3439004	3187674	3100778	6065690	5668870	4012178	6118862	3112988	6051198	222469	1002940	771687	359191	1105870	1068214	569266	1312819	1073504				1754332	282476	421096	949023	1419040	589876	2855678	3837600	670570	3389929	2946954
m221	8.318	325.128	Unknown	4604208	4814400	3493263	3184248	3516092	3134898	5445921	4878064	5972182	3454080	2152739	3115734	6093698	3158560	4014238	6162856	1634954	6045240	143696	1002940	602879	359191	832427	1068461	457696	445323	1073504				531762	744752	335719	274290	501127	247598	2867580	3816718	1737467	3397278	2955875
m222	15.209	325.184	w/o MS2:Unknown (carbon number 19); PlaSMA ID-693	47237356	34555892	37544156	34630580	36372256	36948856	36858224	24314356	42164012	34924488	26224160	26433622	34618064	24786202	36367108	33343198	21891080	29747830	25852044	31249118	19843812	17209332	23452998	22152976	24521290	34913948	34586800	23301582	27727736	21523898	24749446	24792578	16153628	27676336	18452876	16482924	23294238	21264880	30116468	28017740	25600954
m223	6.942	327.073	w/o MS2:Bergenin; PlaSMA ID-704	2576204	2274426	2923989	3901116	4181860	3150577	3793386	3710886	4412354	3251012	3151076	3387724	3930893	1345059	4241126	3262412	3334237	2914559	532829	583433	531046	380697	368745	608940	444090	540363	609927				573320	914412	291543	474642	102638	360451	486428	1815933	2040057	2401818	2031597
m224	14.253	327.181	w/o MS2:Unknown (carbon number 20); PlaSMA ID-710	767333	683794	809966	1552760	1632380	1791740	3060459	2031048	2599110	1408933	1439164	1971051	2088157	1968145	2327831	1408591	1582445	2058306	113735	325086	449426	670464	418209	618397	597986	705399	279114				854141	434651	760019	708249	695059	837469	1179206	820126	539011	465661	523526
m225	12.554	327.182	w/o MS2:Unknown (carbon number 20); PlaSMA ID-710	516006	550340	651192	740050	909825	869525	1755123	1256177	1686358	815080	556791	607232	1105389	682128	1249622	897309	929652	969344	140823	231526	273135	328199	266807	230198	152607	266735					144799	240479	172328	96994	140271	363116	395912	551091	541278	464787	399173
m226	10.462	327.216	Unknown (carbon number 18); PlaSMA ID-722	1701571	1551836	1204310	257893	386978	203997	4808305	4104266	4444712	107925	160504	130788	316427	209240	260793	261340	122685	222037	1397708	1644631	1837938	606978	667056	607307	8956565	5177748	5095930		13576		400173	518300	434903	1717976	1553804	2324385	2257678	2122470	1537960	1372872	1556898
m227	11.683	327.217	Unknown (carbon number 18); PlaSMA ID-722	16206524	2994238	2735989	163025	111499	2900	4590594	3661912	4023172	333752	402338	227629	126525			79553	81111		4365786	3460879	4226483	328646	428131	402062	5946626	44568888	52206216		392098	799572	297447	225956	260761	991240	971487	1014114	2667517	2562335	3352287	4016788	2314930
m228	12.843	327.217	Unknown (carbon number 18); PlaSMA ID-722	5764941	8186776	9352692	175096	14730	73999	1368418	1462366	1509174	1329304	1477391	1139474	118442		326848		266227	25013	564257	1149806	526015				518143	528467	353969		79211	114423						89411	1105902	1308774	1267384	968071	1084642
m229	5.569	329.087	w/o MS2:Unknown (carbon number 14); PlaSMA ID-730	1965636	5402801	2094116	6692678	2892728	5774618	8343352	6835449	8141316	5754132	6294406	6108669	7036172	2408876	3056758	7214768	5748297	2210768	2499301	1121048	827080	1985465	3491219	3114133	1949359	2716351	2963254				1356418	1311879	2837576	1452249	2188507	1174111	3916826	1655697	4296612	2181298	1560463
m230	11.959	329.234	Unknown (carbon number 18); PlaSMA ID-736	4194615	1970930	1953246	628596	461227	396129	8657808	6604476	9050073	845239	847995	1014789	638706	567246	678281	293075	789036	505303	5303602	4882117	4940036	857181	912604	1022114	9976300	8076569	9111514				739080	537922	578375	2032876	1945589	2103500	2174711	2524606	2514012	2784920	2336978
m231	10.956	329.234	Unknown (carbon number 18); PlaSMA ID-736	11588862	4625916	3984844	2276362	2819794	3350206	39096964	36091472	38400096	1014871	1009266	1090654	4046850	4324492	4502900	3158404	3166979	3370247	9707369	8419390	8294522	6770370	6779293	7230372	59914900	35337488	25649138	474550	581742	1387037	5476645	4987833	5143978	14024958	14343961	14531094	11565718	13141329	12275673	12142432	11211986
m232	7.189	331.045	w/o MS2:Flavonol base + 4O, 1MeO; PlaSMA ID-745	3706280	3227402	3438607	41923	14488	2238713	914640	1026070	1046399	884964	1061578	1050174	29932	4447	363	4453766	42266	62132	974961	1234995	942047			321	313293	977386	805602							156954	104061	349579	178146	570839	699741	332186	269374
m233	7.82	331.082	w/o MS2:Gallic acid hexoside; PlaSMA ID-747	1219171	1008204	1085447	1000981	4562012	2235096	2574329	2384796	3870628	3938224	4489896	3901153	2241906	3744942	3109113	1859591	3920623	1081226	466735	255548	393457	125863	35035	398328	501805	598629	370231				407211	339036	177965	280059	558286	538628	290694	1575484	1827174	892620	1172320
m234	7.921	331.139	Unknown	537580	344634	1345570	338357	363356	325344	440526	453125	419246	583412	530924	345176	297666	494759	763269	505259	504669	439886		4221				10356				30880			90639		14067		79970		183446	149724	91789	368132	290264
m235	6.97	333.061	w/o MS2:Unknown (carbon number 20); PlaSMA ID-750	2473968	2395112	3607534	4040874	4471668	3061260	2908681	2894907	3725895	3095286	3488198	3249821	4029615	2120714	3195641	2791527	3005949	2572662	161383	370427	545189	127552	246384	124397	418429	270754	110166				842388	251599		428671	415803	425444	959730	1338659	2138426	1818288	1295977
m236	8.184	333.098	Unknown	1819858	2442535	2653826	538238	880301	671137	2181236	2154646	1617652	1743231	702939	2293181	1082952	536443	1073841	738695	1178299	531173	361123	498650	649054	41651	302911	277320	315550	333903	350314			29463	640003	748708	9560	218121	355434	477552	395758	589712	654868	635556	376700
m237	4.847	334.115	Unknown	1085064	1891839	1485851	1718595	1792420	2211044	650049	643352	912659	1806144	2048211	1986051	1820724	2737702	1933624	1938054	2407052	2385863																			474919	235173	456189	296873	144542
m238	6.908	335.078	w/o MS2:C20H16O5; PlaSMA ID-752	10596097	12675660	13837200	4060099	5034976	5431823	5521606	6511498	6604723	4490218	5505634	4602182	4308924	4300614	5952146	4508816	4684188	3937036	1774722	2649059	2133379	666300	589368	581687	1432696	1414291	608342		2203		412276	518664	177041	582213	145964	749490	2667286	3582185	3892219	4073398	4234272
m239	5.704	335.099	w/o MS2:C20H16O5; PlaSMA ID-754	374395		70238		3583			10468							360				2944577	2862502	2744016	2458228	4113510	4385920	2493279	3072836	3129407				4118862	4167905	3396250	4284361	3078648	3348757	1231106	1103395	1109854	1633763	1460120
m240	7.634	335.113	w/o MS2:C20H16O5; PlaSMA ID-754	241709	177318	614312	725738	729738	780007	1348891	1700554	1586817	1234574	218173	1424878	2602683	1077788	748929	1308120	1133933	1592757	175127		4542			2781										3256		341	38281	80375	173767	443146	89641
m241	5.369	335.137	w/o MS2:Unknown (carbon number 17); PlaSMA ID-756	365196	152646	25051					26696									30493	21795	950498	1878098	1910173	1886223	621011	1802643	1477157	571797	492525				506671	1768637	1478491	527356	1698855	921205	816128	1245346	1179878	1240023	899945
m242	7.439	335.17	w/o MS2:Unknown (carbon number 17); PlaSMA ID-756	44239708	26604292	1389897				30878												28400308	30111704	28539280	4984744	4440082	5370284	19883784	23450552	22827062		409598	459167	3525319	3297812	3673675	7345852	6802361	10995594	16743333	18279240	18418978	18703920	17110098
m243	6.45	337.092	Coumaroyl quinic acid (isomer of 758, 759); PlaSMA ID-760	72396552	67654080	72719496	2216534	2634673	4290649	26239644	25503114	25477530	5668959	5426914	5769580	5638352	4046462	5761249	3228856	2960732	3560729	29914506	30686774	27282430	4396474	6251014	6217120	33248480	43673032	41544816				1986479	1247551	1306079	3612216	2563775	3614124	14857462	17755622	17121526	20240588	18771948
m244	5.147	337.092	Coumaroyl quinic acid (isomer of 758, 760); PlaSMA ID-759	49954984	59420780	64407728	391602	1055911	264132	15936449	15018655	16797828	3578916	2917762	3439602	2602345	2266668	1852859	1056506	902895	932947	16155292	15636996	14897768	2364594	2660939	2290864	17078052	20453164	18307438				458943	207551	377154	1591768	1401934	1407793	10564533	12166696	12503133	11399453	10532646
m245	7.647	339.091	w/o MS2:Unknown (carbon number 15); PlaSMA ID-772	886042	206611	410635	7898	10409	892	60713	87555	5217	1963	4100	6546	11016	11362	5447	4406	961	1967	2142257	3437008	3566977	505350	106679	334834	1756052	578930	886556		61734		61008	57779	2999	325629	1279147	892161	1147220	721942	858399	1023412	1562390
m246	6.884	339.11	w/o MS2:Licodione base + 3O, 2Prenyl; PlaSMA ID-775	550023	548690	685249	2442518	4576958	4140012	1145669	2196662	5129354	1239682	768180	4109575	4771804	508573	1899273	4198986	3290501	4228580	90662	65315	307295	14471	403	16677	59180	71221	37384				127445		195406	35087	2604	170355	1233998	1338228	1151461	667016	938054
m247	15.996	339.201	w/o MS2:Yohimbic Acid	16264864	16336185	13224300	11840430	13164501	13950751	14152580	10057876	18388584	12945123	10061787	11519252	13751077	10931511	14324989	12109770	11599376	13746337	11002004	14209890	10947864	6618973	9415615	9752109	15513280	17435404	16575304	11508520	11662232	10154419	10073476	9796607	7122471	10991162	6808635	6577653	7487372	9331827	9811399	11499643	10771655
m248	4.016	341.087	w/o MS2:Caffeic acid hexoside; PlaSMA ID-784	17422900	19234746	47744636	21482108	19113776	20280750	18236740	17839954	20022518	19538894	23323710	18205744	23027816	14900477	25497364	18449206	17126204	18864420	1592337	1812431	1046824	499696	774981	1104482	917148	1097526	1015037				697838	626918	659746	1544653	668820	1888218	7975602	11540313	10499148	14236276	12030064
m249	2.963	341.087	Unknown (carbon number 15); PlaSMA ID-785	6932582	8412080	8898870	26854364	26278558	27732916	33889000	29246938	29954556	28929514	26409110	29169980	27439750	28253998	29684988	30321848	24064896	26832616	3199998	2105878	2309896	2593350	3902284	3548881	892119	2307514	2221851				3967048	1838090	1679505	2919646	1383788	1609486	13727754	13752258	14097596	14531478	13096770
m250	7.074	341.087	w/o MS2:Unknown (carbon number 15); PlaSMA ID-785	6023784	6065129	6917874	7915322	8842163	9277360	10663875	9541673	10588905	8087412	9286254	8951186	9377467	8941596	9997592	9316319	9398681	9753303	312695	1141415	804107	274012	291139	402556	221689	407733	251741				383266	474114	270214	303066	776253	364396	3249640	5117970	4973862	5376678	5393955
m251	3.069	341.088	w/o MS2:Caffeic acid hexoside; PlaSMA ID-784	7299572	23700872	9314688	25612092	27469718	26253776	32369406	27538992	31969844	27491946	25169930	28002670	28653452	26938034	28257826	29002704	25377204	25337228	3392930	5623350	2309896	2641589	2601960	2217591	892119	3281786	3299454				3967048	1423891	3201324	2919646	1387623	1609486	14186767	14306252	14121072	8897254	7336426
m252	7.582	341.123	w/o MS2:Unknown (carbon number 16); PlaSMA ID-791	675101	745359	2565450	1722131	2495162	2560527	2837094	866055	2558743	2473306	2329665	2350942	2502033	2062309	930737	2062255	2303609	898245	214953	180016	118609	30977	92407	124774	243291	508614	492180				173963	282425	318750	92839	518509	121863	467328	1596956	584666	711836	1646179
m253	7.76	341.125	w/o MS2:Unknown (carbon number 16); PlaSMA ID-791	283016	333459	435656	505745	871459	2547866	2842055	2139803	2544986	854682	797259	813123	2502033	2062309	2772551	557289	832079	2107415	123207	45717	22613	3442	11921	35089	95359	169855	66285				173963	385438	124096	93081	238719	69876	1404743	504380	393479	502341	525113
m254	4.099	342.092	w/o MS2:DIBOA + O-Hex; PlaSMA ID-793	2466199	2777134	2915450	2556291	2411168	2666251	2907640	1006530	2710561	2582345	2543540	3080203	3219518	2364634	3063380	3341741	2190821	2873357				21334				12509	12145							11975			796758	848049	371700	944692	757330
m255	3.658	343.103	w/o MS2:Unknown (carbon number 15); PlaSMA ID-796	79949			2097		5550						379		31580	7592	7608		50223	1931115	2356124	2364193			126103	143981	211150					84615	87533	89677	23333		94713	96159		344389	264710
m256	6.846	343.104	w/o MS2:Unknown (carbon number 15); PlaSMA ID-796	706134	548294	798098	697183	864025	920048	1123504	978987	922967	931170	932825	744954	1157675	399202	978190	893995	704874	563606	470450	392007	96014	198472	102455	217822	362903	115039	312623				330047	678988	5942	298370	269163	113136	514557	661181	573558	820828	583433
m257	9.847	343.139	Unknown	16315525	13925576	18700030	18887300	21179888	20474020	14199736	14559772	12713127	18261192	18929056	20366414	21941986	17437640	23477646	20232238	19717120	17445966	2206976	1945827	2147300	2032839	2433641	2769707	1685410	2265906	1823028				2643990	2579617	2432659	2493772	2095997	2610334	7484064	9068209	11315978	11339547	9741814
m258	8.396	343.139	Unknown	37401292	36176916	42729120	44872684	55035012	56716496	64966736	50811212	66179752	53215336	50618340	56515716	57603872	48368664	61595500	56231848	45801572	52190152	14437796	14669654	14367099	12422624	15090648	15835001	12790355	15588568	14650500			86982	16099206	14248983	15936889	17114378	14560919	16166234	26814180	35329864	34029992	34361612	31350682
m259	8.901	343.213	w/o MS2:Unknown (carbon number 18); PlaSMA ID-798	514163	254999	24539				1976399	1535912	1874889										238035	391305	302009	120997		116220	2896603	2422882	2283738		78415					278617	256919	10259	216848	682372	457015	257432	387010
m260	5.763	345.083	w/o MS2:Unknown (carbon number 14); PlaSMA ID-805	240111				92988	109681	322571	318597	366282	1723	286329		230439		150582	93093		115317	1086038	1658614	969556	541004	1576735	1606368	991259	1224643	1344363				1543461	1433239	1509403	1347084	869971	1028938	266554	1332321	1046086	1513492	899904
m261	5.843	345.083	w/o MS2:Unknown (carbon number 14); PlaSMA ID-805	94863				92988	109681	322571	318597	366282	3876	286329		230439		150582	93093		115317	1086038	1654317	969556	567647	1576735	1606368	991259	1224643	1344363				1543461	1433239	1512943	1340889	869971	1028938	112078	1332321	1046086	1513492	336569
m262	11.084	345.228	w/o MS2:Unknown (carbon number 18); PlaSMA ID-808	4381992	3660567	4908429				373006	968927	580459	139906	330554	333279							1302656	411109	901073				441063	542448	681087									149525	325373	415313	450839	258554	105296
m263	9.513	345.229	w/o MS2:Unknown (carbon number 18); PlaSMA ID-808	1577225	741844	1011936			76332	1812065	1621289	1817652		81824	10639			89646	79267	138675		690730	1177477	921784	210132	97081	90956	4242296	2433278	2515822	28132			90964	212493	156407	764290	627380	580305	394992	419355	406816	872391	534011
m264	4.763	346.084	Unknown	142721			13239															1124977	642819	370218	1647937	423665	1549676	829966	709284	1394429				850614	447663	519357	1105811	1178236	2517962	779116	335751	235824	149109	42507
m265	2.984	346.143	Unknown	1474647	2556595	3058572	4127128	4210998	3415204	2775120	2196842	2222476	4118194	4182412	4026011	4420822	4038222	5737260	4773546	3754708	3983968																			328574	492588	355262	125161	664710
m266	7.049	347.077	w/o MS2:Methoxybenzenediol + O-Hex; PlaSMA ID-809	3100800	1188149	3806650	3045762	4013496	2705212	3167162	2795417	3792102	2550206	2728418	3069602	4072375	2628937	4182676	3127486	3057358	2193961	90372	25210				198532		84298	3540				162919		11028	2507		213375	363471	1682734	320454	273976	163507
m267	5.824	347.099	w/o MS2:Methoxybenzenediol + O-Hex; PlaSMA ID-809	7403773	87327				12741													31384858	33251796	26593168	22843772	36586116	36084480	23886760	27631826	32940452			10230	35653136	35250580	33408734	39231788	24534282	31170350	12190516	14065063	16908756	17417020	17001528
m268	14.341	347.199	w/o MS2:Unknown (carbon number 16); PlaSMA ID-811	872377	1534716	1520117				1562241	771277	1108121	500568	551573	424845					275257	335469																				93425		37135
m269	11.171	347.224	Unknown	616071	1047849	976818
m270	13.733	347.224	Unknown	641325	815539	1240615
m271	2.966	348.138	Unknown	56497	333401	125636	547276	1181363	910360	276772	33883	360895	689293	502037	757414	931016	769850	963755	881318	742650	456478																				95435		117400
m272	5.187	349.055	Unknown	66570428	77464032	89654904	257072	98105		47181	102870	40550	353885	408361	123700	180548		68129		164568																				5148618	6816935	6440743	8493644	7467520
m273	4.39	349.075	Unknown	182117	37650	20393												1670				3351885	2760452	1940036	1412726	1938121	2163246	1370946	2443822	2209892				2571409	2293546	1781999	2199120	983318	2345298	231483	443496	243769	512605	283903
m274	3.313	349.076	Unknown	259689	15285											2563				3143		3069103	2884490	2675866	1697471	2880050	2828698	1574646	1928883	2538364				2558034	2667656	2266583	2791354	1813331	2926932	998329	1286993	1300897	1365196	1386765
m275	7.079	349.095	Unknown	762514	370228	3484131	2012770	272288	4526248	1510181	3106697	1373938	1401296	4184261	3839766	1265829	3396375	4105819	2256696	1216412	416405	35620	73530	34756	11582	60075	218024	51328	102847	42035				418281	18128	46388	166933	20042	42745	1472220	526158	201410	2225991	678159
m276	6.875	349.113	C14H22O10; PlaSMA ID-812	1868976	38437	94979				13810			25469	10004		851			615			8003572	7615716	6914636	4006026	7096285	6843385	6161422	7706408	6835416				7337872	8331526	7725622	9097949	4575433	8168108	2345444	3078562	3284138	3496962	3101233
m277	8.22	349.186	w/o MS2:Unknown (carbon number 16); PlaSMA ID-814	3410014	2026406	86681																1143767	1208307	1300437	231160	195179	153629	948137	636046	911578						140181	328361	213415	391920	1369862	1524906	1325022	1114126	1026469
m278	5.109	350.061	Unknown	10430141	12574436	14607183																																		761036	943048	1126380	693304	589743
m279	6.035	351.072	w/o MS2:Chlorogenoquinone (Not validated); PlaSMA ID-819	4292120	5593993	4179484	670218	409951	530055	2027712	775909	1910276	1586804	1214028	1789929	592570	333084	367627	600836	3191104	63282	1484368	876588	397327	197430	107649	3905	1082551	1175513	899290	77880			104617	75080	100263	244203	448809	195603	991576	1121501	1415178	1163335	1066291
m280	7.068	351.108	w/o MS2:Isoflavone base + 2O + 1MeO + 1Prenyl; PlaSMA ID-822	8134375	4659528	4850234	10475044	9621524	12022342	13020457	12383913	13564032	11252382	11920054	11864951	13284550	11520317	13647212	11621086	7734741	8782062	1439490	1563290	1582784	1954668	2714434	2752295	1549773	2364496	720026	1047			2301353	2530932	2250828	2999639	2012790	3144434	6121582	7262392	7154045	7112318	5562790
m281	7.287	351.167	Tetrahydroalstonine	3000712	263919																	19896294	19865254	18777276	1073785	1497748	1434938	5405876	5940424	6859700				653369	648689	562454	1638028	1283246	1543566	3001431	3701240	4054073	3763214	3107967
m282	11.903	351.18	w/o MS2:Tetrahydroalstonine	2021325	3179264	3171105				71935		78081			23632									88928												24252							81211
m283	7.053	352.078	Unknown	8238045	8691989	8820803			1039053	1940783	1442478	1907198	1744713	1271517	1571379			144580		126315		1375129	832500	412690	11691	3181	2828	1602589	2036058	1371509				97829	17760	14986	155786	761053	635468	2219665	255086	987136	1092637	1149562
m284	6.468	352.081	Unknown	2540708	2483071	2154360				282733	227842	489985	536977	1726854	1491294							5049807	3263076	2935692	37962	101838	90539	6485199	4095208	5694368				33161	82686	155616	1199900	1040838	1904516	577515	1339011	710900	320130	762982
m285	4.865	352.124	Unknown	812201	1358181	1015457	1971615	1736749	2087951	1450303	1144744	927858	1820094	1701900	2038232	1424500	2041043	2271382	1821133	2331620	1636780																			736772	254865		80844
m286	2.871	353.086	Caffeoyl quinic acid (isomer of 831, 832, 833); PlaSMA ID-832	476464768	577892032	516145120	2600890	3672147	3183964	124057864	122652088	90466744	41209008	17663912	28219390	3692224	3541089	4281314	1274858	3754896	3355188	95351056	131685112	126258800	18171474	20817384	11121769	136969952	151437056	154333040	537109	773850	31023	10360022	2311046	3421066	5493113	25165484	24361458	92738768	101798800	97801960	96447808	91484104
m287	5.345	353.087	Triacetyl resveratrol	297037248	286039040	322423904	4670366	5371193	1272737	72908672	78047256	72351376	22513898	13060643	20053020	1551615	2217058	1718691	1188706	4278024	3085714	57520912	84295512	66395000	8579082	17942502	9902938	81082504	84415432	113475672	149368		149285	7122899	2325880	2407081	6502236	14112367	15261360	46403824	55101952	62826160	73552680	67903960
m288	7.797	353.089	Triacetyl resveratrol; PlaSMA ID-836	57344864	69818280	60445640	3419			10407911	11330392	7691638	2791205	323095	1940836							4921491	11375059	11526300	1517819	1544405	361138	15560258	12948333	14170016				591612		2459		1442566	1509009	9563224	11869651	11879966	10073326	10179255
m289	3.784	353.101	Triacetyl resveratrol	7465670	9077236	8750790	704550	803858	695384	1544984	1532340	1265788	664614	479757	635758	245222	293912	875130	196730	700836	864684	6558204	4679654	3987764	5357597	9398046	9818798	3026162	6348728	7014535				8402918	9645422	8333364	10398802	5227278	7154060	2299142	2561535	2824803	2872780	2860026
m290	14.987	353.2	19S-Methoxytubotaiwine	22953176	26046470	16335411	7143648	8865988	6901242	11830459	11681692	22678460	6260087	4675200	4050490	12475237	8205178	11863904	7920796	7859804	7792662	4311154	5178331	7631988	2322426	3728882	3649192	7038201	7867068	8573241	5242574	4217232	3097576	2398644	2550116	1672522	3760612	1494015	1588434	3465483	6117138	4058980	6390538	5771136
m291	3.796	355.098	w/o MS2:Gentiopicroside	1350025	831340	757629		79060	22165	4577	48720	125519				238916			95490	98130		2894359	2662806	2606600	1447575	3508477	2983888	1981543	2377042	3225979				2727987	3013042	2180700	3375393	1686218	2294951	1409283	1872872	2115356	2340139	2510364
m292	6	355.105	Gentiopicroside	292181	234580	221818	2322852	2646035	1010376	1516340	468838	3370951	1716889	752638	2461324	1013202	942186	3007630	2423429	705514	1747920	3946	22192	10831			2577	14662	10618	26287				234901	101089	157132	81452			55689	184812	1344970	186741	341838
m293	8.344	355.139	w/o MS2:Unknown (carbon number 9); PlaSMA ID-850	255081	1360920	315773	353391	1676357	1230719	1432133	1541482	1077330	1047568	1881781	1498104	1629098	1007729	1429671	1780789	947465	1400527				136384		129489	113636	26454					97845	125153	29831	217838		175530	197710	757318	1145892	578146	323827
m294	3.072	356.172	Unknown	93873	782411	176058	429912	461431	585302	202166	174330	267785	348833	699951	732376	406289	1064329	965951	339362	698189	1154301																				323566		79002
m295	8.774	356.981	Unknown	1936186	905258	1114354	4744769	5829529	5557576	14679161	18617166	16056159	3237897	4821644	6764206	1069237	594148	1397472	913044	1124954	938434	5665926	6525702	6478536	752749	1545664	1431442	3564552	4724209	4081214	31563784	26337076	34356516	1649902	1240541	1081623	440599	297538	1283767	2400327	4692875	4457569	4611428	4243765
m296	3.55	357.083	w/o MS2:Unknown (carbon number 15); PlaSMA ID-860	2337044	3012594	2774399	2453330	2565671	2199941	3100811	2908696	2903360	2319678	2023697	1829729	2258471	2704406	2241030	1719137	1909080	1751113					142522	144737	177700	86177	110320				26804	86361	11238	21884	105423		1840197	1054369	1647260	1513342	1088716
m297	8.774	358.977	Unknown	1900463	751553	951852	4769082	5725060	4834434	14470307	17207406	16167982	3114536	3924918	6778724	940010	448907	1087108	1043616	981969	946308	5293243	6445449	6306098	679805	1480320	1256260	3131698	4418046	4138714	30161198	25741556	34032260	1161867	1165751	894512	378472	307569	813177	2536153	3898770	4040247	4733094	4271463
m298	5.604	359.097	w/o MS2:Benzoic acid + 1O, 2MeO, O-Hex; PlaSMA ID-868	1635593	2469702	1091757	2920126	1032015	3637600	4003248	2499679	1482310	4108872	3430153	3897962	3866256	1192852	1396993	1257714	1052205	2991259	90856	342926	90449		39001	309929		189787					52639	503345	25370	197741			380678	1587022	566155	618469	2188468
m299	3.227	359.097	w/o MS2:Benzoic acid + 1O, 2MeO, O-Hex; PlaSMA ID-868	5921492	2016631	2207996	9096506	8951203	8697103	11624088	9937527	5300516	8323642	8944211	6244778	9818311	2920512	10206995	9152033	7979014	8036994	636567	956394	304339	227741	141137	176607	153943	110105	302966				1003068	394924	159464	245287	185317	184469	1464886	3854509	1541857	5516170	5775198
m300	8.767	360.975	Unknown	345635	200027	357937	1371666	1750364	1469820	4384916	5728902	5426334	972390	936542	1536800	23345	228415	425447	201004	211534	353142	1683750	2073552	1851729	173078	334145	308257	869550	1295501	1408345	9207932	7907916	9927656	294493	255666	232185			141656	874753	1222210	1356381	1418434	1172712
m301	6.074	361.112	w/o MS2:Unknown (carbon number 15); PlaSMA ID-874	505739																		1847997	1365994	1623849	1780851	2037748	1912660	1626580	1802604	1674755				2245481	2374428	2170782	1831231	1501271	2533919	842407	790684	844522	593016	829203
m302	8.765	361.149	Secoisolariciresinol	15970862	13582451	18187060	17131560	17036126	18737812	22434148	16974332	19614550	18181504	17411266	21268634	17417760	14992892	20878908	18744540	14351163	15610994	5080126	4831164	4381112	2721872	3432706	4265099	4525726	4869540	4508384	191063			3390328	3482720	3318874	4914753	3694916	4459174	7702327	11578169	11665389	11239610	10097888
m303	10.708	361.151	Secoisolariciresinol	80984544	84285392	96023128	88250936	94411768	102823448	146285504	148874192	148702208	88913136	101839680	106333696	110782344	95556176	110872408	101179144	92506688	96724248	20149246	18410256	19328392	16362588	19306904	22032574	23544610	24189974	22150396	122056			18905526	17408812	17585632	21720656	18685636	19751416	54940332	61229560	58752820	59167288	53898532
m304	2.385	362.086	Unknown																			865116	926634	610006	845289	1472358	1247995	1231493	1609640	619631				1932979	1870590	1477045	1513972	2113112	2011206	76884	30886	591953	33508	110548
m305	6.169	362.122	Unknown	80767																		866479	715945	919234	823788	1157333	752248	1054260	1024354	571954				1225616	791203	941172	871415	1114389	1025437	423089	291397	144920	332534	289616
m306	2.555	363.035	Unknown	857987	508078	368870	1592946	1906315	1756657	1441986	1113073	1683883	1298686	1823420	1371837	2204102	1872618	2211523	2098998	1157780	1939915				84876		96569					14340			86351	84646			82650	457455	489641	708135	722431	738794
m307	2.664	363.094	Unknown	5822651	238180								382									21360784	21534562	20625946	21018586	28448364	25047358	13655291	18010808	17948854	84202			26537738	19602764	20223642	21711460	17778250	24222098	10713124	13176666	12738158	13881593	13405292
m308	3.788	363.13	Unknown	438938														2617		25623		2339056	2425410	2597810	2565890	2055836	2114834	2167798	2511569	1974034				2270782	2183505	2215508	2183322	3116213	2770298	1573166	1140050	1095536	1518480	868049
m309	5.186	365.037	w/o MS2:C12H14O11S; PlaSMA ID-878	1263472	1629250	5145758	8124782	9131245	3352835	1463684	930164	1355556	9603223	8426973	7426783	8897023	8914395	11862539	8668921	2871302	2704510						16875	13878	88637	71428					9759					1977775	1486738	2451168	1969922	961976
m310	5.024	365.037	w/o MS2:C12H14O11S; PlaSMA ID-878	3364173	1879486	5145758	2659637	9131245	10690074	1463684	251098	1355556	3029787	9001150	2608834	9296935	8914395	3961462	8668921	9609122	8374201						2109	13878	77528	67998					1084					803157	1486738	2451168	531478	237417
m311	2.814	365.108	w/o MS2:Unknown (carbon number 17); PlaSMA ID-879	38724268	2017151																	149438896	149570208	142897728	106841424	180404528	135984608	101546552	160267136	118282064	2249331	2086038	1946684	173890448	131166536	167217104	146902848	114982608	129343456	75089640	84072896	87111368	89192008	87531440
m312	8.303	365.12	w/o MS2:C15H26O10; PlaSMA ID-880	500588	387895	229213	1069882	1012613	1250670	1249696	1030604	463015	497208	632386	509508	859671	837988	932157	680191	95981	1059446					100807	139179	82151												511340	244606	337277	460778	70471
m313	10.961	365.21	w/o MS2:Unknown (carbon number 24); PlaSMA ID-883	1264996	366017	102669	228654	233525	499938	4668898	4195808	5018266				593782	291091	527393	301118	166749	167639	670876	932112	479811	205853	528267	605001	4781024	3274892	2913835			259582	416381	417054	408105	1610428	848689	936713	832543	1160090	1284842	1758121	1005482
m314	12.553	365.234	w/o MS2:C24H30O3; PlaSMA ID-884	2881037	3105074	4215636							188020	85804	16717																										151569	12473	244263
m315	19.355	365.246	Unknown	216294	452524		108844			5859568	5692987	7398071	155262	208432	189400	220027	481563	512806	285677		231106	10749562	18138054	14426712	4169191	6399984	11144497	1447623	1435834	548677			2152	7234501	4261274	6107931	5268366	2931468	5018695	940313	1369674	798854	1281239	1155922
m316	6.81	367.104	Flavone base + 3O + 1MeO + 1Prenyl; PlaSMA ID-889	54887112	46394880	58940532	2375066	8638274	2532798	22334178	20928562	21040638	9880354	8849560	9824667	10169861	9188527	5142657	2454922	2390119	2254780	23448288	22133634	20665764	3240387	4529997	4131638	22705288	33307152	30934412				2071910	810993	1625070	4295488	3348948	4945730	14998689	17516140	18881316	18927584	17558548
m317	6.492	367.104	w/o MS2:Feruloyl quinic acid (isomer of 886, 887); PlaSMA ID-888	13802569	14835939	15255392	8820486	8663326	8649179	5443030	5162300	5083774	2436555	2219311	9824666	10186014	9183548	11027554	8366021	8156286	7995068	8477022	8279062	7782344	1330806	1584553	1421267	8430676	12235639	10921127				765783	292041	573737	1820886	1369925	1815819	3184068	3566945	3876640	3819463	3459702
m318	2.715	367.112	Feruloyl quinic acid (isomer of 886, 887); PlaSMA ID-888	1059464	541786	1780140		34452		105753	644227	178937	79986	65383	72941	297839	523	41616	8783	72315	29844	3790547	3558098	3368199	2578410	4362741	3001666	3217313	4246782	3981976				2409430	2834408	3309110	2975484	1311979	1670742	371668	1284860	1527053	1624492	1406468
m319	10.965	367.206	Unknown	453511						1424901	1295407	1451435				204003		144939	126366			164010	244681	159016	106023	209397	235534	1407061	1021552	845150							512243	152841	193218	124440	317041	283007	274420	414486
m320	19.499	367.242	Unknown	24330100	25631796	27556426	27882786	27422160	30365946	32302392	28712562	32377492	27595564	29968784	29625392	29470258	26870648	30572250	27117160	25331586	27809672	25819054	19537514	15240231	5967891	30619080	26468972	5928438	6922684	6334486	2207839	1607626	1794394	27436450	7875792	24445896	8727300	6802355	32008388	14867708	20001714	18961380	18574014	15211618
m321	2.871	369.083	w/o MS2:Unknown (carbon number 20); PlaSMA ID-896	7069390	9802831	8360440	403040	1629976	984710	4779068	4386466	2726793	2322378	2399961	1580613	890111	366008	863435	2078778	1066164	1687617	944184	1177567	779416		103099		1266769	1162936	1826077				205656					22497	1809635	1980652	1905242	1424670	1883236
m322	6.831	369.12	w/o MS2:C21H22O6; PlaSMA ID-897	4182304	4262460	5248574	5664814	6200406	6096341	6125839	6274710	7724244	5348107	5556017	5607820	5667161	5962618	5695088	5417636	5789892	4479796	809560	218222	653648	3606	551439		274281	920930	209145				798183	701018	228219	1060790	378152	472083	3334650	3600788	2429528	3318890	2919514
m323	4.855	370.092	Unknown	9439140	10187663	13527634	18707704	19115720	20579138	10134784	9603681	8106548	19392186	18451352	16567968	19856300	16925838	22225934	18485414	17504932	15143889								2801											2963447	4131294	4133119	4117645	3656786
m324	19.721	370.245	Unknown	6985155	6840406	3861770	6968029	8135412	4067936	8694423	7037528	7998970	6640075	8394045	8099323	8424668	6771956	3969989	7844129	6994058	6808096	1201737	421380	673310	408317	850388	1313093	1254775	873885	201428			27555	980163	812195	1544455	1114725	916153	692883	3202060	5206794	4695133	5417182	2348304
m325	2.731	371.099	w/o MS2:C16H20O10; PlaSMA ID-899	8219134	8871156	9193083	6385116	4931083	6688592	5756062	4576630	6531988	6934744	6466391	5969172	6683302	6785654	5674996	6284456	6411791	6517683	1285412	955163	1252382	100599	3490	157047	1355120	1148192	1351988				18233	146900	7319	50504	394877	426974	2067792	2981047	2512944	2999990	2251033
m326	5.975	371.101	w/o MS2:C16H20O10; PlaSMA ID-899	288906	210576	382955	706789	511817	350432	715420	284673	746323	683451	644248	1034647	658771	907115	372765	384999	508056	223369	1561586	1850333	1367047	1417723	1881026	2816906	995544	2957900	2613678				2107014	2551061	1004217	2702929	1689808	2059007	442602	2007872	472222	2024889	2527991
m327	12.674	371.172	Arctigenin	3076343	2267722	3081132	3430379	3944941	4066068	7584318	5807680	6599454	3661533	3947739	4218619	4402614	3690950	4119984	3367475	3821750	3663738	780619	1031054	1131101	619593	862706	817400	941397	849164	769866				839442	811115	444080	1347119	535088	853281	1065770	1460139	1725935	2040857	1468075
m328	4.83	372.088	w/o MS2:Unknown (carbon number 15); PlaSMA ID-908	1761735	2730904	3167672	5280350	5289477	6545923	2248598	2091364	1699273	4942578	5087459	4898989	5321682	4415243	5874221	5406836	5777792	4026366																			438424	804469	627096	865237	593983
m329	6.9	375.072	Unknown	2747150	860007	3282728	2797676	2451074	2056527	1489775	2531934	1594449	2132517	2543882	786919	660451	2402971	2966668	2629052	606606	2251730	3233	3275			2600	143146		2582	37330				180387			155059		29587	553009	1418180	732679	1282367	723917
m330	9.445	375.203	Unknown (carbon number 18); PlaSMA ID-930	620099							39903	52590										11065329	10531226	10428002				31059	43849	27520										957325	937756	1149314	1390343	1288501
m331	2.439	376.153	Unknown	837174	941623	1258418	1714037	1741982	1660169	995213	1026808	1000125	1614701	1496446	1486367	1547155	1614769	1991185	1624439	1213670	1870232					16117			1684												94256	316167	371262	388417
m332	7.075	377.066	Unknown	226659	317461	282593	684355	801103	937858	754442	619114	811593	654419	421796	653541	479587	459279	858939	754308	625311	478849	178287	8729	99340	326914	65785	36351	2356	210509	999492				22048	106686	4140	2823		616053		84207	127887	301954	961352
m333	6.179	377.087	Unknown	1852251	2516434	3135396	664010	649105	822929	3630421	1809093	964984	587175	1718279	808462	600465	478586	658828	823767	485496	625586	1133216	1135372	1054239	24943	32297	56169	294179	517548	395660				81533	4029	291	228190		22577	890159	982854	1448193	1201703	943048
m334	8.421	377.144	Unknown	858652	1143545	604184	433636	580613	925514	656560	140064	996777	474900	569657	431180	508815	481236	731440	487967	570034	731821	283797	88381	340760	147550				90971								266082			307687	405213	134807	192425	215456
m335	7.701	377.182	Unknown	139349	192854					109532					632935							2112366	1807543	2204759		154608	143254	426617	1012099	659704					86214	92333	228574	251497	415094	520961	677968	437666	474599	130471
m336	6.946	379.067	Unknown	2064757	1437766	2350211	944301	1140954	1660306	2752564	1341308	1486358	625185	1315109	1238713	957877	811111	2461398	1039329	951734	1500078		12490			14683	4425	529	2827	4878				1231	3990	174412	1605	1506	9278	739435	288449	462863	1305841	488817
m337	6.289	379.125	w/o MS2:C14H22O9; PlaSMA ID-934		10339	112019														1194744		331099	334336	490916	304571	321023	339983	255588	200950	302194				533151	290968	356438	498378	427400	353048	1231636	2339852	2364607	1548907	1765148
m338	5.858	379.126	w/o MS2:C14H22O9; PlaSMA ID-934	22941	82692	18547														808		1476096	2778715	2089446	2057572	2656866	2734348	1193905	2311644	1462399				3737980	1828023	1470392	2457749	1548974	1615770	382949	644745	665984	320699	589590
m339	7.942	379.138	w/o MS2:C14H22O9; PlaSMA ID-934	176045	504162	318516	1065966	1452599	624455	735242	1696181	650816	703003	999223	367884	893078	1121064	2053488	463887	588708	198279	29146	38610	207021		400	425	971	2773	70	3881			1744	366	2070	188103	1520	663	60669	605712	121346	174361	119781
m340	8.238	379.16	w/o MS2:Unknown (carbon number 16); PlaSMA ID-935	1884915		1084801	1195		1753291	2059939	15426	1694789	888970	4060	1270746	1078				1605120		12582557	11803612	11275377	950420	1487809	1293894	1621394	2505675	2145032				2034031	1592195	1775558	2699554	2067195	2893731	1537608	2506898	2112468	2211764	1943117
m341	4.825	380.119	w/o MS2:C17H19NO9; PlaSMA ID-937	1173481	1948891	1887225	2365301	2390731	3253175	1313828	1125765	1055602	2671055	2929391	3160070	2352884	3759072	2426238	2566806	3428073	3292216									738										636679	528058	587188	495394	266906
m342	6.133	383.097	w/o MS2:Unknown (carbon number 21); PlaSMA ID-947	704677	2229162	1544831	2688219	2869170	1056736	1524268	2763363	389536	2848130	1997233	3459791	1870343	1390055	3448912	2995516	2238096	1537134	7916	5324	95590				36965	225468	2886					3612	98552	24814		5546	170109	706255	605608	279252	254433
m343	5.979	383.097	w/o MS2:Unknown (carbon number 21); PlaSMA ID-947	1719784	880403	2860932	2688219	2869170	2991182	2519690	2763363	1229597	2848130	2181689	931865	3443573	2009626	3266630	2995516	2238096	2058912			95590				103511	104771							293285	2757			528802	706255	1785077	164158	197114
m344	11.506	383.133	w/o MS2:Unknown (carbon number 18); PlaSMA ID-948	351670	316269	202827	797095	601616	632878	381743	285492	581738	676042	721451	526935	635407	498176	646210	587954	651893	690412																			91102	225505	235431	84231	90247
m345	10.726	383.133	w/o MS2:Unknown (carbon number 18); PlaSMA ID-948	388349	460147	521763	580515	870032	621227	202554	993060	88120	612833	690973	1099242	696071	1008622	574810	781667	533196	732739															81974				316298	94159		150116	158412
m346	14.421	383.177	w/o MS2:Isorhynchophylline	138580	426642	532189				607633	503892	783529	350863	156395
m347	9.775	384.171	Unknown	2042283	1974392	3286586	3960186	4114698	3899071	1162584	1155662	1104086	4768836	4310133	4174760	4925906	3707718	4652397	4096574	3406222	2999527																			305109	786913	928634	1298784	1053526
m348	6.691	385.078	w/o MS2:Unknown (carbon number 20); PlaSMA ID-952	3560702	2564738	4570160	3416853	4860578	4585177	4176719	5556606	4907234	4292532	4851320	4536226	5193724	4148160	5099296	4983849	4171094	3262687	1508362	109698	357587		1650331	1595345	1318108	1316754	1645907				1590005	423250	1551352	1605654	176809	1838512	1425098	2355640	3021676	2669924	2463615
m349	9.017	385.094	w/o MS2:Unknown (carbon number 20); PlaSMA ID-952	1608412	2428836	2163798			97161	118413		244044	217863	427436	18253			159042		152701		331275	228871	333394				100531	230297											162342	399541	409101	176994	260044
m350	6.799	386.082	Unknown	479465	444154	527994	334421	472128	509568	523742	609589	380760	255184	38211	461386	601156	250597	684820	233966	324828	519994				95339											218927				233588	25273		99211	265492
m351	9.759	386.169	w/o MS2:C21H25NO6; PlaSMA ID-959	1395671	1237751	1918235	2801366	2363772	2945210	521051	702728	411090	2712813	2750159	2297696	2661236	2384172	2795736	2714079	2225864	2187270						22169	3812												208128	571947	418140	596070	592955
m352	5.345	387.047	Unknown	4882704	5596182	5872908				2665990	2497738	2071744	492893	461325	473074																									398721	637358	732027	831785	657031
m353	6.7	387.05	Unknown	6449584	5083014	6364390		33860		2955700	2416576	2030314	808955	283045	437486																									482588	822743	820585	897466	926538
m354	2.864	387.092	w/o MS2:Unknown (carbon number 16); PlaSMA ID-960	2902130	1504458	1406708	82049	705765	33049	752471	259450	481906		426521		187316		18230	121628	162225	9529	1319223	1377476	1035238	126887	161626	368083	771054	286627	659454				1276572	268540	812359	135598	30075		864139	1136662	972934	1225579	454329
m355	2.862	389.064	Unknown	39087592	39570828	44343488			4192	9481804	10258330	8061216	2958809	1043800	1573464							6367842	9365569	7601087	518954	1836012	880254	7141968	11158668	12016976	29366			684167	115019	91346	480292	989418	1451872	5044552	7332010	7483120	7988118	7980756
m356	2.949	389.064	Unknown	40086716	40678660	45123224			4192	9624501	10470308	8249578	3028122	1016152	1567190							6195137	9287730	7526826	2017135	3817017	870903	7115008	10827656	10518535	8527			677850	111425	88491	465438	2515254	611855	5261164	7565438	7127462	8288900	8337872
m357	7.224	389.088	Unknown	1557254	2316978	1243855	1158922	2105970	1403890	1785772	1840571	236509	1804692	1336733	224631	429184	526982	1834655	1127097	200064	197807	29984	2941	11400			9960	14325	49683					34832	26853		106104	3662		45801	180188	270535	67113	119171
m358	5.764	389.11	w/o MS2:trans-piceid	3319697	324198				29301			39064										33261298	36202848	23341750	26639846	46124440	45325332	24160806	19717964	40200992				39576496	43875268	20584716	46830848	30624126	19381510	14951928	18411070	20033396	19813570	18907532
m359	5.849	389.11	w/o MS2:trans-piceid	9164698	734460				13030			17365										16783890	36152764	22699408	27184370	45872104	44996288	18766556	36598224	39416168				29759864	32095646	32442610	36458152	29993618	35906508	14495793	18457260	20033396	19889734	18969186
m360	3.384	389.146	trans-piceid	2443054					4424													9435330	10213238	9513175	9438407	9641428	11132373	8813422	9419155	9832795				7903280	9044945	9324548	10825193	8651096	10534862	5270627	8498561	9639902	8865692	9041594
m361	5.176	389.146	w/o MS2:Loganin	668373																		10326928	7116926	10214054	10549984	11583188	12175601	7001929	5332424	5924602				5879937	5050386	5533286	8436447	14646835	6528390	7174152	9667454	7573674	5466643	4829008
m362	5.921	390.113	Unknown	1402364																		1457106	4597816	3735048	3926616	7542948	2139350	3307706	4843786	5822443				6325170	6806910	5405295	8305414	4392445	6077462	517972	612770	757492	1016672	739792
m363	6.319	391.061	Unknown	2677422	3087180	3245741	1497060	584766	531474	2231138	3049988	1983253	1269762	2231799	1665801	531309	523614	571080	516267	416086	289620																	1150		207833	726876	249421	485023	14057
m364	2.901	391.061	Unknown	13482349	13632517	15213104	19373	6021	6126	3049974	3364822	2236919	1308426	161668	427270	20314	14573	5540	13227	12170	3238	1912580	2698396	2304870	85201	394831		2106240	3112656	3745272				127738			138360	205295	359348	1599364	2357176	2455490	2908784	2679838
m365	6.592	391.065	Unknown	991225	1182833	1232391	2079753	849522	2269020	2733195	1017811	820709	1645511	842301	746817	2136371	2041235	2460368	2185316	2068282	1634915														17896					185271	835591	434527	168245	183493
m366	6.179	391.125	w/o MS2:Unknown (carbon number 16); PlaSMA ID-976	393237																		4344761	5082318	1515549	3098019	5236511	5157656	1387466	4041644	4474578			6273	5031428	5290708	4881976	5808469	4289981	4871463	498959	764091	2214674	2490308	2494350
m367	10.292	391.196	Unknown		333547	114682				45663	23584											1998218	1811959	689394	486714	513725	606826	2070164	2569591	2290288				2125104	620425	2260566	2087488	772382	2746138	907762	1094440	927773	983712	1006435
m368	10.143	391.196	Unknown (carbon number 25); PlaSMA ID-980			114682				164572	84980											2015712	1804490	2420580	2181760	1679376	1869368	2113112	2569591	2310580				2137162	1794854	2296765	2130304	2716597	2776463	1213904	698648	1095439	944683	961586
m369	13.732	391.214	w/o MS2:Flavanone base + 2O, 2Prenyl; PlaSMA ID-981	12519543	18340250	18818580							758348	457035	422499																	13599								286362	819179	713715	779112	233957
m370	6.303	393.084	w/o MS2:Hexsose + C5H10O3, 1phosphate; PlaSMA ID-986	3392331	691253	655818	3194585	3862283	1248076	3020242	2839175	3419542	1909957	3354435	3191076	3021147	3520634	4572031	2861433	2810520	2565356		111478		24090		3034							11944	70803	2628				439691	1873047	370425	1046585	1739339
m371	5.584	393.141	Unknown	854464																		4093905	1427236	2656089	4751124	5384139	5639584	1389441	4815405	4314530				5606736	4662486	1613971	3017516	4024395	5348674	2095163	2439861	860210	1654197	1669239
m372	8.256	393.214	Unknown	2433112	463757																	762135	791991	781001																638121	845403	690843	647431	557112
m373	14.366	393.227	Unknown	10202569	15792242	15550375				15858		14002	2120062	1667412	1129404	103668			82151			507396	1001396	1191339																405934	596508	524038	488107	118491
m374	12.901	393.228	Unknown	6111352	10119118	9410279							248011	694688	634211					67254		2643	5472	5191																410608	626428	717496	436530	132764
m375	7.524	394.092	Unknown	190429												110229				70215	23214	576188	709818	486253		86151		255617	143818	605588	6639										195298	95820	120222	90856
m376	9.805	394.199	Unknown	243996	1055956	453083	552128	815983	1097210		91071	70538	1176569	1064292	1117765	521427	1237838	876272	723505	578605	820752																				136585
m377	5.209	395.084	Unknown	74599	48275	74188	95039	82729	57835	82705	197444	167636	184850	260525	182671	153989	124326	77845	170732	117110	169556	4287908	1067327	1800655	4517820	8576574	9430760	3951117	6844977	6170430				8355270	5765790	1683596	9382869	5628876	7597400	1356252	2039270	2026100	1257560	1779258
m378	6.137	395.099	Unknown	1986671	3281949	3420700	6521460	5359208	5466954	5966842	5588858	3161562	3838622	6542894	3041680	6855306	2511586	4647538	6288493	2827403	6048060	437784	117566	36389	79571	182564	174993	60306	120273	71865				134756	169382	125298	324954	19934	70829	1850047	1673865	2555882	577599	788265
m379	2.686	395.121	Unknown	203632			122		1010	2605		118			147		4696	7238	130			1061174	944006	1299664	1247420	2355879	2177144	1091202	1443319	1386066				2531924	1896921	2223994	1327569	1873113	2218737	1011502	1035627	1000678	990217	997268
m380	7.519	395.155	Unknown					1324551	599985	1044	1383	5267	1180	18800		8209		1187		800966		3564034	4277301	3675035	74411	164447	85054	328176	217267	192053				134645	28242	105106	70260	256573	297056		171649	3987	147164	3195
m381	6.153	397.091	w/o MS2:C14H26N2O5S3; PlaSMA ID-996	1290328	39163	9396	1702	34851	30494	30909	4067	19669	8506	26121		21368	42219	63097	8296	4066	38204	3421948	3520922	3247734	1671325	5340834	5517106	2595032	4856676	4411914				5196690	4785006	4148032	5572352	1799346	3614816	760147	1407904	1971025	2185803	1624550
m382	7.595	397.092	Unknown	93442				2802					10180		12007							730217	1590088	1569643		509554	505800	118098							749342	698962		69829	855872	353210	120399	495200		165357
m383	6.632	397.113	w/o MS2:Unknown (carbon number 18); PlaSMA ID-997	1203922	1475822	1287283	330125	1621181	2104150	1588734	1926692	2088125	830649	934968	1084137	2569081	1175606	2583194	2394694	2166908	758550	2492	51579	499	61	1161	21345	321	854	1603				255984	18054	3169	24626	27557	3808	130085	306608	717941	305206	108727
m384	6.091	397.172	w/o MS2:Unknown (carbon number 12); PlaSMA ID-998	159095	139371	291611	212720	494919	594438	472110	91274	146870	194676	193572	270736	631516	310526	476721	663176	642076	686922						24266											4469			164649		128773
m385	6.153	399.088	w/o MS2:Coumarin base + 1O, 1MeO, O-Hex; PlaSMA ID-1003	379968	33017	47676	146640		15075	22424		2900	15424	2605	18844	3473	3371	103683	13385			1075256	1547326	1087498	474304	1611811	2063827	1060020	1626436	1509470	11843			1214479	1604129	1087942	1837945	626002	1276342	393600	486775	571120	715274	619609
m386	2.818	399.092	Coumarin base + 1O, 1MeO, O-Hex; PlaSMA ID-1003	2172702	3542731	2705629	193314	1030248	2027551	2147167	1679067	1536057	363813	563888	708321	1780342	1177441	508301	688185	913413	258868	563158	438325	427901	39607	3092	3795	600225	419268	577381				19584	24488	12485	17153	4872	6385	737080	570440	582501	655981	717745
m387	11.563	399.167	Unknown (carbon number 19); PlaSMA ID-1004	2918680	2479250	2699720	3153651	3287545	3638907	5379504	5225446	6040438	2626948	3281908	3075836	3564718	2950710	4022715	3077571	2945607	2843007	853311	728153	531395	451938	894279	868229	725401	624068	565351				746225	817264	849987	1044734	562911	511386	1175990	1988008	1814339	1895076	1753930
m388	7.348	401.088	Unknown	115020	1017503	191769		687971	319532	813627	369749	445864	144367	402755	179318	753770	265361	752033	403618	226370	687901															9786	27928			90125		83549	14298	46348
m389	6.125	401.145	Unknown (carbon number 18); PlaSMA ID-1017	583368																		3452285	3147299	2662693	4777978	5127990	5214315	4228798	4998672	5202446		83799		4773083	5187344	5712526	6186684	5287150	3223585	2305280	2391247	2154318	2389982	2448834
m390	10.481	402.183	Unknown	2211039	3358753	4186986	6854602	7672125	7503762	2701716	2622718	2038661	7632840	7992070	7580450	7953408	6499124	8664529	7312518	6126420	6233041								109702											641680	1466780	1254432	1276073	1081806
m391	7.313	403.102	Unknown	140051	501532	166033	155090	1662683	168064	1147300	989733	879365	1126212	760676	550655	646133	1714050	71360	175050	726747	989498											73028								219553	111445	94978	90770	2654
m392	4.743	403.125	C17H24O11; PlaSMA ID-1024	131975																		2773012	2557906	2031246	2153192	1535314	2930637	2557202	3002372	2889813				2700814	1620053	754147	2224219	1466234	2910815	1409896	1307297	979770	684690	472797
m393	7.431	403.161	w/o MS2:12:4+4O fatty acyl hexoside; PlaSMA ID-1026	632050	677562	739129				326017	335421	235693	260407	100747	131040							34056	154629	355741	12420	2749	31195	516017	169620	127988					12189	11335	319792	81140	127927	385682	311284	320198	293338	260355
m394	10.488	404.177	Unknown	1555478	1898247	2681901	4317435	4851026	4599950	1947983	2035550	1633694	4360928	5187100	4714920	4831235	3710561	5097465	4624818	3740862	3835693																			592965	805648	886100	894222	644371
m395	9.768	404.231	Unknown	233104	939974	393300	500783	403528	1060097	211787	273780		957634	1077864	1232090	518186	1557578	396514	344063	527740	1400816																			740219	130875	109013
m396	7.028	405.082	Unknown	975789	1558783	1014101	758513	1032575	1720831	2094608	1091226	2248938	2110868	1866181	2031416	2925682	2360811	2709030	1361110	804465	358129	25621	6011					37923		16118				10459	52270					36367	1290782	359952	354714	301205
m397	7.412	405.083	Unknown	270224	459784	725373	2240283	1334840	1930682	1042659	1192889	1932274	1394022	1329683	424557	684504	1281818	572182	452378	1083066	1383453		97536					1185	6879	832					146071					140161	267333	966060	892008	360590
m398	5.842	405.142	w/o MS2:Unknown (carbon number 17); PlaSMA ID-1028																			1594484	1381761	1708850	1409510	1327612	1790626	2967357	1433394	1780690				3049349	2664742	2959575	1395704	1650566	1463086	602692	1498225	635343	812850	379601
m399	7.774	405.177	w/o MS2:Unknown (carbon number 18); PlaSMA ID-1032	313925	179542	123757				193285	225001	225739	144460	132680	196544							2270581	1979286	1946152		122319	82409	720258	1484533	1088811				231710	387378	327501	662582	583897	701478	373688	354304	430075	539415	628035
m400	6.341	405.226	Unknown		109753		83779	207022	149755			138447	134277	90689	101376	80344			85654	105132	219543	200111				134655	93291				1084542	856067	1047988				104775							111185
m401	6.957	407.099	Unknown	1982384	2576471	2907522	2386738	2799899	1860920	3226330	2795496	3274204	2399906	2922851	2923065	2877952	1906175	3110382	1722301	1836704	2421898									16121				29920			111647	9439		984410	777063	546619	1267654	1009900
m402	5.713	407.155	w/o MS2:Secoisolariciresinol	78413																		2746038	2718989	2910120	2424959	3324719	2855414	2430836	2586297	2765061				2547464	3083636	2340995	2545829	2580882	2783876	1539287	1157238	1620011	457480	1079068
m403	7.769	407.193	w/o MS2:Flavanole base + 2O, 2Prenyl; PlaSMA ID-1039	14447																		2659018	2518520	3090473			107400	680778	719710	678672						238174	313625	201712		245307	855162	732664	289421	252455
m404	5.998	409.077	Unknown	1879811	1622033	2071442	15763	264556	137776	34582	131129	165370	219980	796595	234635	361259	3775	727160	404823	575566	71693	10414		77487			125498		12032						49568	73247	22406		10973	93097	210958	254114	121291	163925
m405	6.593	409.116	Unknown	304440	1127026	1070403	1351265	758382	1142734	1350539	99801	1483180	382122	587926	848687	899436	421222	1512826	946175	304611	168173		10009			13076			378529					34506	26700		3218		37107	66198	63459	501774	8972	36516
m406	10.693	409.208	Unknown	172595	48157	146433																1666544	1976529	1899221	2854369	1322473	1949153	2197830	1404878	1674204				2353220	2195083	2348432	1785313	3312386	2480414	664397	477019	736017	557717	228970
m407	7.836	409.217	Unknown																			679370	654518	874668	313058	521612	874373	894952	533910	688846				773186	785725	753372	847813	798995	481678	271627	382954	218733	196049	269214
m408	12.55	409.222	Unknown	36900652	40138844	52190732	371				2546	843	4940637	4866954	4376270		368			518	439	779521	839477	1125042	2366		361	545		356						2741	8776	2770	4292	3134189	3935826	4350106	4062135	3248752
m409	10.49	412.21	Unknown	683163	1778691	1321999	1775465	2174441	2330470	1227355	998559	610347	2426688	2630200	3143736	2321928	2922543	2015359	1998110	2395753	2853160																			523771	424700	555083	247977	294979
m410	4.847	413.095	Unknown (carbon number 18); PlaSMA ID-1046	65841688	4411660	42115	41569	49981	120742	58146	52728	76645	29691	40090	111062	53650	85956	84143	94743	45508	37975	210635872	189281888	168348832	193836832	245849584	2850690	148465280	197513328	105797720	56490	79577		225274384	216065520	208416736	229580672	144534752	208343376	117462320	151578480	155654528	158136528	148889696
m411	4.738	413.095	Unknown (carbon number 18); PlaSMA ID-1046	1157053	4411660	44140	36906	131689	85484	62270	50579	72202	30427	34634	97717	59548	55010	239347	65004	39051	36428	210635872	189281888	168326416	193836816	245795360	233663920	148465280	197423776	105797720	22006	192061		225274384	216398928	208416736	226301888	144221280	207765152	1416157	151321264	155632128	1847363	2100256
m412	5.946	413.11	w/o MS2:Unknown (carbon number 18); PlaSMA ID-1046	1317866	1422590	3639375	5165056	4626778	5371897	3901222	5307970	5296212	4595518	1658170	5065323	5350082	4763666	4748736	3947464	4112063	4661814	4725728	4505543	3430071	3866552	6021748	5639766	3484956	4400017	4704926	3122			5392345	4779016	4365336	4857321	3205541	4190128	3140216	3389313	3290665	3491336	3396097
m413	8.367	413.146	w/o MS2:C16H30O12; PlaSMA ID-1048	3282		24891	12875			2561		4918				33207		110316				3170181	3530240	4107932	2177532	3025388	3477532							3649802	2535504	2153208	3815376	3138516	4288912	457960	1320181	1018469	595517	697807
m414	10.524	414.207	Unknown	247834	322299	333833	426699	379721	514132	472456	353672	384734	1161718	876193	1001374	322711	466487	459275	262232	590686	595141	185159	173385	373236	59917	38171	97720	72636	56922	54124				2573	20965	4142	48564	82141	39684	95612	246463	254718	109355	192709
m415	7.534	414.213	Unknown	490912	309272	638875	973572	877233	950117	467535	472953	512090	676788	822036	1043828	900292	906426	1098119	1020698	892625	1050676																			228488	351572	264810	90788	293408
m416	2.821	415.088	w/o MS2:Daidzein-8-C-glucoside	3621138	4116669	4840318	584224	458747	595338	2333444	1492033	2208562	1470544	635340	684559	249653	664467	258620	507074	516260	242283	1379754	1387275	1345487	705537	804830	198815	2111073	1655673	1511380				217478	263037	240956	274494	496992	941515	1091627	1027179	1530775	651202	1310556
m417	7.044	415.16	Unknown (carbon number 19); PlaSMA ID-1058	986863	430905	3558	20658			39095	14590	19927	3381	13813	27958	2919		3154	11797		11586	2051033	2269417	1710286	2596355	3302382	3953486	2827779	3612804	3530926				3620799	3727275	4038498	4129064	4144413	3368387	2319606	1870743	1836958	1579224	2349077
m418	6.922	417.082	w/o MS2:Unknown (carbon number 20); PlaSMA ID-1064	286896	916295	1317614	782736	1200772	775974	2300919	1325041	1662696	1015023	1487264	617098	1433872	1152598	142985	350312	472367	234779	2278	75640	92946		89466		190305		75345							103754			225607	350380	130572	263966	512055
m419	7.213	417.082	w/o MS2:Unknown (carbon number 20); PlaSMA ID-1066	151059	380466	1317614	312179	1149860	279771	646010	392185	673410	277310	422978	139304	1433872	415816	607238	1029838	1258323	846368	18229	9455	10785		10653		90989	10198	72991							12968			179222	87511	62750	178220	425435
m420	3.222	419.154	w/o MS2:4-Deoxyphloridzin	2726223																		8501413	8958718	8668018	7517654	8503370	8533878	6441252	4966279	5365124				8483403	7792558	8405414	9036191	8169104	8678537	6461202	7298144	7050774	6980036	7061289
m421	5.707	419.155	w/o MS2:4-Deoxyphloridzin; PlaSMA ID-1080	1293994									1805	891				3975				3137990	3410146	3201178	4538502	4783222	3503739	4385673	5120774	4629382				5207336	4858508	5076212	5233363	5192538	5403656	2454396	1799534	3123114	2215901	2475742
m422	10.411	419.192	w/o MS2:Unknown (carbon number 18); PlaSMA ID-1081																			4120406	3690156	3231113			171866	150389						20027				63994		185915	245366	75303	221390
m423	11.001	419.217	w/o MS2:Unknown (carbon number 18); PlaSMA ID-1081	2014880	1345304	1149026	1037833	906923	864551	7731114	6589256	5929848	153226	209166		630808	719331	551024	1071013	2299653	2313434	2638349	2129197	4684945	906871	309571	444173	2393565	1729893	1168989				173390	89680	100606	452612	1636588	606875	4559172	3901388	3428131	2824020	2468826
m424	7.329	421.115	Unknown (carbon number 17); PlaSMA ID-1083	8901078	8002406	9446067	2876835	3696487	3175988	12171635	10617413	18224532	6689418	8011892	7386165	4116314	4318608	4922290	3828989	3559060	3343512	2790764	1919617	2332514	562652	566964	879902	839854	1763816	1735938				298889	187796	692760	1337860	534462	769379	3142639	3218429	3612588	3786983	3560486
m425	9.921	421.193	w/o MS2:Unknown (carbon number 19); PlaSMA ID-1086	238901	86197	1768102	610764	711605	977609	1043463	626386	776914				656363	694116	390823	1696047	1241453	1116820	236060	180350	93110	1357										57049					156123	277545	147882	121717	85947
m426	10.915	421.208	w/o MS2:Unknown (carbon number 19); PlaSMA ID-1086	241276		1935																670439	662422	460671	258662	114606	492789	840106	1843687	1174540				396263	600748	582656	564320	319982	346358	426839	744174	609013	991887	495735
m427	10.481	422.24	Unknown	667308	2833162	1485563	1684436	1728246	2380789	1425133	1155081	776423	2762170	2460583	2980333	1718241	3499370	1580148	1767968	2784155	3368468																			1196898	1010838	738702	329984	433724
m428	7.072	423.131	Ginkgolide B	2623005	3163900	2925496	3809672	3825107	3711722	4513440	3536655	3738858	3833671	3394072	3556014	4463024	3677323	4116467	4324348	3421595	3465448	374255	212249	246009	340719	37452	233811	418819	80617	176268				163049	118391	301897	285528	161221	271251	1864763	2398864	2193849	1463136	1589582
m429	9.749	423.203	w/o MS2:Flavanone base + 4O, 2Prenyl; PlaSMA ID-1092	4271378	3917208	7526728							487819	254588	136667				10887			16939		9524				28918									11982			22387	104482	170701	227813	215608
m430	4.804	424.11	Unknown	1779683	3409463	2699473	3570980	4404550	5410623	2204762	1830524	1734835	4613540	4235864	5295599	3710034	4473399	4218792	4562532	4652154	4222482	4927																75493		1243732	1016574	945921	1023722	836993
m431	2.431	424.162	Unknown	3125518	3747371	3705046							151555		109223										6422															97263	250014		156808	271326
m432	3.691	424.163	Unknown	706351	1208665	1166977																																				75913
m433	6.123	425.11	Unknown	1108346	662599	1868169	2374070	2246482	1929871	2446925	2422006	2384954	223530	2443944	2052352	2126210	923433	848564	780485	1199760	442353	27280	24386	2018			12327			44520				7128	4047	1807	1572		525433	198738	419776	610488	582297	768490
m434	9.993	425.218	Unknown	4852575	4682976	6876749							137881	1383134	509564								12917																	105625	242543
m435	9.351	426.225	Unknown	8125059	3205513	145764	1811	1526	1699	2935	3053	3634				1571	2172		3933	7690	4922	1842872	2375752	2022856	140257	645497	806264	3135682	4396841	5191838	204853	209979	357898	2765142	3114771	2717653	520941	153598	518113	2483156	4028942	4867669	5214944	4594544
m436	3.001	427.028	Unknown		102998	122142	787047	862704	664412				758536	649061	458283	958914	662761	776737	526667	780669	608687
m437	5.494	427.088	Unknown	3836704	1419448	550059	164414	114089	434384	156597	116472	296197	45906	211447	411342	106375	43533	32190	247544		206222	7243996	2630026	6417093	7207404	3566604	8738484	7404496	7628720	3244091				9426597	9063802	9442073	9064826	8193084	9450528	4231076	4918227	5245236	5308930	4350826
m438	4.006	427.088	Unknown	2353554	26311	147418	69184	404778	321136	174561	174912	579009	329249	323774	182639	192374	287177	15812	756331	121225	20979	7431147	8129266	6112292	4623522	10916000	9228828	4737528	7438680	8494323				7321544	8816004	6100659	10110505	4563326	6556345	2959834	2945232	4328256	3504258	4128956
m439	12.155	427.175	w/o MS2:Isomajdine	534954				2638		473												2051416	2346213	1905118	1005616	1659535	1796062	1766684	2410069	2018118				1636312	1543052	1488282	2617046	857592	1683471	280553	683610	909903	783790	879975
m440	9.86	427.175	w/o MS2:Isomajdine	8583877	167561																	23401588	25052666	22054498	12999037	26259614	29196084	19430706	22698752	23720248	79178			27006454	25485530	23552578	28542930	16960904	24711704	10909196	12793807	16787750	16935968	15594346
m441	11.998	427.22	w/o MS2:C21H32O9; PlaSMA ID-1102	319033	758962	45385	238297		142733	200150	461568	127295	379715	187152	92338		265378		163834	320619	245327	998279	892978	1140285	1560484	949401	1039380	1496470	1068025	1230516				1251393	1134869	1301005	1214800	1742189	1440614	730211	914651	921638	838125	863825
m442	9.357	428.222	Unknown	2317823	633183				6658													532314	566015	554976		158530	101932	575363	1401723	1270828			113473	773410	1070079	901999	103124			1023465	1191988	1685225	1584830	1722101
m443	7.564	428.231	Unknown	422754	852840	266599	735269	568128	1071751	411546	279796	299310	680432	770680	720327	870735	1248955	823147	674076	697000	957848																			222989	285993	172539		88474
m444	5.577	429.119	w/o MS2:Formononetin-7-O-glucoside	176869	2573	36410	10651	25004	34191	21718	46876	113497	7121	50211	123853	139493	40719	86079	51727	3471	80309	905254	1056160	1142844	557492	836770	1035461	549885	1135572	918388				1011610	945431	1102247	936103	843898	1001975	177620	605057	317260	520714	617784
m445	9.855	429.172	w/o MS2:Unknown (carbon number 19); PlaSMA ID-1108	2713558																		7732468	8604324	6667330	4084752	8130276	9638649	6683604	7056834	7816588				8645836	8701746	7444273	8924618	5152158	7946174	3348823	3927589	5502425	5905924	5079145
m446	12.797	429.249	w/o MS2:Resibufogenin	1633894	2098984	2674475					144228		101076						76704			275837	325513	361413				24549												25387				3101
m447	6.832	431.099	Pelargonidin-3-O-glucoside	2437742	1848217	1842942	2232022	2853291	3185067	3139667	2636740	2352390	2383268	3198472	2291083	4086936	2176583	2629355	2481731	2232421	2116301	277666	321317	349073	301065	344455	389494	379203	411000	322810				302373	343662	368035	355926	391321	567427	827177	1062372	1232538	1171554	923441
m448	2.571	431.133	w/o MS2:Licoagroside B (Not validated); PlaSMA ID-1123	2895360							28710											8430037	9259476	8371710	6438388	11061051	10584298	6956586	9242912	9792328				9970146	9777832	8849611	11363526	6534862	8773216	3445000	4647496	4394942	4983190	4754160
m449	5.527	431.135	w/o MS2:Licoagroside B (Not validated); PlaSMA ID-1123	1706000						8065	34661				9007	13935		1809			17314	8970985	10068259	784116	5171306	10064224	9825988	6908544	8393547	9586161				9520623	9565900	7858597	10660133	6357934	8832574	2418912	3603742	4349908	4433318	4345760
m450	12.553	431.207	w/o MS2:C21H28N4O6; PlaSMA ID-1128	1478303	1988869	2345888							97604
m451	7.423	432.087	w/o MS2:HDMBOA + O-Hex; PlaSMA ID-1131	2505814	2865594	2708041		15475		196353	154203	260599	419700	270991	42306	525		44930				248033	681441	531043				1147625	1281309	943817								185562	103173	367574	230224	339975	503400	498527
m452	7.572	433.097	w/o MS2:Flavanone base + 3O, O-Hex; PlaSMA ID-1139	3227909	3100765	2559790	72190	447531	26086	358099	517778	10456	5152	10054	6932	22477	17346	6641	3721	771842	398360	2662068	2607772	2603316				11436113	7546844	6671028		81353						178151	143064	373079	985457	1246687	870280	1109781
m453	6.849	433.097	w/o MS2:Flavanone base + 3O, O-Hex; PlaSMA ID-1139	9988540	15500788	16596015	2461536	271140	181955	166542	776591	13762	1323088	144434	1492014	27647	32864	2919940	2669884	3062040	34849	1258078	3161823	2494376			3981595	4365290	4602522	4913874							79877	419076		2478355	1546927	1446734	1567312	1776726
m454	5.475	433.134	Geniposide (Not validated); PlaSMA ID-1140	3219201	134816															408		10161881	10443010	9853938	10416606	14407609	12551808	9865854	12205545	13063923				13406304	12331590	12081551	14929150	11360879	12913159	4823872	6013101	5558198	5311003	4724175
m455	4.241	433.135	Unknown (carbon number 18); PlaSMA ID-1141	4096246								8746										17138558	21462944	15449837	10799301	16593673	16498292	14753297	19032248	16449773				17947766	19894838	13807396	17897192	15471016	14691823	7057581	5978723	7446019	7832082	10546688
m456	4.738	435.078	Unknown		4077	8107			467804	18620	5614	25642		67011	11668						11808	569976	363232	225501	557524	422620	516109	366047	520784	243036				501144	357627	406545	350745	252694	624488	323837	270004	144917	116021	133449
m457	5.877	435.093	Unknown	3759932	3725981	4700460	291781	323388	501098	4715250	4608983	6315946	2039622	2617477	2273147	1225290	1106622	2953292	643394	541642	247011	1615024	789566	993153	1578	172215	3089	255734	948230	814985					4794		366467			1005308	1492314	1335525	1818074	1479002
m458	9.354	436.255	Unknown	1034769	453442																	202481	316792	477585		105712	82881	752004	925768	806388				435733	438901	447300	73776	159931		1128490	896074	868294	547453	619768
m459	6.057	437.111	Unknown	1046666	1940877	3623543	468494	925831	1102563	1482504	1110173	284180	897199	928039	1226159	1248774	730859	1490363	1377569	952449	414212	68141	136917	53073	477461	84036	133495	134266	190400	155649				103771	226515	79469	182962	281297	81710	310641	32478	21815	109348	135601
m460	6.824	437.166	Unknown	2790655	1511295			95323				80947										3570030	3976666	3497494	1354594	762980	1173720	1991887	3071239	2497753				758855	480129	251664	849927	626550	1583979	1381334	1702896	1920906	1363429	1748131
m461	9.846	437.205	Unknown	125330																		3624339	3333334	3567212	3728687	2494318	2408612	2306947	1681372	1124748				2776936	2508711	2796204	2203492	3579789	2949076	1922483	1267326	715354	1269384	844677
m462	6.398	439.124	Unknown	1575700	691744	1233788	1227594	1370818	739155	826545	616964	3015752	733080	560395	685332	716080	1068495	2591338	2619436	647938	526711	184949	424215	124059	7378	592484	803753	620755	626748	1186804				1055475	517146	516974	1254856	863258	320594	473964	972126	615658	342538	1083573
m463	6.589	439.124	w/o MS2:Ginkgolide C	643037	771357	1930789	1962487	2583840	787979	2332609	2078733	1056904	2045342	1379295	1943724	796781	1634509	2591338	2113030	752404	653820	219776	511221	406469	15830	608221	234253	885081	647334	982748				831461	483419	487654	1279088	621078	296696	979380	1350624	739721	952739	1083573
m464	6.722	439.124	w/o MS2:Ginkgolide C	481596	1838365	1930790	1962487	2583840	2090993	2332609	2078733	1014520	2045342	1461253	1943724	2171204	1634509	938233	2113030	2187098	1575031	255160	291297	406469	35620	500252	187584	699618	377432	449446				404334	213368	182140	1005812	863258	120899	979380	947859	1969929	952739	410256
m465	2.483	441.082	Unknown	291551	6302	44329	35018	5072	6792	10260	743	10990	3917	1078				4742	4220	13354	30588	368891	770340	331345		10370			503								97520			2076	1314	91072		98727
m466	2.921	441.105	Unknown	1055805	1898720	1922388	272845	871218	400026	1972738	1194763	1043869	418207	241078	974430	112259	286425	116142	481942	412523	370820			89429																161619	442865	269570	135282	115842
m467	6.685	441.141	Unknown	1850673	793606	1384576	1597469	1425061	1920674	1977116	1602712	2300356	1644554	1584865	1448534	443503	1855444	1939244	1268558	1696632	1527664	709382	426816	342874	511889	581688	1689351	1096998	1898464	602273				1782631	730163	1478806	2190260	1837999	2025825	1486722	910184	813976	1952350	1843232
m468	6.848	441.142	Unknown	1320765	793606	1395957	1596050	1425061	1880960	1969061	1602712	2300357	1644554	1558934	1497556	1479110	1855444	1939244	1303341	1696632	1455322	605808	275505	195758	357438	433564	565714	360575	601726	384227				588318	618095	564698	825489	641784	640932	581355	882199	2088253	800282	629688
m469	6.488	441.142	Unknown	505331	194827	498210	346242	483178	479372	639351	336136	617350	309040	249462	304143	249351	367817	413573	385507	446010	413093	1722278	1269201	1120154	1267435	1598985	1689351	1096998	1910364	1489071				1782631	2093472	1468659	2190260	1837999	1907692	1486722	910184	650321	1952350	1843232
m470	2.511	441.161	Unknown																			1562274	1012592	1651650	2053221	945773	1056210	1485329	1313518	1225942				1252238	957348	1751917	165134	2249651	1748393	486045
m471	5.505	441.162	Unknown																			1199580	722012	1370167	1327648	652490	884422	1136080	1111504	930801				1046821	1055950	1235864	555774	1955716	1461130	761828	335298	122001	9772	14980
m472	15.45	441.253	Unknown	7571431	9557517	6344760	1963200	2516000	3979277	6539802	7303222	7597688	2461741	3091282	2298705	4205336	2598899	3540474	2188562	1856650	1963509	1772053	2695886	2025742	348975	964981	1015205	2177131	2389054	2555698	1452544	1742206	909520	928309	842063	992507	943809	318371	1004480	1042658	2292890	2718139	2164540	2003539
m473	6.38	442.103	Unknown	3543681	2830517	3646077				35029	2943		2198		22552	2877					10417	161824	523270	838831		83039		1100806	1174592	1342498										266127	198616	322775	264494	67252
m474	5.295	443.082	Unknown	1192421	1827629	997000				380053	288801	141618			86316							250768	404501	222596	2562			433107	170473	423449										344799	326309	364979	139720	128912
m475	2.856	443.082	Unknown	10863107	11009017	9809153		40415	84389	3393314	2657525	2971371	1020511	347982	928418	148940	4253		188667	13546	101335	3330236	3670952	3572749	467209	400855	159126	4409465	3503227	3786024				430882		18492	223478	734152	644571	2921098	3134131	3034842	2842651	2894200
m476	4.72	443.141	w/o MS2:Diferuloyl glycerol; PlaSMA ID-1172																			7738134	5340536	1671391	4515042	6122974	4882140	5249792	5009666	6527376				4941838	3786210	3060289	4584679	5254440	9991010	421293	221215	283661	91917
m477	7.553	443.19	w/o MS2:C21H32O10; PlaSMA ID-1175	605389	938535	805828									87189																												91833	167140
m478	12.342	443.191	w/o MS2:C21H32O10; PlaSMA ID-1175	952520	655563	1295964	1405260	1587035	2402433	4707802	3393970	2492068	1053048	1299609	1788162	1288369	1137833	1832173	669020	1137535	1715496	119679	347484	134147		103115	249490	118801	258126	245364				491964	244875	5759	214260		185444	211758	800635	621468	802206	389198
m479	12.235	443.193	w/o MS2:C21H32O10; PlaSMA ID-1175	1282291	635608	480372	1053921	1587035	2391616	4740462	3391538	3993608	1524984	1963891	1722784	1721233	452671	1832173	625704	1816885	1715496	249653	365788	140102		101034	260479	104045	277132	246247				374293	390819	11717	566285		80075	245664	800635	794617	802206	134021
m480	10.7	445.183	w/o MS2:Unknown (carbon number 24); PlaSMA ID-1185	14087145	1112208	11390																46000124	46589368	39646868	32985954	54103152	57906360	54368340	62969624	58215352	126027		264663	59106552	58506672	55394440	62136516	38356288	53802928	13304465	17753688	19265220	21838938	18135830
m481	10.9	445.244	Unknown	5457718	5715937	6871048		174293		3767365	4091337	4279120	1225683	1073049	1481345	82145		118359			162706	7797644	2764059	2722666		126685		1152776	1597231	1154164			22899				227130	367284	150913	1689143	1855044	1922355	2346269	2040966
m482	10.739	445.244	Unknown	1858425	1896339	2290744		221404		4912452	4091337	4279120	1225683	1073049	1481345	84794		122175			167952	7797644	7365563	7292060		126685		275847	1296355	936477			81423				101066	119053	150913	2207554	2384041	2397098	2388660	2316838
m483	6.905	447.092	Luteolin-7-O-glucoside	2569669	3804552	4452616	571351	873453	1356438	3575331	3071862	3629360	2239938	2486121	1091905	2970398	3024526	3957848	2229093	2656422	2850269			179702	141954	79352	104317	233354	170794	273161				1939			222435	55458	29936	1036994	1365152	1753975	1274258	383517
m484	8.046	447.095	Luteolin-7-O-glucoside	326096	462158	260281	219583	161657	231564	3532810	3155134	2932328	23866	230442	228935	218636	364659	711244	391332	64722	213250	2634	149626	316205	212900	383663	235636	3153458	3270622	3051578					125444	89041	179395	200086	12792	769086	980978	944263	1033402	1005991
m485	10.7	447.183	Unknown	4516695	279470																	15604256	15830984	14217855	10854957	17705684	18857526	18120912	19962820	18942278				19429804	18793966	18475588	21106908	12768133	18455518	4455068	5862170	5992898	7313910	5744823
m486	6.427	449.107	w/o MS2:Unknown (carbon number 21); PlaSMA ID-1205	1249418	639345	2194109	967840	2284999	1240773	2250660	775518	540238	322791	1294394	1511463	759260	588043	1476710	900838	831786	1207601	71339	24515	85223			34623	198385	275640	42245				17014		2595	48759	9471	17400	189893	77748	377630	739743	297007
m487	6.652	449.108	w/o MS2:Unknown (carbon number 21); PlaSMA ID-1205	221787	1108108	505945	2843462	2284999	1085174	1663532	870064	1127245	336777	337036	328322	2928476	1377604	1950114	1972166	2495704	1292981	71339	50002	85223			3848	198385	275640	159954				17014		23356	124356	38186	17400	319248	222898	769120	739743	635116
m488	4.984	450.127	Unknown	2896426	4331551	4471990	8339670	7978478	10238635	1158140	455793	965890	8743872	8314287	9001888	8700610	7983886	9223804	7182345	9783003	9293812					3503				1768				7821			49907		3639	1500612	2292940	1364820	1206478	1472731
m489	2.947	451.088	Unknown	4710434	2608697	7603358	1409910	1518586	1467403	8946760	7358170	9623504	3552292	4274429	3943552	1590598	1438472	1523100	1385981	899213	1570147	1777258	677801	829223		127444	287474	229058	595674	627679						248109	175962	78974	51843	1497963	1697801	1885367	2114460	1970058
m490	2.87	451.088	Unknown	4710434	5302094	7603358	979992	1033499	1004998	8946759	7358170	9623504	3552292	4274429	3943552	1590598	1438472	1299052	1121768	899213	1570147	1777258	1181598	797767		132079	287474	236444	1172183	1309260						280577	182721	81761	191041	1698109	1657935	2107948	2114460	1970058
m491	6.691	451.088	Unknown	6638454	6296158	7021631	599201	466133	349976	919839	1939977	1867721	3938954	3158216	3863340	1027819	2394377	1284485	940020	340404	255928	1307028	918080	776309				557184	750430	611163				370516	351812	148606	1103862	1087775	848745	1315801	1489727	1676193	2789282	1359889
m492	7.628	451.182	Unknown	15168862	8192725	113629				280345	168759	518625					34210	9559				18428618	18829822	16685209	1464041	1810243	2796827	7709835	11706879	10330614				1673529	1234056	1802730	2921860	2795422	4411480	5084296	6616015	5823445	6764074	6063950
m493	7.528	451.183	Unknown	15168862	8192726	358867				167346	168759	160216					9931	2775				18428620	18829822	16685209	1464041	1810243	2796827	7709835	11706879	10330615				1673529	1234056	1802730	2921860	2795422	4411480	5084296	6616014	5823446	6764074	6063950
m494	7.794	451.327	Unknown	556420	938181	703046	1299030	1109449	1252171	1334298	951487	1208450	1029395	1184508	1492932	1121369	1664946	1018069	1218376	1458573	1395095	1024825	1035771	1017740	1414355	1033185	901585	1132022	1393388	917369	2097282	1843223	2823405	1327894	1177884	1616027	791893	1778349	1316954	1695152	1117158	1198262	1105891	1078818
m495	7.687	451.329	Unknown	598655	991926	774071	1299030	1135462	1252171	1334298	1009851	1213880	1057112	1184508	1492932	1121369	1664946	1014986	1218376	1458573	1395095	1097199	1081738	1083150	1479959	1033185	938894	1132022	1393388	917369	2128174	1788313	2706354	1377054	1249088	1633393	755262	1878386	1374195	1695152	1117158	1230949	1105891	1078818
m496	6.576	453.103	Unknown	3129886	2825872	3327484	295155	129949	540280	1550796	2120615	1257764	427264	573300	104337	202918	195620	1524136	489310	283542	214046	1483330	1045905	1407537	2734	2809	5032	142927	305385	468875				3401	8553	1991	1573	1529	8625	588530	1042073	1286435	1757446	1209848
m497	6.408	453.103	Unknown	7457920	7364232	8620245	405088	196815	540280	1268401	2120615	906876	501814	243231	192257	670843	739218	1524136	184910	914846	687627	643397	1059369	1853946	6551	6212	11757	142927	254068	468875				8236	32555	11428	4331	4986	20916	1549599	1042073	1286434	1757446	1209848
m498	5.236	453.104	Unknown	2686676	3475980	3807678	3088	110238	48699	411188	538580	1024358	158481	119124	168265	413600	360054	76449	64601	3036	2716	27978	3662	254634	6593	2922	5195		129567	866				8856	5564	12830	1553	3193	8116	59700	391915	191409	453493	224287
m499	5.866	453.125	Unknown	143853	26326	48577	6473	2820	817354	1672978	18556	1412737	15693	4822	29846	6885	1849	3816		1524	1232	2504907	2520436	2112970	1763570	2217714	1649377	1397725	2484277	2657070				2695303	3050580	2150342	877851	1689418	2494083	234339	432515	121758	196746	164398
m500	2.899	454.098	Unknown	1217009	1570468	1152212				659008	444534	366205					54345					496282	488903	585430				348337	283138	721229									131121	193351	510117	664152	586988	470116
m501	10.863	454.223	Unknown	1275146	1668804	2004183	350055	302619	503823	1973360	1777202	2543957	387753	382422	437144	333511	200727	454915	1200443	1560346	1178656	3718328	3899982	3998406																1899787	1709982	1134503	1534038	1164789
m502	8.776	455.028	Unknown	206750	89273	150456	873238	770702	748342	2434219	4729364	2301029	435540	1067552	901579	89547	264526	110373	112800	442884	250925	2454872	2149338	2137122	1136433	939964	740656	1445895	1543538	2120384	2180779	2449897	2863265	738326	712648	860927		205146	536704	1089751	776366	1379015	979282	1113227
m503	6.413	455.119	Unknown	1245884	425381	1405094	1771106	2457588	1779274	2570216	2665867	1400324	1167063	1492636	1423518	267197	1276813	2821033	1466418	1033790	940456	158172	29828	44490		735774	599307	263228	488947	32253				532340	301526	96759	175209	140430	67914	434905	152107	742170	915731	116197
m504	10.7	455.214	Unknown	611318	70685	39801				143475	98531	149113	91507							113844	66070	4783988	4498962	4719759	7676858	4599284	4348445	5323049	4802344	3412295		30921		5628422	5503432	6894308	4589636	9090324	6445708	2378343	1817161	1504695	1250588	1269032
m505	18.819	455.352	Unknown	2132209	10081153	1731727				170694	141810	99562	3217253	2116149	15911305							164063488	265952944	328137024				1207871	1177030	763781		495228	83624			103071		27042		15553692	10947492	10877122	7375899	10114485
m506	14.74	455.352	Unknown	1162478	1359348	972730		323119	161490	9821995	7737172	10321539				402779	395924	458099	414372	816333	409759	4054546	7962640	7917116	249318	176601	193943	1653515	1484298	1212917			21266		128772	144830	297211	380208	224144	2886007	2887374	1980284	2767432	1955987
m507	16.551	455.352	Unknown		84463					78775	26100				83959							1949063	7159840	7186642				352568	24942												111575
m508	2.869	456.188	Unknown	5145096	7893191	7186592	84471	53629	22609	3245190	3264660	2376076	716851	403328	1030938	165504	13189	37674	164642	69189	81595								90073											1297953	1071709	1114192	1203262	782574
m509	8.758	457.024	Unknown	329221	100840		584244	507816	509922	1636936	3175745	1608644	283151	514281	606615	115964	148554			163401		1473786	1330747	1396379	740750	712746	376755	927707	1031577	1206340	1255021	1867779	1902420	341466	344628	512600	88157	174303	356274	664876	521213	701988	817169	719451
m510	12.712	457.281	Unknown	301798	27253																	6711114	8400688	7590007				1841552	2487077	2271561								9833	80874	365643	292786	1127404	867831	561149
m511	6.441	459.148	w/o MS2:(-)-Podophyllotoxin	403414	89394	130558	60415	30042	28444	115644	107740	132402	125554	19934	128471	100410	31910	66462	19443	84695	43099	710290	2689775	2274058	1206002	1893220	2347773	1347575	2965202	1987071				2667338	1391442	500423	1988889	1849133	1826598	597800	418084	616848	539822	866878
m512	7.664	459.149	w/o MS2:(-)-Podophyllotoxin	5456574	5456073	5887265	6471901	7691638	7254867	7134909	6672193	6545128	6843729	6620322	8073490	7867678	7701490	8176246	6581984	7639251	7727200	584073	467719	449723	740560	836269	634583	427800	775437	690537				1069054	371454	1413916	577712	965991	773834	3324748	4289051	4822305	3691624	4174232
m513	9.16	459.15	w/o MS2:(-)-Podophyllotoxin	1089586	609855	497099	1300456	1487928	1509490	799407	652652	909494	1590417	1242243	1377591	1556605	904204	1721324	1761419	829244	1293182		3789												86276					16233	380757	445939	43219	414116
m514	11.092	459.153	w/o MS2:(-)-Podophyllotoxin	563671	577977	629815	569242	530202	773177	436213	483315	452539	734314	751555	750608	709863	758519	589046	641806	456844	507540																			162643	117181	240016	97124	261218
m515	9.485	460.154	Unknown	170290	23236	14746		100053	65816					11535		39992		110427	34780			1444204	1039852	1136429	1209125	1441822	1366724	805915	1643239	1729167				1634657	1329881	1597973	1620876	1417964	1438049	178040	130152	282406	222057	180531
m516	7.89	461.108	w/o MS2:Isoflavone base + 2O, O-Hex; PlaSMA ID-1247	1743951	2492173	3292132	24067	323017	334740	102458	1073462	426540	867669	350946	1463154	96764	248343	134341	93139	652959	169466	11973	269131		3318	78924	151340	30563	160692	308814				113723			376285	192565	84189	20666	361829	803460	283607	820497
m517	4.755	461.15	w/o MS2:Phenylethanol + Hex-Pen; PlaSMA ID-1258	960436																		4580966	3870976	4978244	7294079	5293042	4097648	5250982	4783352	4719733				4583938	3670064	5595828	3535916	6903482	6964262	1980061	1196395	1377350	1006472	979071
m518	6.062	461.17	w/o MS2:C19H28O10; PlaSMA ID-1260	1891151																		5752066	6542514	5747678	4672276	8017169	7259964	5153176	6339383	5835968				6799902	6841838	5602220	7978209	5403774	6139440	3644431	4789764	4272663	4760659	4572557
m519	5.291	462.131	Unknown	850094	11285		3273	2499	140			377		3573	1209							4535070	3233461	3857344	4129358	5321086	5513372	6511760	4401108	4387979				6483408	4402298	5801778	5869253	5928722	6269078	1100212	823868	556892	1088261	526828
m520	5.151	462.131	Unknown	343069	25398		609123	8608	560					1587	2720	459						2117373	2819261	3825390	4129358	5351340	4083384	4009377	3261380	3807418				6425807	3767633	5638598	5883839	5908972	10613852	1100212	293300	1287382	418817	373549
m521	10.299	462.235	Unknown	950412	335182	387215	349117	241701	200285	4343031	3196139	2944696				425286	239112	186780	494151	703963	813176	982459	798164	660679	557939	352096	493159	1856435	1449084	1488201				128223	234836	524907	837960	1039126	1046904	1222151	1213570	954006	1206922	1125135
m522	7.561	463.088	w/o MS2:Quercetin-4'-O-glucoside	2408821	2135472	1787275	33614	326375	419913	5802554	5925240	6220044	121234	289688	447750	360968	673598	820996	267883	171412	144069	847729	437650	566027	1252420	1394300	1513420	6581530	6158946	6457871				109796	118699	285798	324876	264015	251824	1459845	1846491	1575377	1784611	1725856
m523	6.259	463.089	w/o MS2:Quercetin-4'-O-glucoside	4698630	4834514	6251479	346971	1709529	891993	2576501	3277344	3039326	639760	1239448	919931	358676	368989	315915	400207	529410	400169	921849	782935	984095	17811	154760	3022679	76073	597449	686041				146070	161059	128790	144508	28551	51722	1431651	908035	893582	731241	1200044
m524	6.433	463.11	w/o MS2:Unknown (carbon number 22); PlaSMA ID-1268	61601	142664	330307	1193350	1558024	891993	3750573	3164358	3039326	29276	1919344	89531	1176214	963883	1034408	48403	454723	57171	2251118	2461784	1978291	1458622	4047138	3022679	1631262	2119139	2735855				3224622	3576836	2523190	3341868	1771522	2999959	340214	908035	843512	734619	687661
m525	8.905	463.254	Unknown	407463						825072	545683	446545										506181	822487	784861		70048	943982	1009695	806400	790634							605066		953018	80615	331606	223947	240228	200597
m526	7.647	463.254	Unknown	97852																								925413	976140	540141								68218	122054	81873
m527	9.11	464.207	Unknown	238637	338695	245144	1416005	446261	1182661	96986	15586	2464	1090971	1758419	1440259	654033	1342694	1835507	1308411	1304848	787602									1260								1731			2603		2327	11127
m528	7.554	464.207	Unknown	1533586	2037204	2367804	3505448	4104369	4021830	1889166	2114920	2264233	3299156	3541456	3754190	4144832	3368608	4349668	3995106	3594386	3245422		9790	79585																629345	1423012	1351069	1124965	1273048
m529	5.663	465.068	Unknown (carbon number 21); PlaSMA ID-1280	5861990	7725576	8244712		99913			2717	14335		1818417	106472	27116			150182	85880	10140	7706	9444			2013	3214		4498	3536				3735	4975	2695	10647		1310		124158	216584	217163	386832
m530	5.823	465.102	Unknown (carbon number 21); PlaSMA ID-1280	1692403	1826304	2928923	570174	466230	459265	3170857	2072364	3830535	1535450	1818417	1211280	547058	701098	591135	236969	367856	809736	30260	3893	11121	357	85658	11742	30340	23351	42555				55648	69244	55777	75287		49273	85559	195219	756215	117385	456146
m531	6.614	465.103	Unknown (carbon number 21); PlaSMA ID-1280	639083	895607	441372	1500088	654213	849388	733019	626894	504295	310552	621036	690552	747516	1793687	2372109	2194960	2304472	807393	28736	31026	24826	1427			11422	52113					36144		165610	62582		4450	588143	198513	262172	360188	542982
m532	7.348	465.103	Unknown (carbon number 21); PlaSMA ID-1280	4197738	4172199	4269012	517712	338847	432209	4098910	3580220	4843642	2105978	3822334	3011304	1259024	449945	487983	465058	387168	657719	1110855	773169	911311			276688	383228	676371	434644				282504	219283	99498	589334	171924	99006	729590	1223550	1319941	790626	927304
m533	8.364	465.197	Unknown	1097663	190079	2044		1208		461		14561		995	1275						4150	779278	791006	876127	109541		116974	283912	573385	695540					93780	94974	197900	4003	17224	289417	64415	97636	359061	484825
m534	7.58	466.202	Unknown	377288	501545	582217	1068436	999246	776566	506696	364670	538431	964312	811639	1055542	1297853	1141701	1026062	882903	882306	996837				87693													56745		203059	202250	25928	357505	220622
m535	6.513	467.121	w/o MS2:N-Fructosyl gamma-glutamyl-S-(1-propenyl)cysteine sulfoxide; PlaSMA ID-1285	913091	1743447	1179827	3379330	2577714	2814608	4024172	3366651	3585436	3609334	3534822	3091853	3674207	3223114	3441881	3087362	2470367	877295	84187	16609		22620	27307	10622		256636	3765				22693	369496	277644	11320	63040		553940	1250192	1663597	559697	1574510
m536	6.443	467.121	Unknown	548680	569202	1304020	2910038	2709400	2800193	1229117	2870428	1152317	3619215	3534822	3143422	2765850	3223114	3441881	2998073	2119815	877295	100793	6463		80423	97096	23903		215444	7710				10085	102686	108584	22974	113181	239	553940	1161111	1702988	1373439	477967
m537	7.491	467.169	w/o MS2:Unknown (carbon number 19); PlaSMA ID-1288	1515836	1493811	1297723			1607	297579	490669	558075	221740	347549	380291							1541946	1917604	1391988	76200	63536	25708	1245411	1344194	1594110				29461	48842	1189	49519	469492		313789	345837	355119	421066	1327086
m538	7.262	467.177	Unknown (carbon number 19); PlaSMA ID-1288	1401910	275147	223572				43962	66164	77729	30412	55011	58672							7046853	7960721	7062390	321776	252814	201938	1655928	1767922	1949072					86315		268409	478086		1210906	1306629	1372325	1447532	1246544
m539	4.844	468.133	Unknown	1619608	2827974	2755090	3657579	4080391	4402527	1294220	2308076	1452376	4517118	3866834	3936788	4063622	4213634	4241593	4539910	5687934	3766596	4587	13900	1642	1292				9548					478	298	8394			2006	870510	1240887	1047923	730648	968972
m540	3	469.097	w/o MS2:G(8-O-4)FA sulfate; PlaSMA ID-1290	73460184	87221808	96527072	158868	698990	116544	4197516	4334404	4707719	5098572	1826607	2378276	169334	163923	396384	298988	611673	272799	3317887	3893472	5494881		49073	7169	1508860	2184687	2427582				1511	5991	36655			1252	7806750	8255732	8966077	9648330	9172659
m541	2.916	469.099	w/o MS2:G(8-O-4)FA sulfate; PlaSMA ID-1290	69612592	80187784	87893176	88600	641697	108958	3899465	3958081	4119500	5098572	1652018	2378276	88771	204354	382809	224449	478767	133179	5236853	4208350	5051611		213197	6294	1553190	2206949	2528692				4425	12288	33559	712	1702	5784	7469037	7731500	8721554	9074670	8716558
m542	12.422	469.331	Unknown	242020	87540	98513		84512	237533	2843495	1739502	2745396				206330	286168	360404	374798	224253	200411	831726	356166	270303				403211	363568	528889							174661	154420	122907	424538	466600	557448	531296	467542
m543	15.782	469.332	Unknown	3338872	5020866	4107208					98655		1696196	1943932	1175787							1838348	5174940	7132439																223807	319740	117503		225756
m544	5.723	470.121	Unknown	3854387	4523250	5381788				341													340		33972	939											28730			310522	95779	388491	324704	386729
m545	6.517	471.115	Unknown	2421760	2252750	2733582				1021187	1139545	1266049	219279	99799		91194		194766	13922		25071	2884526	2988556	1801049	1644855	2290586	1943067	2683349	3466613	3831696				1987360	1802784	2025610	2071777	1757775	2035812	1409980	1017770	1312465	1933802	2082277
m546	11.998	471.26	Unknown	612263		74523																520669	808843	930051	90718			665245	871884	976871								189602	117162	279952	436449	693029	656438	239791
m547	15.268	471.347	Corosolic acid	804709	1119327	803125							503455	519847	626607							148625	447131	849502
m548	15.982	471.348	Corosolic acid	122352	605084	631775						33392	21874	73191	60367							1481582	4177478	6356398																	36989
m549	3.772	473.055	Unknown	1978870	3141395	3565132
m550	6.365	473.164	w/o MS2:Unknown (carbon number 24); PlaSMA ID-1301	76164	9356													34277				388403	1709490	1615157	1685927	1362560	591674	375551	236813	1412911				686979	737861	2160122	1707710	1214436	1848992	139796	171529	126474	335556	149376
m551	4.837	473.191	Unknown	429180	975914	1002937	1060144	1156512	1768130	1045041	760768	669477	1422512	1437180	1141517	1500917	1425911	1538638	1257374	1559668	1128724																							136067
m552	11.214	473.274	Unknown	2478804	2411521	2820338				90096	20679	118752	279251	203661	205093							5943572	5372428	4539414		2491														599811	670166	293526	704803	387642
m553	17.36	473.274	Unknown	1854046		559342	1996372	3470840	2434401	3367218	618470	2807136	921440	391181	1346555	5255836	479383	4408218	2279147	86496	360680		313576	253222		2348			11447	188824		2053		100095			15684		1965			146885	55864	89514
m554	3.731	474.152	Unknown	595460	882644	719320							102657								35504		27237	36536			19935	81560	24771	18934									31554			102578
m555	2.43	474.153	Unknown	1980284	2619633	2273725		24786	111973	60219					76275		75395	38864	40119		20607				3934	14409	95268		87165	59467				30061	50169	11608	235030	12888	17714		89220	493988	77603	150636
m556	6.74	475.09	w/o MS2:Unknown (carbon number 22); PlaSMA ID-1304	1519811	2280856	2434825	1187654	120544	874442	451935	349832	149088	333265	487565	136924	386656	279952	850950	542145	724498	863087								9418	8366					3168				105284	457130	450040	22201	261890	25481
m557	5.862	475.146	w/o MS2:Unknown (carbon number 20); PlaSMA ID-1310	25027								75887										3352032	3416897	3522047	1954221	2590868	1659357	1872926	2285696	3574599				1693289	2253786	2307312	3039453	683508	2090467	133394	282150	606854	1372530	593754
m558	8.041	475.161	w/o MS2:Unknown (carbon number 20); PlaSMA ID-1310	1705870	2340203	3000146					96514		267289	272985	101868							230221	330829	112835			1110			1169			2887								123589	121176	161705
m559	11.676	475.29	Unknown	908941	287381	529718									91465							14122561	13867972	13106569	307908	415714	447243	1547268	1507816	1588592				247459	428075	675425	1280513	1330335	1517274	1338890	1543246	2058532	2036913	1659299
m560	11.984	476.301	w/o MS2:LPE 18:2; PlaSMA ID-1317	1192040	2580214	1454746																749914	843239	815066			7460	17015	32765	29015							35215	2989	4214	48693	109279	149047	23213	110594
m561	6.285	477.126	w/o MS2:isorhamnetin-3-O-glucoside	2265532	8734	45468		44492	7570	8395	83828	32915	32342	17080	386	11126	19760	12569	5722	17686	68028	8925150	14872082	10891679	12922100	17625918	17652648	10526721	11692900	15896977				18555868	16929210	15245149	18061330	12234232	15360419	4756937	5936346	6118820	4901950	4731076
m562	10.356	477.159	w/o MS2:Benzyl alcohol + Hex-Hex; PlaSMA ID-1329	14216409	16776120	17094196	20381698	22459082	22425146	24176384	26097428	23061940	17364040	20655454	21217606	24855942	21186290	24303600	21291666	20717824	22320756	871383	1045463	1123863	1723706	1796546	1751348	2068633	250677	645675				1821918	1606488	1294898	2184878	1565190	2152634	9352456	8912153	10355810	9309543	7942671
m563	8.273	477.161	w/o MS2:Unknown (carbon number 22); PlaSMA ID-1324	3758720	4621294	4753938	4318757	5408498	4756516	6093098	5133791	6570230	5271538	4015158	5360202	5374194	4748172	6437930	5547604	4518416	5353821	706539	590895	610083	610137	550090	428181	631194	821334	708755				274573	494387	821906	867477	643248	396436	1797424	3043169	2426335	2481466	1981334
m564	8.529	477.178	w/o MS2:Benzyl alcohol + Hex-Hex; PlaSMA ID-1329	5403910	5545820	6010250	331694	391292	314921	395658	274061	430345	1686853	1475374	1719110	311597	278925	459836	350299	247863	316988	1048017	1141518	1272538	20494	21467	23202	41604	196061	47310				3689	10082	36669	42192	32936	14892	587328	883740	1184990	1173727	808136
m565	10.122	477.241	Unknown	267654						1135757	1241817	942870				122718		106106			82091	568011	164038	250650	135939	125938			100233	159519	361							277718	161527	334650	449915	340835	369138	127718
m566	2.91	477.956	Unknown	1113737	1326963	1030196				209558	339811	109732										510242	1110379	1075355	106956	79837		946966	1275783	1279213								113577	175105	380706	547278	534731	394787	646361
m567	12.431	478.318	w/o MS2:LPE 18:1; PlaSMA ID-1334	1827808	4103705	2711396							24142	143843																										145035	166391			22732
m568	4.842	479.119	w/o MS2:Unknown (carbon number 22); PlaSMA ID-1338	2184065	88063								25426								9960	3900642	3338166	5277951	2001687	4785472	3108471	2798925	3198252	3151156				5863010	4273822	4502951	3958461	2369677	5482782	1884553	1985835	2691631	3073388	2202460
m569	7.781	479.249	Unknown	317211	99136		85555			797995	762710	711261				87372			124090	166956	105131	343648	222895	361364	184044	136682	244475	1600653	2253904	2000968				302372	359880	414110	1024114	922183	994607	321578	398877	462037	334581	274145
m570	2.895	479.951	Unknown	815665	823818	315339				107969			102002									422197	628132	542929	127597	236428		913993	664494	794903									338346	243067	392723	443662	134960	305634
m571	5.723	480.149	Unknown	1422514	3053742	1987208								1841		82232																			82788			24316		238384	128499	139000		101161
m572	10.7	480.223	Unknown	25085208	7903550	4315274	3098483	3024160	2947825	41498328	40390732	44657620	125590	83739	161040	5557962	4501686	4555361	1537311	2963256	2622920	3445445	3567757	2533076	5906226	10178045	8599757	38088452	42609108	48423000	105726		153028	6854988	5594502	6857228	15792931	12171009	13985691	18749348	19597266	15573397	17296806	16234919
m573	10.26	481.113	w/o MS2:Silychrystin; PlaSMA ID-1342	1855546	1898339	2873646					14425												327282		24418					19841											14758
m574	5.282	481.118	Silychrystin	5630282	12256	8393		13113		1967	15126	43283			1587				8231		3290	28130228	27279522	22515416	18679464	33621948	31182724	19464164	16136542	28087216	41294			21203080	33393266	27910862	35874444	14881371	18202512	8872573	10405686	10716932	12994480	11999983
m575	6.903	482.094	Unknown	579241	650917	660394				42656	188200	128678							1153	81489								9609	27440												93590
m576	2.643	482.131	Unknown	901080	392424	1155472	2066792	1846686	1953118	286254	395301	241295	1736564	1739459	1665902	2125907	1951603	2024981	1867032	1485970	1912962	361112	114708	136600	125472	120565	83747	200804	176666	64739				211241	146772	89181	1269122	618967	433663	728092	549869	472715	577389	39552
m577	8.044	482.216	Unknown	550196	448420	541138	1466128	1150014	1410168	732888	940743	924188	916365	1460906	1388360	1397195	847119	1588580	1506733	1379348	1151884		3270																	75893	368206	124227	166839	312334
m578	10.137	482.217	Unknown	5252002	6198605	6735702	10545437	11340842	12142966	5284027	3349501	5251030	11641026	13036634	11637828	12135964	10399237	12265185	10598364	8400017	10235990				1958					3489										2425420	2694252	2423662	2452390	2192308
m579	6.58	483.115	Unknown	5850008	5673552	7258084	350222	184343	267533	914392	123004	797909	85094	293093	444437	1525961	99405	115816	130575	69576	19039	1469013	1214819	1309423	467376	1222422	1265607	827378	819505	430440				1298308	1169844	1137032	1394155	887862	1195613	1548172	2014420	764156	1489884	2082830
m580	8.762	483.128	Unknown	6413201	6944982	7204236		27111		2007631	1463688	1766275	167908	147121	146572	306165	95427	142306				2164828	1933413	1686446	40218	130832	367671	2397123	2814483	3037523				66299	39536	50284	61897	36374	73704	852850	1241939	1138304	1363885	1218497
m581	13.895	483.311	Unknown	1023137	1964159	894886				219552	297062	370438	249305	96988	157418							162882	193114	160131				181610	291538	133018									147353			136369	123135
m582	6.496	484.115	Unknown	1132894	1405619	1326598													28034			206880	80062	148409	21066	255680			7328	28293				36215		218908	100477		115584	76095	83195		12197	92037
m583	2.389	484.184	Unknown	1092878	2138941	1749878	198753	82806	160894	223227	202095	49905	153105	116586	154574	69790	71594	78859	103741	69551	63854	6947				11205								21465		14394		44095	69405		52618	31807	34641	69332
m584	10.116	484.211	Unknown	1096080	1559863	1819144	3704332	3526806	3994552	708411	984307	1074577	3513184	3421904	3684120	4038531	3006530	3433945	3274538	2783580	3316871				3888			666												399911	357486	344482	383842	408816
m585	6.819	485.109	Unknown	1980874	2195914	2203362	53704	30179	70666	707117	214130	192304	467962	4297	162609	38305	47520	679208	9570	12478	46012	906433	1440971	1162009	397	145294	1442	487268	1064195	830444				4331	19926	5965	13887	251415	56286	528258	378833	499730	570105	522557
m586	6.218	485.133	w/o MS2:C24H22O11; PlaSMA ID-1347	580495	503778	1516638	1246388	1359475	1632480	1672155	461000	573482	315068	194356	1265502	1645660	1433338	1421649	982755	949832	376487	1967608	2525759	2448924	1199153	2142600	1874509	1791287	1972402	2176772				1795142	2048423	1722570	1853622	1362374	1834654	1612229	1942442	1939810	2108340	1694454
m587	6.92	485.22	Unknown	535925	552060	783412	1058796	769490	791491	811494	834150	850686	412922	722202	833206	796211	934262	1248053	1159826	1054700	1164725							2665												374245	77631	443596	153290	211153
m588	10.702	485.237	Unknown	11109623	5913102	2241492	1037098	955674	1244149	24620498	23030350	21916964	20701	11367	1012	1335233	2456667	1278210	556389	1518450	1465473	2249556	2168149	2679723	8679937	4712013	3719584	38291964	32018178	26101458			128435	3818675	2951462	4356350	7082124	16809562	10455831	18907774	13439138	10102876	6798404	7246909
m589	15.577	485.279	w/o MS2:Unknown (carbon number 24); PlaSMA ID-1352	3982236	4825641	2917490	908974	1197538	1525420	2896441	3568144	4203659	1199588	1511783	1305531	2279651	1090926	1785622	1048270	1053870	1507487	820005	948988	795688	133058	494403	474275	1122164	1400989	1426139	820892	705415	199214	376665	259457	620860	460365	131003	460600	430776	1263035	1418605	1126865	964861
m590	13.767	485.326	Unknown	4057602	5932624	6311006				815258	725698	389998	657128	631656	798778							491446	448012	707886				384375	251390	231173	28842									320734	204196	475399	599081	310557
m591	5.34	487.109	w/o MS2:Unknown (carbon number 24); PlaSMA ID-1353	3291699	3851004	3252570		10035		1548130	1563802	1225266	567966	59059	97487							1346328	1556764	1889855	244371	465561	181790	1893292	1840292	2304888				127608	13774		7661	409275	343630	829052	1216834	1014176	1112386	1406444
m592	2.875	487.109	w/o MS2:Unknown (carbon number 24); PlaSMA ID-1353	52021692	59961412	65184168	240225	170404	228217	21267402	26712636	18420856	8327970	3049381	5567312	476127	116825	457395	219831	208756	277228	21198028	27728000	24369620	3967799	5428779	3255471	25417494	29175956	32476468				2123260	779058	824775	1126295	4073156	5719573	14360797	18377056	18446780	20198698	20391582
m593	6.244	487.147	w/o MS2:Unknown (carbon number 24); PlaSMA ID-1353	211219	9270	12917			37646	865		815		1140								3382618	3035914	2904224	3189404	4296704	4164333	2937069	4077214	2622259				4144980	4134313	1288694	3845825	4047491	3630824	1028774	1392084	375294	1039276	963190
m594	9.742	487.214	Cinobufagin; PlaSMA ID-1354	959464	122628	433357	1528900	2465962	2265135	10103798	8193560	11635819				2984514	2504225	3139502	2118789	1110935	1594494	295226	179125	198861	388057	620261	1008934	1619027	2410868	2120594				372821	727692	617707	2037717	777182	1643786	1346194	1936840	1660986	1810398	1753492
m595	7.783	487.307	Unknown	8465295	6680574	7872370	27502280	37991188	35296732	24431302	17344982	29004938	24975600	25529738	28868014	35315520	29644294	34130148	32102132	31166218	30408748	19058620	16468066	11961689	8835965	25763348	29758106	9952430	17199352	16139196	48707108	61674148	61656056	26532104	28070338	24851030	27963610	13057452	18776128	10216085	16633147	17566290	20508540	17788702
m596	7.293	489.102	w/o MS2:C23H22O12; PlaSMA ID-1359	3445632	3949147	4559402	758504	105703	855605	438583	1713152	1237360	1506954	1752323	1595941	902540	984979	438599	98796	162330	594709	90773	297831	291632		89242		8436	188000	47758							123569		220900	471316	708270	800795	470110	535658
m597	8.246	489.138	Unknown	2916652	3651282	3646878					2995	72137	1065248	1135021	1864785			3367												99246										168354	352057	251788	233317	2418
m598	7.783	489.3	Unknown	2033883	1813918	2170800	10266024	12818846	12000555	7705480	5624762	9496253	8976462	8501328	9494525	10588810	9894748	11979854	9875385	9811695	10852038	5644768	4603172	3234664	2733991	8521894	9956821	2741864	5208912	4500440	16841454	18275450	20568816	8982817	8795627	7503849	9315462	4093313	5403518	2825597	5322938	4901050	6547100	5612438
m599	7.626	490.321	Unknown	53251	89367	173414	644112	565393	769158	524204	469659	507273	318709	627722	505402	975220	661256	508769	438051	884677	405327	497670	272254	104396	100350	770715	405894	142536	459472	401904	1073345	1350894	1641657	805216	841284	762762	869244	339887	502024	173635	270078	403589	515917	272601
m600	9.345	491.214	Unknown	334926		82158				58777	39763	47473			535							7489609	6667454	6295999				62475	152640	378951			3653			52735				331019	626851	990266	957205	754928
m601	10.004	491.288	w/o MS2:Unknown (carbon number 28); PlaSMA ID-1370	15570035	3222889	2650342	2699731	2368038	2652848	36074316	32054728	29718286	512175	500708	589489	3141599	3292870	3194684	2999032	3060738	2603578	12692022	12041862	12291365	3315228	4326670	5200772	34514692	22264122	28617256		94559		1644420	2275821	2009100	6737728	5301694	5000808	11767408	13435567	13761701	13752009	12232880
m602	17.702	492.11	w/o MS2:(Methylsulfinyl)octyl glucosinolate; PlaSMA ID-1371	1897797	5177204	2056709	1627265	504277	988922	1777215	1032126	823946	1406251	486817	428516	996144	835702	1032534	1131549	546587	3427737		70213	24566			3098	13954		23465						84491		81052		471081	1158631	289167	1126779	146648
m603	5.359	492.165	Unknown	1463762	1984550	2116934	136893	9229	2897	357037	622853	436370	9273		4696	57086		1980		85740					14802	3030									363					172903	245675	146124
m604	2.872	492.165	Unknown	11725557	17442966	17619952	278040	52424	126081	7061246	8189206	5339444	2815884	1456578	2049478	292007	56089	436732	221683	73310	49704																			2634178	3385485	3376554	2669352	2565256
m605	2.533	492.165	Unknown	1631051	2326774	3171341	602171	521008	755308	1306702	1581652	950339	721131	395784	579573	759018	243119	1326088	733113	470400	394509		4490																	417954	538267	583171	508503	484749
m606	9.733	492.22	Unknown	387701	58546	182051	301835	506064	795251	3731518	3533780	3838812	13215	3847	8270	583196	1363775	649625	274747	260905	814854	236326	207990	159889	375220	136185	249793	1014030	920974	702804				56577	218000	789843	845127	1593927	751971	1025104	854601	732725	532938	435062
m607	10.218	492.246	Unknown	1451202	2816306	2006843	2604528	2680722	3384745	2350481	2556884	2104055	2684652	4059138	4199815	2577218	4238254	2321057	2801660	3775816	4707700	11213		23522	39256	823	1319	30623	29332	33983				390	3992	3275	5836	25110	5890	1849946	1244195	1278030	762417	801704
m608	6.243	493.101	Unknown	1000476	1902446	2099777	47616	118701	344545	876609	763266	174356	280954	96265	127631	406667	420095	635577	306171	78397	632679	4340	8071	1490	10752	8771	104470	71424	49636	21536				43522	30917	29251	8829	413	8060	1136	304380	349936	2389	349975
m609	5.409	493.156	w/o MS2:Unknown (carbon number 23); PlaSMA ID-1375	1404706	296256	250620	2956	5351	52534	440	56203		63708	3554		4143	3625	92498		41504		3618656	4581544	3105501	4232300	4531156	3019615	4114991	3910919	4283772	84919		59593	3977249	3986273	3715516	4614910	4531762	5178756	1820102	1391862	2038184	1846792	1934540
m610	5.667	493.156	w/o MS2:Unknown (carbon number 23); PlaSMA ID-1375	389161	20384	12790			2467	3959	7256		20479					15217				726157	1323751	768904	1306864	856258	5011633	1111420	818179	1082834	82264		7691	1425841	1590935	1256071	1426364	965172	1616072	372029	339402	557163	361098	310498
m611	10.15	493.239	w/o MS2:Pentose-Hexose + C10H17; PlaSMA ID-1376	9132	436303	283978	307365	329776	536053	2045641	421880	1663685	342736	360847	497758	604808	1072367	148637	507272	854222	695995	58476	2035	5166	145609		235138	83758	25503	12785				235365	589917	742508	815315	771648	1060047	1217630	537180	22888	14965	116538
m612	9.96	493.302	Unknown	569604	132067	57445				1125946	732429	970750				72588	111067	88909	52098	57483		24197148	24906700	25414966	30515	161293	103626	1527091	1741915	1534962			74182	3734	69639	241570	667037	569504	400747	3531090	4184660	3831718	4026037	3424497
m613	2.917	494.16	Unknown	4037614	5514409	5168692	23392		24065	2155517	2481314	1739041	539714	539375	517248				74786	9623	4318									26982				12803				83733		914129	1049785	1182523	820136	808377
m614	11.171	494.326	Unknown	942026	1617367	1498244																6818	12285	3762																36148	48103	102575	37606
m615	10.589	495.228	Unknown	22064184	9984037	10785483	8821026	9003509	8484173	64268360	54371684	56247040	1089062	651053	617083	13625743	10657804	14378717	10694482	12458410	9460538	22438154	23285286	18909372	8396494	12348736	12713808	31408532	38354104	38051248	190814	108318		5526406	3880548	4480688	11989049	8795068	11147437	18522534	25077536	25163762	29787368	26143362
m616	9.616	497.111	Unknown (carbon number 21); PlaSMA ID-1382	22884616	19970730	26050042							252369		192193							1077913	2751438	1776255	282357	884144	171579	214824	136968	56627			3902	155898	77194	566608	105387	14221	227587	936181	979795	1422132	1401985	1331992
m617	4.743	497.129	Unknown	8702577	478685	21924																17671198	19143710	17062190	15520702	19684492	18067400	13622744	18701916	18400758				17551418	19023624	19503400	23664594	13460417	22681392	7141254	9435985	11115034	11994677	9603466
m618	11.523	497.13	Unknown	2232478		401143	2022430	1768739	2878358			333704	1499999	1503023	2157486	1587876	1432038	2659139	651950	1326145	1685068	153781	3703215	5522320	169780	414909	111317	3442902	857439	2416985	134440	69836		105073	452928	753052	456389	2382188	1924125	34426	291057	4589	332190	102307
m619	7.785	497.334	Unknown	1358248	2010570	1519238	2278137	2579378	2979626	2530724	2396960	2528174	2339866	2769995	3351794	2492702	3384617	2201872	2213344	3603064	4138835	2710423	2242358	2681256	4053059	2134441	2633716	2716334	2547866	2141720	3729223	4523424	5742915	2895609	2318426	3585026	2030841	4662992	2817485	3662725	2866554	2833976	1992250	1825436
m620	10.714	498.211	Unknown	5233911	1271195	899662	1022020	571664	618777	7429680	7284064	8692407				1113116	705162	1164141	315601	273272	608915	646805	628178	370804	436365	1637180	1276699	4317544	4015039	4586532			71028	1102190	839445	701390	2758116	1075038	2262614	2514676	3297879	2502534	3626520	2520339
m621	8.531	499.098	w/o MS2:Unknown (carbon number 25); PlaSMA ID-1385	1368534	1370945	1615672				284261	303391	221092	2470519	2665024	2635410					13574		137424	322158	224096	17741	18139	8121	299290	319579	344078				1877		3285	5162	3314	5035	151571	278439	265151	323527	173186
m622	8.272	499.122	Unknown (carbon number 25); PlaSMA ID-1385	76516216	80709352	87660752	89905		61959	20740486	19729354	17912572	3307746	1317814	2296326		147967		17830		218945	12171956	19651060	18275828	4499426	4271144	2727102	23407538	25021950	26706260				986657	358539	515267	1872332	1679447	1624155	12431039	15584196	15758469	17137804	15362120
m623	4.751	499.126	w/o MS2:Unknown (carbon number 25); PlaSMA ID-1385	1292259						4666				4600			16921					4569840	5132568	3974366	4340268	5895090	5181576	3881463	4809920	5393308				6060169	5036710	5719076	6164362	3686340	5915003	1795868	2508017	2678284	2351264	2219865
m624	10.636	499.211	Unknown	3356779	925261	656052	326806	459753	474848	1851176	1467082	6958392				724630	450882	888126	264437	399063	1584769	508160	428010	224269	413545	1281893	1094719	3172564	2645146	6234472				721720	808093	548494	2252493	445335	1616824	2018639	397338	1845620	2244199	2136288
m625	10.908	499.308	Unknown	2726750	2514552	3218538				228708	135262	133887	2259	119838								378602	401552	577175				387161	386030	504514										117262	11448	212512	249693	80855
m626	10.587	500.243	Unknown	11511113	8074621	5131830	3395354	3106672	2843934	42986580	34064932	28290160	400890	230595	328045	4436553	6277218	3762600	4109397	6602036	5639771	15455688	13924288	17041914	10814073	5978362	6159552	35043924	31646810	26152202	34294			3364186	2764868	3562912	5803169	12678516	8333578	22987064	17828744	17873954	14717758	11832380
m627	18.818	500.772	Unknown	342586	273418	210426	148108	75256	519976	32340	44505	202983	965450		742721	18784	372031	213362	580832	35271	946362	962714	605097	1132252	183108	1612038	679895	536825	227619	953529	73979	169209	216058	329327	1217863	550948	344016	357780	73035	216604	616307	134242	392979	410825
m628	6.433	501.16	w/o MS2:Unknown (carbon number 22); PlaSMA ID-1388					20508		23367		17837										2074316	1705017	1992222	152224	1236308	171411	994357	96636	72224				105448	616072	32838	89090	797180	34679	614070	290306	697172	636800	655034
m629	11.578	501.32	w/o MS2:Unknown (carbon number 30); PlaSMA ID-1392	1091686	983028	1602023			33389						115356																											88961
m630	18.869	501.357	Unknown		152709										330577							3943328	6555347	7896766																256372	381212	302869	128906	247096
m631	2.811	502.125	Unknown	416678		5803																3630842	1218222	801334	5124702	6425026	1676441	1085516	1991305	5363332				6967087	6122172	7212182	7305331	3244032	1725882	1892803	2055522	449487	1995008	2582969
m632	2.931	502.126	Unknown	286078		1451																3629645	4349031	2228892	5141196	6427780	5837064	758862	980185	5465038				6160124	6331273	7345038	7294072	989061	6309436	1824244	732253	1468898	1992246	2582969
m633	9.617	502.217	Unknown	2406470	1211125	1141871	5565392	7880274	8663919	28871980	23457766	30703594		504839	343754	16001264	12372493	14930312	14828127	9333938	11101208	3527688	2303460	2000121	493992	1148245	2073694	1319383	1800238	1635466				392887	972782	678440	1216001	526746	1050549	4343332	5034186	5698029	5802075	5234171
m634	7.69	503.12	w/o MS2:Unknown (carbon number 24); PlaSMA ID-1396	4302243	2065199	4609018	17189	207192	270709	880229	406911	2405588	1665246	1149995	1598642	18073	243483	68207		45496	92875	742812	388269	869766	25722	51395		530296	199278	630590				94951	78872	24738		24114	54512	694298	1459642	1061742	781499	271118
m635	6.769	503.177	w/o MS2:Unknown (carbon number 25); PlaSMA ID-1397	690286	88012	168177				1069198	1184921	1524337							113139	82859	366946	1394353	1557863	1187178	865077	895624	749637	1726249	2062831	2164625				331500	1189379	1237352	1368445	977730	1029829	658049	661598	498088	340772	517530
m636	9.647	503.22	Unknown	1667791	242051	1149022	3594137	5507887	4867846	18011014	15616378	18211576	63461		86582	10310644	8645148	8737757	8810641	5079946	7100376	3408432	2081284	1805885	362628	354400	1911657	965955	1891383	1356376				200222	343279	332009	660770	145213	239425	3629318	4519005	3807920	4773492	4286748
m637	10.244	503.248	Unknown	381160	2341	61011	25490	44997	41018	594136	1806322	1953915				117441	72696	76936	83430	55527	53134	114568	74063	511622	19523	37627	34904	2304325	1533447	1568316				4759	17972	32063	49094	3212	139734	429654	47803	511313	282026	171830
m638	6.378	505.119	w/o MS2:Quercetin-3-O-glucosyl-6''-acetate; PlaSMA ID-1402	158988	71992	89527	13299	7519	27745	37123	43951	142278	72623	55570	26904	15949	3685	29216	11152	10044	4363	5764452	6380740	5019326	4936111	8836091	8608554	5437115	6483334	7268078				8700921	7776099	7557750	8145545	5306168	7098148	1092873	1923899	2509993	2958810	1853108
m639	5.731	505.157	Unknown	3489770										81434								11498240	10902628	9492104	11813763	14975279	14501410	10840193	12160750	12500093				14742341	13785837	13715644	14676365	12307402	13719003	6331280	6769278	7449010	7320904	6988593
m640	6.326	506.121	w/o MS2:C17H33NO10S3; PlaSMA ID-1407	474	78017	5767		29437			3223		90075		48212	3775			21391			1158701	988972	734444	242518	1878493	998394	706912	838153	675971				520007	1273893	1269473	1351576	355820	1086629	51900	107836	231911	83717	191703
m641	9.359	506.261	Unknown	3826324	1242481																	1693877	1703700	1910160	313297	540279	617016	2749371	4458210	4185414			26935	2385052	2176514	2240324	513277	336139	793885	1940944	2088520	2531218	2630778	2259056
m642	9.252	506.262	Unknown	3672362	1315440																	1721452	1739409	1910160	357036	564864	617016	2641350	3925842	4090353			95767	2428418	2176514	2265606	513278	371652	793885	1940944	2291640	2599344	2630778	2370603
m643	7.75	507.209	w/o MS2:C21H34O11; PlaSMA ID-1414	2423345	68634	46385				71849		65909	247897	198197	227604	62395						12254599	11929561	11980026	10614255	13019054	12802538	9520977	12164272	11333031				13576753	12443269	13874476	14110600	12979124	13648063	6445756	7000758	7380468	7471979	6333519
m644	9.618	507.232	w/o MS2:C21H34O11; PlaSMA ID-1414	6281929	876761	1118307	1837640	2796326	3352813	16146098	12656853	14855940	91148			5718247	8779787	4650958	5079925	4602526	7729294	22833578	23998022	22844122	15727135	20595560	11157487	20974588	24866276	23871126				21839558	22819952	22585820	843847	20555974	1646858	4753097	4112928	3921649	11129891	2369367
m645	8.715	507.282	Unknown	1885435	490853	237384	286526	337915	498959	4817377	4094452	3935540	84257	145215		291267	291121	246028	348093	402928	439957	2050894	1980006	1863886	365493	396274	311536	3951832	3931628	3687568				583091	372549	598827	1504403	1374815	1547073	1804447	1655577	1704862	1452669	1575516
m646	9.668	508.212	Unknown	1076742	662				22841	137070	117627	115090				13539	42747	1489881	19001	13270	33385	5641983	2409798	4462556	3167911	5121132	5221571	4092884	5024614	3965252		21055		4983378	5262298	4636217	6058112	4789624	5354418	2155217	2455533	2849808	2610142	2276206
m647	9.959	508.241	Unknown	301313	408907	361476	959285	254217	1284976	2427285	1518720	1791132			84457	2228327	1144698	633687	1927364	676421	972274	1702836	851645	1222359	1209028	721429	892411	245458	1137136	838914				176696	446181	435502	488362	467465	591739	2810726	2039355	1955102	1247037	1023648
m648	5.896	509.15	w/o MS2:Unknown (carbon number 23); PlaSMA ID-1419	1038528		1076				9495								1078		1146		6943355	6981300	3914957	6575174	8682287	8177101	6436203	3508127	6989496			2379	9433774	7013204	9013915	9029562	6735858	4782572	3045125	3434526	3699132	3838738	3408274
m649	8.026	509.223	w/o MS2:C21H36O11; PlaSMA ID-1422	403278	147792	131889				209709	85458	246158			98139							1288447	1245967	1346977	70702	179770	79548	215620	1420278	307882				84817	567393	68764	291586	265663	250720	505727	381080	563919	485228	314918
m650	12.888	509.238	w/o MS2:C21H36O11; PlaSMA ID-1422	5883410	8848527	9288699							702977	325348	357585																									270588	38256	122301	395052	160829
m651	2.43	510.129	Unknown	1913085	1844180	2587851																			8707			15695													192273	112609
m652	3.973	511.165	w/o MS2:Pumiloside; PlaSMA ID-1423	790272	181580																2002	22429802	24630768	12556259	11441902	11134150	12319886	4093882	3923642	24290268				24911000	6913173	3639093	26526658	20680176	25195176	4331072	4028498	3803767	1482896	4601642
m653	5.708	511.165	Pumiloside; PlaSMA ID-1423	13841534	915549					10500												45816908	44937352	42640308	44547840	74273808	49254424	43210636	49585620	46151348	52966			51689092	47523848	46354564	52733804	49727712	50513628	17453300	19460092	19276646	20603538	17065740
m654	5.809	512.17	Unknown	843168																		10206717	9355704	10536254	10778448	12358807	4027954	9622096	10838847	10170955				11820882	10961803	13319165	13970634	10662712	15482227	3669965	4598390	4548820	4481407	4268702
m655	11.984	512.279	Unknown	2231132	2539211	3218513																		19995				22568						53523						66383	28419
m656	6.209	513.103	Unknown	2718022	2310396	2746084				428565	602591	282736	1124497	698311	1208594				104917			2359786	1971217	2080446	128089		86896	3131497	3404135	2495132				84086	95410		497962	777969	474426	639149	570783	603782	816822	687095
m657	7.44	513.104	Unknown	3811414	4523210	4148710	22599			814312	742454	533349	611483	138013	228241	3685	10868	38395	90605	179395	10254	601497	3315868	3012483	334	151926	24548	5110246	5121402	5151933		1850		83603				281058		2296381	1312129	1734550	1401317	613651
m658	6.521	513.183	Unknown	1980714	266890	34595	484159	548255	45056	193500	346591	158420	70642	227341	399751	127688	366463	413340	282180	361840	458720	11441217	11297003	10286078	10664868	12889676	12640829	10378025	11265589	11571552				13505363	13819414	13854490	14037260	12422989	13340801	3505871	3816496	3884314	4202416	3659079
m659	10.592	513.216	w/o MS2:Unknown (carbon number 25); PlaSMA ID-1426	3982830	1493308	1708803	2366084	2478292	1655155	9870579	7548303	9411119	150036	219446	165959	2807686	1882719	3483164	2998304	2451786	1923360	3749601	3503184	2277018	603706	2583022	2403330	3915074	5222064	5339042				591827	569063	586179	2173031	573153	1331316	2380266	4135318	3935511	5881474	4566944
m660	2.905	513.93	Unknown	1136634	1232146	713841				87850	506862	123665										87763	719892	1004489	103812	181351		798235	867999	535327							63673	120758	77691	376151	458171	551666	446553	256344
m661	7.864	514.109	Unknown	9018912	3000222	9767545				1100113	1419468	804790	47825		111220					9638		22001	481038	242578				593888	659064	886709								13259	22506	363469	1330349	465558	577310	1166372
m662	7.691	514.109	Unknown	9270730	8834116	9761162				968247	1387760	240130	123881		124662							180880	1431778	709721				1569500	2055104	2156912							11287	103679	91627	587982	1521773	1379381	1482090	1213432
m663	12.431	514.294	Unknown	2964698	4245902	4412476							120074	77602	200441							2358																			251608			153889
m664	7.786	515.117	Cynarin	449124224	439928288	456303424	127215	416291	297286	87786584	101589016	61460388	22118606	3726484	13987108	575575	468182	118758	87358	320447	41233	42020012	104898904	85294440	12383039	16143009	4547698	121297112	124952480	135353904				4774950	272815	696763	398179	13854071	13464531	69920304	100621360	95693520	104780624	95855848
m665	6.562	515.178	w/o MS2:Unknown (carbon number 26); PlaSMA ID-1438	141965																		2715557	2139522	2000567	2121521	2565283	2482658	1996216	2960743	2094248				2611526	3109547	2852145	3105951	2578753	2923927	1098044	845796	1029496	742278	1088714
m666	2.937	515.927	Unknown	827705	812397	832856					351417	78233	85749									412232	840770	696756		210773		863234	695316	597396				71429				134113		247290	320276	311595	234500	269478
m667	4.804	516.195	Unknown	1900319	120199							8560					388											3723												2847563	3708274	3473762	2636321	2087174
m668	6.251	517.153	Unknown	338562	3127	3140		424				4552					1967		1676		415	1596527	1490612	1532231	4274140	5517439	4380883	2117940	4982984	5316556				5406658	4674008	5023908	5333438	5576726	5498134	772906	1040017	935394	1092040	941870
m669	5.694	517.154	Unknown	1251398		41451				63807												8669665	10050274	9679484	1012657	1311729	1077788	1325467	1295068	5607623				1154889	567690	1096184	674861	357859	302085	2610011	1097469	3061478	3294881	2968083
m670	6.337	517.155	Unknown	275311	1633	1992						3399										1754306	1609455	1625046	4294156	5517439	5512797	2221560	5011112	5675044				5458060	4767035	5155644	5633886	5724469	5778662	735278	942311	854600	1044659	896712
m671	3.773	517.159	Unknown	2551314																		20698776	28101154	26186524	1312495	1639802	890626	3354612	3582541	3997741				1144711	291038	620330	1120022	2538296	2433052	5121381	4868557	4352102	4713986	4765328
m672	10.597	518.231	Unknown	704050	324523	216924	168412	141816	314334	1725693	1852101	1762101				299089	297185	462731	315858	277064	151062	651838	778525	641973	251461	375283	312284	892798	1641668	1403820				135666	152951	211643	338145	350029	462366	733626	814047	931028	872849	770852
m673	6.949	519.112	Unknown	379975	109117	297776	310450	73301	250824	105059	463174	759692	86251	99920	199906	295868	194486	184978	57779	25920	38018	2713	59197				85512		25692	87803						1936				20198	77551	67305	106760
m674	2.862	519.112	w/o MS2:Unknown (carbon number 24); PlaSMA ID-1445	4643882	5270150	6091143	4142		25581	2204275	1890930	1929588	890296	160100	347948	19619	2007		8371			135724	528846	746210	43463	144914	51941	31291	448800	32988				48467	156409	103044	99643	38559	83405	1012114	1284154	1146900	1437326	1195576
m675	5.455	520.135	Unknown	729550																		3618914	3243124	1811361	693428	4466936	5143088	4764216	4656547	4464278				6248232	5147116	5827381	7579452	4604760	6224736	1559396	1017923	533907	1288530	1286658
m676	9.629	520.206	Unknown	476185	162978	314955	1401834	1788750	1928623	5302866	4446454	6906170			48238	3879219	2055464	3506503	3337267	2103127	2208425	626604	275277	307300	120170	164473	326616	137310	263944	312584				126937	160508	179647	366179		143521	772245	865468	1039242	1227070	943783
m677	10.593	520.24	Unknown	454523	318245	247127	100875	239692	118414	3265960	1954662	2513467					178145	112892	164949	211217	203642	592569	629848	715336	247504	271341	143167	622821	867334	1108091				346970	285603	272392	794045	629272	822418	857661	874044	689469	625292	565995
m678	7.553	523.116	w/o MS2:Unknown (carbon number 24); PlaSMA ID-1453	972426	834434	1078902		3584				14200											18840	58788			74352	193030	101032	145773												17219		13264
m679	5.817	523.171	w/o MS2:Unknown (carbon number 24); PlaSMA ID-1453	72915													21615					1467262	1405545	1379108	1311396	1506276	1527174	704149	1614064	501033				1305918	1637065	1914924	2551636	1311718	665071	170111	700083	301594	516258	541054
m680	10.342	525.219	Unknown	15165918	1054278	35377	8884			3111	3273	7181										41800136	45447216	42496940	45302944	52162684	55834136	51382912	56249884	52273652	117845		80379	54914244	54373100	53373836	59310936	53543596	61514544	21728938	22085978	22999638	22547902	20208328
m681	8.244	525.222	Unknown	685795																		4838353	4539730	4258156	3235730	4000655	3593587	4394809	4709285	4919869				3991432	4033933	4475228	3715962	3606026	4983074	1449579	2011910	1802885	2514516	1930229
m682	11.457	525.236	Unknown	5392349	6868702	8100196							865877	600831	311035							2920	2168	3283	3926	5202	8592	8104	3448	4372				4008	2952	4992	8095	6389	14941	80092	616465	773715	207251	758731
m683	8.173	526.221	Unknown	66535						7310												971124	710280	879507	436972	900638	631304	693065	827861	818677				864492	963078	1042577	896782	737207	956448	305357	437254	210302	270840	273035
m684	5.999	527.11	Unknown	2991730	2849642	1294007				256179	62727	429547	907287	384511	884084							10310	223489	127373		8112		78462	444805	127162				34889		19090		120561	92761	89399	116729	61452	138442	35581
m685	10.329	527.224	Unknown	451119		1927		10048		8519		9556						9978				2655278	2364422	1891092	2086946	2358649	2679770	2408256	1781217	2659437				2143382	2831720	2654251	3245173	3152927	2873345	963617	1167331	1345837	1126540	812922
m686	10.014	527.264	w/o MS2:Unknown (carbon number 27); PlaSMA ID-1458	782548	106868	108727		88779	78797	1271491	1131254	1537612				143176	111217		117394		90676	156743	130083	591647		105925	132295	1036989	1781217	2226413				82035	68771		549057	131883	186757	356689	499892	444635	426491	443923
m687	7.555	529.135	Unknown	2454064	3427276	2345114				330747	202775	382682	30287					8273			67379		6777	1946		537	240	2877	1122	4410				2702		2927	5045		7691	361584	202986	314204	97921	62746
m688	8.518	529.135	Unknown	19543856	22794764	24526094				4749016	4220048	4336080	2350538	712503	1846356				26771			1857145	3314212	2894797	416817	321999	3357	3959902	4650204	4615093								480423	566140	4607761	5385196	3468274	3438353	3071882
m689	2.398	529.176	w/o MS2:Unknown (carbon number 26); PlaSMA ID-1459	63894052	8266183																	176215488	173091200	173798208	183702496	131417640	197554144	125290064	198592544	171811920	1978846	1640134	1519755	209229824	189836560	139959168	206531424	200715280	139010944	82733768	87434040	86449216	84305720	82593944
m690	5.837	530.107	Unknown		1584											4877						278320	598638	115767	265322	669498	2648238	207870	991761	601663				1897318	1749230	844937	2240588	852030	1229286	2884		511163	408845
m691	11.212	530.289	Unknown	2341638	2872918	3463582							65829	259410	108757																									72205	189266	115986	171277	199093
m692	6.938	531.114	Unknown	14439913	13000083	14585469	410494	208462	71585	6526617	5000220	7035648	5777868	2970150	3760953	390359	222737	452028	337553	100325	146567	5411258	5314435	4511254	915381	1120806	848479	12336968	12276236	14920254				1266872	821516	1686691	2509180	2737836	3716318	3504382	3437044	4750016	3765344	3844933
m693	2.454	532.187	Unknown	12077	4896	58564	38210	21483	21816				34262	40590	11023	27889	43606	57365	12012	16412	25963	262653	771176	849220	276124	1184852	858628	1183826	1394145	1663830				279255	969731	537671	988489	1358356	603179			235496	276821	83557
m694	6.615	533.13	w/o MS2:Unknown (carbon number 25); PlaSMA ID-1467	11073345	7502110	12604292	3362	114402		1155735	834295	1633639	692509	79893	83329		7643		17886		91007	2465070	1392618	2442908		137757	1932	2985353	2660200	3009151				1403	19496	749	31943	8255	30997	1077133	1490553	1549341	2317130	1261216
m695	6.725	533.13	w/o MS2:Unknown (carbon number 25); PlaSMA ID-1467	7413380	7413732	7785638	13458	114402		1233394	444340	1633639	692509	79893	136997		21413	2694	63603		91007	888592	2446302	2277535	493	123792	1932	2678474	860967	2032140				1403	19496	749	14614	10211	22394	1142731	1526723	1762056	1312799	1261216
m696	6.649	533.185	w/o MS2:Phillyrin	11632										8843								592945	455723	1447189	1237333	698622	1694848	1506153	2050761	1924307				829628	589895	1797060	1449004	1566342	1489126	434580	519503	750751	801909	278030
m697	4.828	534.228	Unknown		244919	410669	178500	279192	319109	825122	452476	549401	362601	375967	366260	305568	266601	462582	316411	134542	250931						36911
m698	8.275	535.099	w/o MS2:Unknown (carbon number 24); PlaSMA ID-1477	10121566	7872698	10474867		340		2578664	1976542	2173134	436167	129885	175149				9421			1070390	1713224	1980667	131333	274930	122844	2368252	2153468	2410458									99831	1054482	1641483	2001740	2287488	1832058
m699	2.862	535.167	w/o MS2:Unknown (carbon number 26); PlaSMA ID-1478	1807403	557549	316536					88674											3563508	3644427	3584518	647772	1305819	472272	4187080	4353224	4999628				383854	319149	430843	418202	2148242	1551679	1047628	2927542	1521574	2848223	1380912
m700	6.102	535.168	w/o MS2:Unknown (carbon number 26); PlaSMA ID-1478	172995																		1199030	1140762	518618	1739160	1886366	2436670	1947170	2449458	1658088				4935102	2652861	3992748	2564570	2157621	1574838	1364074	803130	486207	475594	373667
m701	11.284	535.235	Unknown	32196						10104	10246	13156			533							636556	428324	446516	461211	575923	1287004	819227	1022759	540312				1028827	1278564	826712	1435400	706669	1474289	55388	178595	235280	230010	96219
m702	10.472	535.247	Unknown	1154205	1683846	1748312	571330	804465	300218	6650394	5845686	6812760	219754	23969	296916	876384	1260650	966962	1200463	1859634	1086063	7710762	7491018	7452963	710416	228601	524014	1327201	1460736	1263890				128847	132422	351810	695545	549674	654460	3054385	3414100	2961671	2623361	2543360
m703	8.281	537.1	w/o MS2:C30H18O10; PlaSMA ID-1480	5125317	4950572	5502544				1472272	1104426	923380	194231		74387		2286					417003	843130	939201		112469		720150	878071	1095806										243712	426531	914235	1093555	1089175
m704	6.416	537.138	w/o MS2:Unknown (carbon number 24); PlaSMA ID-1481	3685	12053	53540		51602	18276	12398	400163	106798	64327	498600	2878	69683	17475	8850	78134	57294		725142	765566	831133			318		7712	12359							67937	4492		90398	109211	7916	140379	152841
m705	10.693	538.23	Unknown	274550				78406	81019	1275984	953520	1037850							93128	184869		226649	109114	77285					254899	607662				113729	66810		420524	83025	418219	62969	400927	292650	318762	400301
m706	2.947	541.122	Unknown	1041333	490680	1071240				607420	532590	511964	159595	8023								87786	67866	211786	282745	266411	173360	240813	269406	154478				316057	224717	89278	218950	190565	217212	32519	153262	23109	496719	122574
m707	9.022	542.186	Unknown																			835943	617276	667755	830100	938533	868423	968422	1017391	896294				1085832	1330530	808359	1376316	674456	779073	324654	31071	376954	247528	254976
m708	9.604	542.237	Unknown	91620	19243		318784	307995	557924	1275915	1253695	1424242				694974	588526	603176	994082	828101	1052873	450705	321230	202620			150591											90205		424021	207094	343222	363777	279242
m709	6.288	543.136	Unknown							3285												849131	993177	661793	255621	472610	299361	655747	774505	491051				531301	106757	428364	134620	344864	166418	200036	205957	157572	143178
m710	10.7	543.228	Unknown	85289	27587	4820				641713	168417	54281	424									546118	338327	582935	565890	683954	482154	372522	719847	537395				420913	696085	678095	188385	510209	717821	120611	93416		30453
m711	7.443	544.237	Unknown	132914	439102	247291	736065	805438	823978	61447	77989	66525	845186	876873	747555	648750	1224264	839625	797014	739535	876796															4160				96819	150421	95543		67488
m712	7.705	545.13	w/o MS2:Unknown (carbon number 26); PlaSMA ID-1493	194718	1629802	2093981		13135	75711	417675	362261	945838	389061	283563	697550						102882	476536	197571	81451				560914	481274	504483							211010	239864	169287	140367	197567	265923	431006	288105
m713	2.902	546.181	Unknown	1178384	1274624	1334871		7326	60563	959044	645590	681943	248776	75569	182763	1839		15367																						410415	275913	593861	342656	309412
m714	6.707	547.11	Unknown	4916982	4306644	6454736	68003	225968	25068	4304474	4032547	5036398	1230464	813926	1151204	356381	131761	139508	95058	129869	402301	1010252	822279	781654	98837	345182	117581	795548	1170301	1285061				69714		151959			64519	1066724	1197910	1196573	1185218	1353998
m715	9.335	547.126	Unknown	13751631	14367690	17162268	704704	487501	578366	1277813	3996768	4067611	4393076	3228053	3212840	112705	56228	162626	1177988	765550	927652	3577325	4138460	4200958	147057	283257	126532	2684252	2677318	2365982				112903	156690	113136	1157380	1136307	1253560	2984710	3060899	3240527	3483866	3527938
m716	6.238	548.178	Unknown	1373548	1461078	1423245	53274			852181	567281	829251	285243	613858	380335			109683			21946																21640		2664	225395	161318	208278	150076	234108
m717	8.163	549.081	w/o MS2:Flavonol base + 4O, O-MalonylHex; PlaSMA ID-1503	5328696	5402194	6429300				3012980	2540474	1717666	306134	77779	233721																									415365	1009542	515943	771796	605266
m718	6.577	549.125	w/o MS2:Unknown (carbon number 25); PlaSMA ID-1504	2046934	1852049	2731841	2109		19411	849451	300234	1012082	41873	88518	14525	40921	22536	27128	34416	82610		8651	52840	5825	30560	47056	76171	11847	69233	30033				36466	53925	38951	59867	19871	21132	139559	7997	135965	15326	2912
m719	5.809	549.148	w/o MS2:Unknown (carbon number 25); PlaSMA ID-1504	119399	20248	30598				21941		14577										2007877	1346552	2950191	4403714	6392214	6441425	2139197	4365120	3196966				6295294	5709484	6396326	6730153	4472084	5574119	154669	1037998	1495492	1841481	1218294
m720	7.762	551.095	w/o MS2:Biflavonoid-flavone base + 3O and flavone base + 2O + 1MeO; PlaSMA ID-1507	33824872	28378788	32602606				7226460	8081064	5362209	1558584	153321	1293440							3423840	8213172	6395110	843338	1550875	463510	8605806	9459204	10980208				461366	74985			1123233	1036890	4707356	8040406	7256908	8853316	8528093
m721	7.775	553.092	w/o MS2:Biflavonoid-flavone base + 3O and flavanone base + 2O + 1MeO; PlaSMA ID-1517	11756118	10475155	12549034			74850	2701055	3079452	2045261	636380		285195							1227997	2609754	2343067	296771	410036	124024	2702474	3459119	3585526				102439				261833	419743	1517524	2409821	2412612	2841636	2959226
m722	3.825	553.131	w/o MS2:Biflavonoid-flavone base + 3O and flavanone base + 2O + 1MeO; PlaSMA ID-1517	545621																		5976568	9248696	6978138		47249		634138	756998	820502				130916				188025	94516	708063	1123775	1521958	1562003	1036090
m723	3.259	553.176	Unknown	1269091																		605389	842409	906032	9137225	8352387	999521	917396	7088758	3494618				2497364	6017133	7116582	3813889	4414864	1280717	3065246	3144734	4191380	1624229	5333721
m724	5.398	553.177	Unknown	1551561												75838						5836466	7387268	6416324	2713833	8889978	7501552	6832670	7746016	4009295				3001213	9046143	4991186	7731224	7884629	5370679	2937235	3391998	2925524	3144090	3377380
m725	5.553	553.178	Unknown	1731934												91842						6680140	8280451	6964488	318351	2739926	8478806	8404794	8572766	5680916				2933283	9374488	8665501	6376532	8236612	7968714	3203804	3391998	3129104	3185101	3701390
m726	3.784	555.134	Unknown	157135	1861	19905																2029831	2871698	2053592		103917	55981	51949	20143	135351				69249							285452	417504	304946	223265
m727	12.531	557.294	w/o MS2:Unknown (carbon number 24); PlaSMA ID-1525	10866																		4149888	4456985	4146227																96633	211999	359011	244054	69637
m728	6.982	559.106	Unknown	816976	557084	637949		221097	62013	470668	739926	939067	55739	231126	62501	83125			115097	1910		59698							73012			11085												69198
m729	4.877	559.151	w/o MS2:Unknown (carbon number 24); PlaSMA ID-1527	3390849														12494				5214804	5237504	14331411	6328770	4826035	4331564	3597523	4529234	4736932				4973176	6190302	6057522	6259144	4987616	6476036	3288574	2755685	2790344	2737648	6166252
m730	10.267	560.241	Unknown	1262255	164848	313966	748320	1103673	1124132	4985232	3728942	4888884			71236	1770545	1378672	1824868	1116548	1249439	1311558	253397	166805		394059	703711	796612	194004	379432	326695				317497	540392	624275	1325887	134186	199623	656363	1087003	1246560	833203	907165
m731	10.072	560.243	Unknown	1232348	170168	290931	296791	380306	492128	4242172	3291152	3910210			73534	879414	682522	789036	500737	464369	404733	231676	152630	360	415217	715976	881847	1000046	1540882	1218936				273004	487866	572155	1233486	359710	515331	736945	1050297	1125744	688223	811290
m732	3.057	561.107	Unknown	1494446	75826	11779						1128										15477226	15322999	14465840	18496472	21874588	20921246	17120268	19402832	5167639				21678874	21339610	20135438	23092610	19586102	21236898	9608560	1194414	11550075	10114005	10451874
m733	10.343	561.253	Unknown (carbon number 26); PlaSMA ID-1539	61734612	18564528	11713030	8128507	8207822	7294548	93175888	74875608	83848344	840030	702600	1064365	12841257	12267766	14024275	6108740	7923098	6488854	11575047	9904211	11044188	23001500	28001292	28623796	89453232	102570680	104609424	623732	506474	586659	13159593	11619571	14330075	28474960	30328014	27967718	35447608	41777880	43503932	42215004	40305488
m734	10.239	562.251	Unknown	37992796	11107699	5964401	5319590	5324086	5573690	51459488	43167928	47920592	1983875	1914355	1836645	8433938	8298352	8518277	3929760	5581908	4865282	5414384	5119699	5539820	10726227	12213817	13441370	53580396	60427768	59193256	122444	310089	314228	6708829	6062110	6590400	14993757	14675561	14635137	18821962	24773236	23503444	23831512	23555322
m735	8.044	562.251	Unknown	376432	471532	731071	1151399	1337594	1042846	738457	735424	754727	898771	1190672	1180818	1194509	1244875	1329861	918201	1037566	1075621																			179914	91351	8381	191542	247624
m736	3.272	563.153	NP-000004(11)	86690																		1010914	431911	216486	476022	236833	1485763	811023	1085476	1292747				725796	501291	210892	659809	920951	686725	168846	20952	204579	55332	141902
m737	10.342	564.767	Unknown	509879	505886		75450	91409	132583	1294803	1229079	1328584			1510	207026		91155			89892		271036	107902	915072	136074	220832	4130742	2733506	1664206				147226	257654	81851	233010	997707	279833	950513	646805	648267	378810	547223
m738	8.427	565.114	w/o MS2:C24H22O16; PlaSMA ID-1557	2451450	2826865	4124466		14424		845526	623464	669088	486376	104128	269098							232608	496691	314917				162918	576590	622283										304934	551870	390728	470771	523959
m739	10.149	565.267	Unknown	1123411	379613	76470	174549	130019	177725	1656387	770402	926772				308065	566936	204665	202764	257162	296321	168950		206410	1503297	712911	636321	2559925	2179324	1687296				271726	226754	597682	753532	1495129	711963	1897405	1124142	811446	610379	385436
m740	4.948	566.14	Unknown	6673	198085	186409	816733	1190844	1267070				962535	1022766	1365393	1123350	1050404	1374142	769526	811242	799460
m741	10.346	566.263	Unknown	46411376	21421592	7008660	4859738	4398348	4210686	77838560	58981576	55270296	615345	267078	737792	6993358	10816442	6601344	3035583	6910872	6034870	10078951	8616531	11423314	39334068	17960092	18249734	148283264	119519600	89147792	363934	465733	497686	11742449	9694982	13605001	17869040	54055248	29034466	56709368	41662516	38923780	27423362	27389770
m742	8.434	567.112	Unknown	1195663	1083131	1947611				446177	390271	497202	255734		200558									72110				59172	262875	242444		9178								77952	132047	229602		94834
m743	7.769	567.338	Unknown				103003	101786	116229			101674	105659			113834			186151	68292		127096	96494	113994	89628		67577		90466		286601	161393	127904	53711	87654	160509		90786		107335	70933	81231		93821
m744	9.394	568.24	Unknown	4312304	1244777	635455	2853283	3302044	4370915	24101960	18876494	24927304	67566	75685		7570826	8196160	7188362	4961458	3632968	4242568	769952	328214	835199	2734468	3048163	4010778	6219970	6372038	5315872				1274027	2373011	2521249	4847033	2482872	2988067	4014012	4532450	5501402	4997722	5100354
m745	9.627	569.244	Unknown	4571920	995653	613243	1913270	2481658	3595042	18227178	14622851	19574830			77774	5737538	5822528	5568320	4243706	2564158	3311980	1159572	854499	956982	4265490	4687512	7006635	8203464	8325924	7451904				1995033	4276585	4312170	8596687	4527480	4981296	4766040	5022800	5364908	4883484	5182151
m746	11.781	569.35	Unknown	524215	547580	835816
m747	10.6	569.383	Unknown							505322	405191	340118										84159	102649					7895	204481	147389								66435	91519	83989	117479	99401		157452
m748	4.859	571.191	Unknown	291396	165027	103517	326010	778807	667500				759448	839677	695107	495443	420552	682393	495454	643551	394094	208442	222801	73978	73513	426547	103336	110850	373475	86775				197220	100925	313227	398559	170019	428228	56561	164312	123385	2041	62767
m749	18.869	571.365	Unknown												96566							2619908	5116746	5386316																133907	121758			151102
m750	16.389	571.366	Unknown																			1618919	4100626	4708271
m751	2.899	572.196	Unknown	3566452	4534636	4358749	28616			1182008	1273386	569687	345780	217606	355894	21710	2971	2938		250394		204827	237052	160448	238577	500652	445201	150462	239157	361645				380474	258744	443523	297457	431432	411004	257823	1087674	752342	539748	413464
m752	6.636	573.177	Unknown	91073						299349	365232	339585											16528	191750		69472		624182	919588	614325				82868	64164	62463		139948	236310	54165	99701		143461	100340
m753	9.406	573.256	Unknown	2754068	1227874	555145	1939274	2225514	3022925	20058080	15988064	15919446				4393998	7976390	3912585	3231016	2995778	4837154	1146707	549724	956680	5190089	1932612	2997820	8078066	5869597	4702404	58302			1003251	2220913	2321920	3981242	5387798	3013116	7106055	5273958	4760723	3270574	3137072
m754	7.407	573.277	Unknown	202588	431137	345297	596482	481595	646867	507525	688344	847401	384365	703819	640462	536996	827600	619673	431627	807973	985221																			128244	125807	108361	197308	199678
m755	12.444	573.289	Unknown	128223						65395		85453			89403							2031692	2572272	2747612		87873		100017	30588	89606
m756	11.184	573.293	Unknown																			2857366	2457404	2654891													2128			72416	339354	153429	67642	214136
m757	9.57	574.262	Unknown	2328682	680675	120761	692122	1001203	1487191	10181211	7001219	8263716				2132829	4190345	1976648	1257054	1342546	2494012	866957	424404	835738	6266574	2727450	3543116	7273991	7574295	4895387				1318829	2957106	3285600	4922562	7096710	4417793	4639369	3791781	3524056	2685032	2104291
m758	9.715	574.263	Unknown	2536215	725527	124655	747912	1009584	1487191	4425160	3215683	3506152				2260412	3887071	2141182	1343136	573555	2537174	866957	453262	871530	6742914	2935900	3753115	8765370	7574295	4895387				1318829	3165931	3285600	4838487	6976901	4417793	5009644	4066709	3853233	2788804	2183576
m759	6.379	575.141	w/o MS2:Flavone base + 4O, C-(dehydro-dHex)-dHex; PlaSMA ID-1572	1930123	1871166	2078086							298165	440741	420087			10512				29762	22330	47689	36513	806019	43805	632750	61518	20421				45600	42776	61993	48668	40067	40953		400		2149	1367
m760	6.06	575.156	w/o MS2:Flavone base + 4O, C-(dehydro-dHex)-dHex; PlaSMA ID-1572	98782	193152	246881				2018			30007	32912	23651							347587	498219	113344	553550	219249	1352020	211450	113539	921550				217372	1228411	1474202	1018085	1017061	1103638	5072	32026	14221	105083	106077
m761	10.202	576.256	Unknown	5448818	3171374	1904368	958314	834502	881024	13137600	12867687	15520856		97978	166184	1710361	1866731	1785849	676586	1468699	982246	3630226	3692389	3135384	1720643	3409208	2866514	7202796	8438117	8557429				1528090	1116916	1186589	2932121	1972029	3355132	4991250	5137634	4780050	4727449	4314934
m762	9.502	577.134	Apigenin-7-O-neohesperidoside	14942174	21286664	21916884	291248	353246	165615	4958158	4784876	4895200	2835078	2830685	2726754	216121	90000	244899	335330	822012	670271	3357024	3859124	3483045	13952548	207403	13420	2363046	3222794	2750509				6091	5414	11147	186861	667790	689823	2515493	4256060	2687485	3040852	3288486
m763	4.743	577.163	Apigenin-8-C-glucoside-2'-rhamnoside	25595210	2566365																	70299840	67074896	64728244	71274752	77116200	75257856	61019332	76163240	67085332	42681	78507	164422	80161752	75394560	81253896	73522016	67746656	84132952	37543776	42490500	36626896	36391992	35489576
m764	10.344	578.223	Unknown	72855		93400	808575	1389540	813725	836115	729124	3511197		130767		1803459	965413	1923410	972547	707586	561533	23632	17436			32718	51814	73220	130102	84691				26232	241709	85436	247097	17573	38152		193706	138473	306341	264460
m765	6.335	579.096	Unknown	550358	565228	856493				434150	340606	687940	117953	220675	115030			94951	74396																	14911				61131	126893		78705
m766	7.933	579.202	Naringenin-7-O-rutinoside	164489			7893	14009	25										13560			2088015	1644429	1494132			77869		292385	260677				96571	723507	613995	1350736	1307145	1112456	25982	1332			429661
m767	10.346	579.237	w/o MS2:S(8-8)S hexoside; PlaSMA ID-1597	41438984	9300139	8774071	8621440	9384237	7974903	49703544	43455548	54453412	732554	762961	726923	13455054	8759308	15297767	7491132	5975766	4768701	6236716	6036066	4648680	6761477	17598532	18650880	33171426	46432900	55723016	701295	312356	545234	8589435	8176940	7812358	20529084	7761416	13073735	12864021	20497292	23199602	30698264	28054930
m768	10.206	581.271	Unknown	2914452	2850591	764793	336577	175178	206740	7809850	7838069	8221291	48639			592535	1487914	442248	273384	1040431	1029533	2380092	2981670	3023792	3801598	2481464	2133216	10101533	7474994	6127598				1322843	1320530	1371611	2270244	4248834	3351665	6102246	2850447	2709959	2101877	1754809
m769	8.515	583.147	Unknown	2836472	2489254	3012063				3389961	3121996	4249920	798730	517881	569060							87990	194233	330507				134619	119783	246595										432386	430578	599568	475635	580981
m770	10.816	583.279	Unknown	258325			102326			426347	296672	234421										98292	121214	60632	300142			571543	320011	159948				136679	196416	196149	416115	1305300	518650	435206	270574	327700	251953	136879
m771	4.871	584.148	Unknown		474785	230995	921120	566434	1323634	207603	174340		618896	911600	676670	843281	816604	836078	864418	1221654	802910		13860		1643									66490		10233	13981
m772	10.346	584.254	Unknown	7363948	2514211	1283511	1177599	1010238	1102034	11301944	9319969	9771513			233274	1584485	1762256	1404832	897722	1493876	1407573	1754700	1622953	1853528	3455142	3264470	3230503	10729848	11902575	11993031				2081371	1801173	1778019	4044870	4273057	3758841	5125943	5617969	5504034	5243482	4929640
m773	3.325	585.11	Unknown	2310870	2598927	4474968				7431																									6301	2196					19067	63502
m774	14.139	585.34	Unknown	337462	628902	810645		2161	4836				10000	17392	90908	3934								9406
m775	9.407	586.23	Unknown	3262072	391867	774192	3467435	4079335	5118140	18087392	14766248	22105964		105761	81589	8929760	6175024	9346129	6160317	2476548	3334464	524480	456212	264049	1064007	2777199	3757267	3069544	3647418	4203680		72263		820364	2103908	1625603	4970994	1091436	1703417	1784876	3166831	4139679	4728516	4585616
m776	9.507	587.229	Unknown	4408728	806243	658746	3765658	4682282	5259364	19214532	16983760	23783324			24439	9717106	6234532	10501455	6128158	3114546	4153666	738663	235023	176947	1881773	4076534	6838019	4162078	5795322	6137934				1634762	1600013	1433787	7408624	1767609	2905297	2885954	4141830	4862857	6133794	5799794
m777	9.611	588.232	Unknown	2150659	172384	324367	1418706	2076079	1766258	6807571	5850664	9618508	2272	3455	1839	4185958	2161328	3585891	2613227	1343746	1668421	641687	465230	60093	902507	2684444	4140302	2560654	3316986	3827293				1343961	2524133	2000374	5238793	1209044	1960926	1218163	1830722	2602790	3049136	2536562
m778	18.754	588.699	Unknown	544348	3273772	4266228	2312983	775222	3572604	946331	167949	3264276	634291	716992	1998588	533260	338856	507086	3404316	243269	649023	1882796	2532252	2454836	283383	4302418	3632923	564150	1934802	4030724	588344	588177	4262797	722924	755855	670735	1952558	954471	97257	748546	2182321	1755441	4154536	3218705
m779	18.626	588.7	Unknown	2057213	3091395	4913754	1004573	3226203	3423011	1113720	190767	2953330	828395	2788672	4416552	1068382	610745	798051	3287856	477456	455679	2241098	2916733	3059513	1217320	1155532	3226440	1913648	1834542	1726114	664273	386948	1353658	3059788	4015637	2524342	1998110	299672	134265	2341945	1460540	385082	4693234	1057368
m780	5.566	589.156	Unknown	2338639	241042																	5920480	6823262	5617780	5506639	8349190	7425044	6807101	7171268	8137570				7698394	7588492	7109704	8569645	5491960	7781544	2011811	2570420	3016264	2561841	3026496
m781	4.858	589.2	Unknown	402060	804187	761001	984883	1379665	1517478	349858	203628	396373	1232203	1384056	1463024	965232	1482959	1708094	1104697	1078741	1098551									9232												76389
m782	9.479	589.266	Unknown	368963	95711				250867	2112564	1447072	1755916				419326	451393	336433	161826	340350	155956	349060	133982	291569	1720473	583974	632938	1477406	1782350	1145524				117774	440648	650348	513000	906844	481732	1369511	562284	936734	701931	438320
m783	10.94	589.285	Unknown	47371	36566	190259																1225133	1916147	1060813						12914
m784	2.827	590.209	Unknown	707492	1436480	1339285	220053	1209		546802	819555	224419	149500		1875	48931	10951	24824		175377																	8550			245736	240811	246617	141776	232264
m785	5.318	591.155	w/o MS2:Disinapoyl Hexoside; PlaSMA ID-1619	3121586																		8715112	8129120	8343354	8480469	11270078	9899714	8596175	9694940	9978267				11167190	8551968	8069817	9741518	10158920	10657497	3475652	3962922	4396953	3681733	3838650
m786	3.521	591.156	w/o MS2:Disinapoyl Hexoside; PlaSMA ID-1619	2076553		31345																1933446	2286938	5755336	6325232	2069939	908437	2854200	4293531	6701510				2891498	905160	6346670	1541124	2125259	7151292	976221	424814	3517072	3095934	3201679
m787	3.261	591.156	w/o MS2:Disinapoyl Hexoside; PlaSMA ID-1619	2076553	5495	8815					1034											6576366	6854424	5007724	1802053	6075608	4734590	1801031	7548770	2137530				4604474	5068076	6665942	6268848	6065788	2390532	3331628	1669294	1094096	3064648	1026004
m788	9.391	591.241	w/o MS2:Unknown (carbon number 27); PlaSMA ID-1623	650104	153353	100453	552676	671656	920924	4258925	2941913	4068826				1522729	1486884	1359360	805803	897806	1086469		88187	174766	523390	507263	715572	1243170	1190863	1007045	1879			123972	355334	493287	837953	387225	531706	1041394	845299	1103833	885330	751775
m789	11.387	591.305	w/o MS2:Unknown (carbon number 27); PlaSMA ID-1623	86919	86831																	3222331	4464086	2912606					154248									26822			215173	94908	229101	141944
m790	9.911	592.314	Unknown	842052	1288793	1239054							18458		6871																											74959		64184
m791	11.448	592.314	Unknown	625699	1075212	544328																618460	465308	412391												12491
m792	6.023	593.165	w/o MS2:Apigenin-6-C-glucoside-7-O-glucoside	254375	2757	4327		7909		1336	2739	1276								1278		860343	817126	767513	948475	1477804	4189443	947534	1167353	3402422				1228734	1302400	4332725	1217751	953153	1294832	1020626	718309	1037731	1172717	472650
m793	5.818	593.167	w/o MS2:Apigenin-6-C-glucoside-7-O-glucoside	308666		947		30653														2608327	2893993	2844322	3084118	4289672	4406586	3123468	3939608	3402423				3865981	4153818	4377200	4371982	3922646	4552058	994528	267260	451193	1172717	1377913
m794	9.927	593.172	2',6'-Dihydroxy-4-methoxychalcone-4'-O-neohesperid	359211	438113	1029953	1882164	1999826	1830052	1401779	1078160	1274777	1550203	1635518	1524905	1886548	1601378	1829440	1529544	1551486	1359204																			223963		308768	25718	464733
m795	8.488	593.184	2',6'-Dihydroxy-4-methoxychalcone-4'-O-neohesperid	1106664	1062530	1416602		2205	25843	2071	2727	1069	134592	10171	109673	17853		15841	22167	12620																	16699				134985
m796	9.865	593.238	Unknown	416295	1116	491	71207	76254	106996	2535245	1624286	2284834			3519	510264	460185	272824	61892	141259	165265	11069	2226	1481	101675	327423	310877	249986	386118	496358				37852	137652	74569	72559	123232	115201	58264	341639	405023	364122	247461
m797	5.755	593.665	Unknown																			1152391	856256	744304	995155	1057230	1261580	769249	1172724	1019180				1171343	571788	496424	1230088	1081859	1468353			17705	1997	19492
m798	10.203	594.246	Unknown	4230710	1381876	1408303	872548	1447364	933559	9478588	9969003	13697995		66001	89267	2632483	1284305	3019629	1084390	1287178	1191102	2093938	2540868	1855497	621635	2945899	2262495	2551550	4853250	5133638				1098783	940429	790252	2234646	560923	2046197	2189788	3078230	3294348	4254464	3773421
m799	11.821	594.328	Unknown	1038523	2057848	1786271							54319										1937
m800	5.905	595.129	w/o MS2:Delphinidin-3-O-sambubioside	658085	867328	867068		36428	8884	109852	126773	70922	516822	440713	399833							284407	283799	103805	47234	8080		67304	218459	335555				10620	117591		298300	1982			228930	114925	266233	140018
m801	3.102	595.129	w/o MS2:Delphinidin-3-O-sambubioside	6315611	6111118	8146691		73074		1246965	1061256	1450207	768364	1154596	1004134				114243		7664	990778	995679	828459				886039	1327568	1082434					218400		482256	229403	362567	844819	891980	1367998	1732956	1450770
m802	4.721	595.171	w/o MS2:C27H32O15; PlaSMA ID-1650	98922																		2452579	1885580	1962742	2588309	2269786	2078358	1748567	1884868	2240404				2278935	2327361	2074589	2068446	2289872	3186456	491814	789591	633733	517096	460770
m803	7.806	597.122	w/o MS2:C26H30O16; PlaSMA ID-1653	2925316	3132412	3867668				4812365	3318243	4482008	588130	464197	816887		2510	8344		1806		154134	295016	79289				26788	344057	445729									1756	490052	572660	570030	565954	682508
m804	8.948	597.265	Unknown	8241						405377	477890	197343					26731					10601	141490	123043			61270	1383217	1503956	1374522									57195	94668		9993	90999	64833
m805	9.96	598.224	w/o MS2:Unknown (carbon number 34); PlaSMA ID-1657	366451	616454	508740	1771454	1648151	1565655	211490	37001	132974	1473275	1636535	1628984	1636992	1431529	1960717	1601386	1508777	1131948							10326									17095				22921		25441
m806	5.347	599.148	Unknown	17817		8529						1584										763456	773457	888392	542722	881499	1361598	730163	779638	131155				1225549	952978	724455	1033551	895924	1337141	114534	70411		17625	241358
m807	9.096	600.192	w/o MS2:Isoflavone base + 1O, 1MeO, O-Hex+C7H12NO; PlaSMA ID-1659	63110																8662		864037	1510737	900806	1267651	1110052	1796770	430785	1411665	1135945				1113216	2095092	1670832	1909061	1615339	1789634	321273	238040	217102	355983
m808	10.219	600.259	Unknown	598234	325944	157639		212817	105925	1769447	1670276	2039524				304206	339082	216736	157526	259744	299824	706500	704862	732733	180943	268103	276593	644196	26201	796830				213612	122678	137237	405277	438271	404260	816447	594503	389121	456846	318697
m809	6.677	601.233	Unknown	1747075	991033	54986	71977	101769	109120	83765	27689	73999	82594	59779	76190	98431	79725	101389	94320	60386	32180	1100826	1369181	1422391	449674		372036	762808	874177	1194184				86688	287304	76101	108100	115487	281620	525735	244018	234484	387187	308395
m810	9.257	601.236	Unknown	766112		70057	787575	730508	958836	5210322	4171788	6269557				2568593	1866299	2689878	1562927	750828	856745	383349	177563	104720	281734	478963	880996	491862	790780	681016					275033	181023	558706	112376	108490	443663	874553	999773	1111599	1147232
m811	10.223	601.265	Unknown	3619138	2183684	1671147	986586	875329	1091615	16190902	12646656	13224299	175097		147983	1356929	1624060	1562979	1584778	2598922	2103764	3550943	3821627	4126146	1880198	1832872	1680443	5692446	5190966	4985320				1546224	1421866	1478305	2682465	3865429	3613124	5227276	4150328	4783735	4081934	4035361
m812	5.274	602.171	Unknown	846139																		3694092	3671078	3190045	4802072	8493721	5534656	5301772	7042024	5313141		2717		10637370	5635076	6171230	7011706	6038488	5040970	1126907	1155600	1356288	1296034	1700368
m813	9.295	602.233	Unknown	780137	274800	261181	884994	856578	933248	5132127	4415976	6844776				2379446	1639886	2786798	1406862	626817	1050509	403228	120197	164614	349907	477592	1143906	710832	1106149	1377326				280144	110812	416063	1433679	366888	343937	616057	793898	1284376	1473561	1484492
m814	5.293	602.671	Unknown	437482																		1817401	1931024	1585037	2436350	2561574	2376109	2560374	2969306	5241285				3834124	2527671	2536302	5193330	2624206	4037712	238006	203548	169824	274924	591315
m815	7.163	603.185	Unknown	366367	141047					567819	625820	555588										329326	380923	215822	98107	174590	66712	1187069	1279715	1069718				57336	1408	74474	269138		239777	112650	350207	296067	140723	195629
m816	5.952	605.171	w/o MS2:C35H26O10; PlaSMA ID-1664	10595	4135																	202252	247624	317766	779705	343558	1038398	696861	1152270	856639				1147902	951286	797538	1266164	886384	1202470	207613	4048	254687	121083	36505
m817	10.336	605.258	Unknown	771400	159198		151005	144508	151060	1689414	1456251	1322828				248404	241077			237061	147116	210418	174573	212401	82062	415186	67011	938061	1198236	1277237				192141		225996	307770	388195	433295	317323	704900	547467	670843	537895
m818	3.744	607.15	w/o MS2:Diosmetin-7-O-rutinoside					4665														1251580	1218694	1400707	83204	812830	236711	178814	131136	137948				654556	124401	88556	96477	195369	65378		75945		8001	56268
m819	9.858	607.297	Unknown	357150	280446			74072		465415	601474	326813										4082220	3843456	3714892	162931			123562	1005945	1328679							262349	128887		214742	575655	908331	323109	398752
m820	16.429	607.343	Unknown																			342052	1102656	1351891
m821	9.384	608.259	Unknown	388592			342401	295180	694735	2855432	2830456	3126519				1046082	976353	908988	1365680	908318	1115632	119526	76966		248946	106856	406903	368900	472936	209064				109852	58401	129722	277956	216705	347508	789285	528370	728172	739538	485268
m822	3.284	609.184	w/o MS2:Hesperetin-7-O-neohesperidoside	215161	1191531	1203441		1477								3608						1182060	1163929	1227774	637093	719169	734584	580056	666855	682443				738730	654095	700121	663280	718118	670548	385475	323584	429511	494614	321552
m823	9.766	609.313	Unknown	88480										29261	55453							11544332	11581976	10920272	22949	94381	84110	1467094	1479597	1212531				62614	32733	208875	1228343	451316	239825	498059	672550	1648550	2002246	1672660
m824	10.724	610.324	Unknown	582582	1573546	1605382																106781	100668	104903																		2055
m825	7.96	611.137	w/o MS2:Unknown (carbon number 26); PlaSMA ID-1688	464787	584482	890986					72113												65340																		20157			3963
m826	10.561	611.209	w/o MS2:Unknown (carbon number 28); PlaSMA ID-1692	413089	565758	623960
m827	7.648	613.094	Unknown	599535	940461	1147840				147119	213762	181991	12792	19070	23181	1327		1219				164695	697194	590893	190578	130289		1236367	954370	777771								177254	118102	512864	353313	351430	126919	340570
m828	7.334	613.12	Unknown	6600320	6936214	8972354				8375520	8048179	9954634	1652331	1458748	1857619	87178		87878		69737		786506	693175	917504	154285	302130	68638	649043	905043	973564								4164	131218	1651071	1869930	1969502	2052030	1791569
m829	6.075	613.14	Unknown	354713	283357	198266	331429	261110	314337	673975	381490	519995	615393	476142	713546				591541	554609	526014	715330	627900	482627	111534	211453	23684	742505	484517	487012				315842	543692	466222	2193230	1405533	888513	611857	703495	758936	811723	607485
m830	8.012	613.193	w/o MS2:Unknown (carbon number 27); PlaSMA ID-1695														8799	13802				257179	714886	850548	404779	500815	705444							343112	592792	340282	419636	760341	297711		92065		70068
m831	16.307	613.374	Unknown		411440	93121									73610							1776899	5063158	7416933																	103316
m832	5.762	614.167	Unknown	1781	4066				1628	3717		1168	1195	929	1261					1827	4653	56851	53243	44071	808839	546090	245474	682128	184645	701872				542063	690074	654233	320383	335627	677426	4517	11689		108041	26101
m833	4.838	614.263	w/o MS2:Unknown (carbon number 34); PlaSMA ID-1696		183506	179825	378192	356605	376095	382095	290386	247082	349784	355982	371995	268551	290332	529737	280475	435498	253000
m834	7.887	615.138	Unknown	2279456	4224438	4751512	329076	584444	535080	66473	124333	287359	76093	69179	99617				566883	448502	375234		38015	18230						13435				150892	301754	131241	715655	303619	417334	121365	308663	400790	545156	162473
m835	5.806	615.177	Unknown	75304																		810519	1117214	1378122	1041241	1429520	1232676	978800	305028	1282220				1493705	1505465	1864736	1291711	588329	617988	4029		61697	145153	30580
m836	7.37	615.25	Unknown	5208011	2724658						19136											8356379	9531577	8065702	1004669	580467	717403	3497302	4168535	4222521				608942	578721	302542	1579109	1057268	1937820	1629487	1881379	2023683	1858607	1975054
m837	10.11	616.274	Unknown	700393	1011225	204652	325948	148060		4264952	4430580	3819122				232824	312090	279959	114106	349864	349745	1888667	2002140	1764412	401445	401772	324592	801795	888487	844768				71867	121961	115331	484846	473417	466861	1989552	1421217	1444928	1191877	1214964
m838	7.106	617.149	w/o MS2:Unknown (carbon number 29); PlaSMA ID-1703	823314	898202	1417008						2387		264342	230237							1764	1291	12261	943				246	4235						7629			4543				4649	96823
m839	6.431	617.172	w/o MS2:Unknown (carbon number 29); PlaSMA ID-1703	78041	2248	7206	9813					10517		1778								3328335	3465712	3139976	225198	64015	766907	935837	860574	1005073				124423	653810	322544	633727	378014	686358	128361	509895	503875	423764	196216
m840	14.407	617.409	Unknown		122383	52587				218891	363186	264744										1335408	3600072	5872792																	1623	74801	38729
m841	7.677	618.217	Unknown	2001151	1081177	1842629				911661	688439	697911	245811													67615				124661										274179	330941	895965	615752	402350
m842	6.265	618.217	Unknown	568585	1458871	1143688				96509												847348																			8009		8131
m843	10	618.249	Unknown				9577	57369		639411	401939	914085				9679	8045	16641	17093	13411	9329																2585				73893	85726	83956
m844	10.23	619.254	Unknown	3116422	1562176	1751644	1138508	1021769	1002373	13086373	9981677	12242954		149134	146711	1481814	1039617	1923581	1708330	1907005	1287915	2318393	2543616	2050095	985409	1728548	1542285	2507898	3521144	3183268				1144961	1083448	1099862	2495940	1416528	1955611	2724779	3599191	3208999	3983321	4449802
m845	18.869	619.422	Unknown		84214																	828700	1667420	2708846								50495								98618		69662
m846	5.994	621.168	w/o MS2:Unknown (carbon number 28); PlaSMA ID-1710	469363															10359			3127534	1603867	1023658	3207334	3776644	4839109	1569587	3156666	3420353				3845410	4232044	3921418	4396595	3233370	4440163	531405	1535169	1501618	1705728	410091
m847	2.891	623.164	isorhamnetin-3-O-galactoside-6''-rhamnoside	1504032	1275099	1142762				61782	81558											57835	24757	1042060	1279282	67148	391117	66173	680312	188654				121635	530677	104515	62194	71526	163140	192682	232966	431815	675691	368858
m848	9.425	623.217	w/o MS2:Unknown (carbon number 36); PlaSMA ID-1721	257345	20776	54591				1028480	779456											3598192	3672430	2094443	3288812	3645408	2061561	2889784	2780230	2793621				2028797	2004413	3392915	3779658	3353216	2382412	1225692	1195028	1077682	1661103	1232234
m849	9.578	623.217	w/o MS2:Unknown (carbon number 36); PlaSMA ID-1721	368128	97794	125809																3598192	3672430	3472084	3264544	3645408	3590361	2889784	2780230	2793029				3662307	3578133	3436282	3779658	3265190	4152010	431317	1195028	365918	1556526	1232234
m850	7.677	623.219	w/o MS2:Unknown (carbon number 36); PlaSMA ID-1721	769507							11773											3933207	3846420	4067934	3851663	4616554	4555290	3494774	3920306	4348636				4661078	4559652	4850403	5151978	4435118	5276070	1922352	1893600	1940572	2374447	1855098
m851	8.541	623.298	Unknown								77227											621886	371022	670434																		19702
m852	10.25	624.268	Unknown	550563	333971	177695	115269	110197	85899	3394138	2683424	2787234				105647	199524	168352	100420	162041	149906	419069	274699	405621	486010	376790	263213	747032	776168	462479					153123	263979	374705	1052617	552500	1474027	1130285	980612	637156	823309
m853	7.727	625.118	w/o MS2:Quercetin-3,4'-O-di-beta-glucoside	1463758	2061721	2302044	8885			1010097	1083961	1512602	101522	2908								286260	234682	116005				93801	275310	161324										191590	326154	72953	18875	159469
m854	5.763	625.159	w/o MS2:Unknown (carbon number 27); PlaSMA ID-1726	65744																		2501056	1756848	2464199	2276703	2903299	3541163	1518861	2761168	3179746				3304360	3482654	3560497	3741856	2526481	3066519	828347	1054168	807359	1473415	636673
m855	11.984	625.247	Unknown	1130032	1771644	2214352								13391																52115													57131
m856	9.38	626.243	Unknown	251142		110396	513279	535172	322870	3588445	2355204	3704032				1015702	957843	1220769	1550714	773411	872058	71849				118584	228088	186332	214849	307681				73559	139178		569322	127558	266836	526077	492363	609341	623753	547908
m857	8.483	627.136	w/o MS2:Unknown (carbon number 27); PlaSMA ID-1729	1658260	1478774	1692376	1945	2130		1705089	1292305	2160313	309110	113915	351735					108109									26019											75445	126452	142725	222034	97336
m858	7.46	627.138	w/o MS2:Unknown (carbon number 27); PlaSMA ID-1729	1519530	1834546	2352885				1406230	1742137	2125652	114524		201495				5142	8307		48324	87541	5136			10623		89206	13877					9399			1170		105135	122028	242407	89665	74681
m859	5.914	627.177	Unknown	5797429	402118						789	240			565							22210240	21155556	21030534	20320028	26516368	27087836	19730494	24229346	23993282	57848			27389764	27647672	26105670	28199466	23590336	25226698	1717159	7531464	8250068	8425523	2007619
m860	10.056	627.271	Unknown	491738	145919	509346	5077	12812	83253	268463	793333	232440	106069	176699	99102	31857	4060	40993	30049	7573	10255	624073	912325	715452	5099	13530	22800	60133	389434	369791					10503	6440	43848	8899	7740	340300	458239	396126	584074	460454
m861	11.537	628.286	Unknown	216517	655022	754852									14307
m862	6.688	629.116	Unknown	2243064	2653452	3149113	71015		133184	3444104	3123486	311816	649623	392550	680754					72436		204748	89009	11113		1349			87724											164481	363704	528256	458212	320156
m863	6.546	629.192	w/o MS2:C26H34N2O16; PlaSMA ID-1731	163007	9082	8074																3155942	2310808	2839503	3541629	3900116	3966824	3099686	2288584	3131768				4942812	3597266	4312182	4862822	3566166	4471270	180303	943197	1018099	740744	638849
m864	6.429	629.194	w/o MS2:C26H34N2O16; PlaSMA ID-1731	328390	15116	8778																2350414	2773839	2509588	3332048	3822083	3966824	1000871	1953842	3076120				4701389	3571323	4279098	4606820	3412764	1566042	313289	700170	782049	927576	798277
m865	13.258	629.371	Unknown	65178								94387									99800	937636	2235415	2553556	56874					93912
m866	11.821	630.306	Unknown	504323	1076511	1398954								65671
m867	7.452	631.132	Unknown	20664614	22779422	23579662	18822			463236	552442	405994	447302		294864							530008	1272550	718787				53621	94805	157163										2189846	2494538	2105208	2519054	2181670
m868	6.829	631.133	Unknown	1277426	1177816	1445608	8365			1430243	1907976	1642368	108551	89962	112333							60037	23193	5196	7058					2086					9055		4224	1149		146027	227628	171244	211335	94551
m869	6.655	631.186	Unknown	10566																		725394	616068	719250	569092	1287151	502742	618004	896995	376125				894395	1013073	1206849	909746	1029294	1035373	151077	111627	553200	250986	215791
m870	2.36	631.212	Unknown					12598		381												453218	1209790	1245890	1132014	1054013	1104156	1422601	1520268	1426444				1428783	1518863	1646871	1624781	1318532	1479511	422806	589533	143207	333937	514015
m871	7.159	631.248	w/o MS2:Unknown (carbon number 34); PlaSMA ID-1738	242824																		3726810	3824227	3692992	58861	122671	161107	647815	867352	784135						72801	147739	180440	217370	121574	445276	362039	129529	255195
m872	9.389	631.258	w/o MS2:Unknown (carbon number 34); PlaSMA ID-1738							1010738	569797	739912				180712	326812	72047	141680		89457					63634			7499	64363									133501	214146		158711	128381
m873	13.667	631.382	w/o MS2:(2S,3S,4S,5R,6R)-6-[[(3S,6aR,6bS,8aS,14bR)-8a-carboxy-4,4,6a,6b,11,11,14b-heptamethyl-1,2,3,4a,5,6,7,8,9,10,12,12a,14,14a-tetradecahydropicen-3-yl]oxy]-3,4,5-trihydroxyoxane-2-carboxylic acid	2070309	6169031	3190436	60421	71532	286677	1448278	1114417	1391225	722313	820331	1091342	111369	214870	115473	404777	475036	718572	152059856	307351424	306540960				728956	1145793	935848		174898								7052051	7749861	7092168	6255810	7959518
m874	4.814	632.203	Unknown	830145			3249	13596	238778				9466	16349				20289		27591	14514																			1142816	1023108	1092619	886515	699304
m875	8.278	633.144	Unknown	2223624	2188519	2355674				676912	762185	520736			69438							960849	1873827	1365776	432040	471638	101077	2190249	2041688	2401045			8479			60427		71483		582914	427750	816120	647692	777814
m876	4.148	633.164	w/o MS2:Etoposide	1143019																		11896343	15964830	14565835	973092	620138	1715511	2451124	1889827	2022471				488538	413256	242165	522690	1711238	1373912	1972732	2032660	1595037	2143032	2878518
m877	5.178	633.165	w/o MS2:Etoposide	1495580							7390											10462885	13119210	13190765	801959	2167301	1584641	1930192	4982048	4783309				1613294	1918348	1738168	2767327	4112406	1484233	2286322	2679086	2228021	1902553	2001188
m878	5.001	633.18	w/o MS2:Etoposide	1160426							8315											1723734	2567288	1966430	1786300	3883793	5278641	3512953	6929305	3349896				3685803	4619320	3106689	4177047	5485170	3691327	2238798	2013795	431714	1947225	179810
m879	10.116	634.262	Unknown	988760	414656	503433	160879	173204	121456	3541211	3471456	3987476	62311			358967	323174	499986	249837	449608	340207	1298673	1191852	1067159	97542	250809	369113	202525	657964	433682				69999	67151	222011	410868	245121	453099	695564	1385264	985450	1039697	901528
m880	5.021	635.181	w/o MS2:Unknown (carbon number 29); PlaSMA ID-1747	71879																		1805268	1879786	1414612	744545	2063990	1032248	1221979	1360578	1559585				964219	1018856	902700	746208	893391	1879846	24255	76771	17699	570861	73581
m881	9.99	635.29	Unknown	1527817	266046	8421	736778	675466	773467	2482018	2169572	1557055	99670		83181	38129	22755	268927	435582	878043	673135	2038244	1447690	1437400	1093400	1088020	967108	4065018	3188884	4088973				2025921	2056528	2292136	4413388	4837093	3500712	2114247	2151541	2221534	2136622	1795648
m882	18.869	637.432	w/o MS2:Ginsenoside F1							7681												3296618	5454742	7312898																122652		71199		64680
m883	10.012	640.303	Unknown	223523	82010			124635	91474	469134	507803	378623					79018			236584	110559	729151	1014919	690732	696797	292888	314472	1536671	1218284	965336				762516	727881	923392	1089130	3463849	1348779	1178310	458602	734907	426738	430502
m884	10.058	641.227	w/o MS2:Unknown (carbon number 36); PlaSMA ID-1778	5853282	324336	57293						430										13460494	14081476	12845899	14005616	15943922	16112552	17374690	18109952	16715648				15733415	16299348	16058481	18087856	17031860	19401088	6781467	6661958	7759513	7522802	6969330
m885	8.101	641.229	w/o MS2:Unknown (carbon number 36); PlaSMA ID-1778	405254		9420																2566518	2355612	2148532	1809939	1893215	1969268	1678844	2408838	1763396			12547	2239070	2126230	2447424	1950832	2201572	2655063	811958	884070	990911	1006513	802538
m886	9.266	641.253	w/o MS2:Unknown (carbon number 36); PlaSMA ID-1779	84001				2914	268221	1135986	664448	1259131		18680		171730	267180	394209	406852	428198	185526	33691	30666	28483	30447	33662	32571	50987	41333	45047				36852	61294	36226	39950	37833	42257	15549	207769	143520	194854	19325
m887	9.615	642.276	Unknown	1363786	346651	207273	410400	63254	181072	4051357	3407143	1862959				121289	183483	263949		23203	12360	194164	449419	336236	474588	541272	718149	2480218	1252394	4405658				359406	52287	658515	1111274	670679	384380	911200	1029420	816466	1713779	879613
m888	6.973	643.132	Unknown	714720	1525008	1666245	53900			1330741	955521	1493086		111429	46739							13279	35352												956	36852	406	6021	69981	134960			74315	119039
m889	2.681	643.169	Unknown	4350272	224881																	18647458	18032052	20275736	10331540	9791203	8105695	20424836	8011393	24818306	15878	164331		10205473	26556244	9721067	11234524	23886588	10471989	3230985	9356605	9309305	9141160	10282209
m890	9.431	644.231	Unknown	43924			57652			392606	212185	363224						69425		99335	56566						2190									1688				62729
m891	6.79	645.149	Unknown	1950899	1829305	2613505			24324	1692253	1807725	2138055	205949		28473							159941			3827	11535	238		30553						1278			110395		204383		127843	65599	115940
m892	2.996	645.19	Unknown	6720258	798839																	82067856	50323056	76198856	48578812	22405982	22958964	20409502	21135608	22844170	224712	109458	48839	23401550	24102830	23265182	26497084	22482284	24861464	40735996	35054868	45039676	44002500	44113832
m893	3.412	645.19	Unknown	35043400	2695648																	20316766	106699984	19707954	34252188	93468864	89063208	75145640	23678958	90813792	684798	399689	257531	25452336	126758104	90277136	101404240	88013576	99050160	7664826	8656734	8982611	8396800	8828545
m894	3.53	645.191	Unknown	34823104	821427																	19473918	29810956	18836638	34252188	96216104	39753288	75145640	89269600	90813792	280256	399689	257531	92052280	129903720	94024872	27193012	92287208	99619064	7245551	8260921	8607241	8017074	8451812
m895	2.92	646.194	Unknown	7230240	15152	18478			19786							8207	1706					5255364	28663322	20558616	13881512	5961014	6050974	5122250	5694956	6095602	14796			5867034	13544722	6156621	6456302	5924224	6172000	5620160	11724464	9684943	11600736	11936231
m896	10.886	646.3	Unknown	667004	946782	960933				846
m897	6.699	647.116	Unknown	840395	841060	826541		65406	54592	120255	2030	200036	1087						2294			34094		44122																20203			2091
m898	6.519	647.182	Unknown	191843																	4160	2165505	2488863	2315509	927992	489519	712104	711027	546099	229283				799796	471403	187861	857416	189684	1237882	196695	475455	89206	458966	164271
m899	3.262	647.193	Unknown	241842																		523572	2587090	5631148	6650846	7304111	9756116	2375540	1905850	1705609				1897773	9686601	1921334	2172732	740508	7314894	1588332	519529	420078	247512	1607096
m900	9.61	647.291	Unknown	647653	122312	141134				1413935	563143	416393								123774		154615	140243	485440	474204	72653	292910	3155800	1961764	1152430						69418	175775	538643	398521	799746	545203	286910	288187	267100
m901	13.355	647.378	w/o MS2:Unknown (carbon number 36); PlaSMA ID-1785	239825	503601	194912	965416	1233532	1665608	3159976	2041301	3113956	132347	297428	228214	1102520	1402755	1185508	4108520	3863206	5455526	1832364	1216457	1489689	86250		189859	245579	428585	381924				132404	181364	151155	548092	227973	233942	989565	879274	341906	513880	447786
m902	7.749	649.141	w/o MS2:C29H30O17; PlaSMA ID-1787	7831370	8458050	8653813	449		1023	2447711	3233108	1533905	448635		168326					968	369	2419240	5162248	4493324	1434132	1401118	370204	6411826	6476833	8027785				343255		475	1080	1353511	1040317	2280124	2744011	2925559	3021280	3102449
m903	6.269	649.198	Unknown						89307									59859				262219	74192	490151	177371	1001806	949020	423426	862191	270011				1167286	1205162	812772	347335	225095	446161	85538	9258	28886	400230	98708
m904	13.041	649.319	Unknown	922998	1571577	2026554				440235	218041	369259											115071	64064				170961	213977	194858										69182	103881		161623
m905	16.307	649.347	Unknown		186896						19604											1143686	3582852	3902087
m906	6.017	651.17	Unknown	281655																		2326246	2394032	1025210	3114049	4190822	3615722	1167892	1464129	3871376				3804981	3518084	3703235	4380045	3638408	3423263	422969	474426	787569	454800	1543247
m907	3.825	651.176	Unknown	20310																		3625315	3964380	3788568	265614	67461	407750	285035	857283	849576				38149	98534	187907	59158	436346	101390	150322	161655	380931	381565	603325
m908	2.879	651.176	Unknown	511220	93618																	1748436	2096889	2038523	590905	245716	242452	2772902	1713901	2230464				363613	128500	415849	564363	551404	763809	425896	232822	412242	426708	447811
m909	5.432	651.177	Unknown	1417169	15014																	4443804	2352576	4303130	654846	969954	767325	2573326	4087986	1968765				787634	660064	766905	854481	791280	838152	856428	1523860	528917	1473588	795564
m910	14.313	651.37	Unknown	285618	282831	318952	212477	164094	280742	7063260	5056438	6996408		71777		468005	405706	615595	707744	622936	494319	737833	695526	737501			34101	359290	411701	403289										336914	669380	717740	860405	678436
m911	9.979	653.278	w/o MS2:Isoreserpin; PlaSMA ID-1796	16548612	2033898	1155132	11897290	11685282	9725012	24567252	21359140	21992756	1534178	953954	1414674	2506522	1560943	2661128	8740448	9886401	6843638	13961869	14383776	12326651	4169260	12349002	11521999	23151890	24624494	32579540	87032	247476	207055	21997884	20463156	16813348	43830304	17243850	27470764	10420307	19433822	21640934	25582306	21387684
m912	9.751	653.336	Unknown	2048502	486841	357427	579283	477273	580993	4095234	4254984	3326331	156341	136840	144950	393411	348441	363774	761668	668894	699613	2263454	1893560	1956542	876889	1002969	944762	7527419	9354237	8130974				1235294	1186103	1265314	3094184	3488098	3597294	1833523	1862277	2210738	1572206	1704466
m913	14.734	653.38	Unknown	14736195	11591772	10739434	2942661	3087371	2600989	101815088	85099056	118468032	1308657	1313958	1090813	6217508	5107910	7501742	5576190	7973550	6430729	35182344	58093804	53432860	1570444	3097083	2871863	8851869	12985176	12013342				1080458	1076835	899332	3567011	2323916	2909201	18897616	27680144	22589888	27168010	23502258
m914	2.914	655.154	w/o MS2:Unknown (carbon number 28); PlaSMA ID-1802	115149																		1109087	1060930	964257	7610		3784	340640	671111	586703				46884				4826			83230	148060	185781	61176
m915	9.029	655.284	Unknown		5528																8298	2165695	2333823	2100927			61695	2798		8645								44547		175151	117694	35445		2367
m916	9.395	655.355	Unknown	18515						28151	26829	11768										4100921	4089793	4086454		9233		58253	99334	82434				7666	7758	8460	36867	26513	19205	491766	486198	574340	652862	561742
m917	6.675	657.11	Unknown	83982	394479	390524				583112	525555	935098		11211												65849																62744	70576
m918	9.434	657.282	Unknown	4688904	1298727	1325071	829074	891560	800952	15243545	14940849	14715683	221859	123193	198089	1927402	1694956	2848231	1213950	1800831	1120768	2758379	2760650	2979534	405832	919631	496726	3453947	4031737	3314836	54820	10939		220410	94153	106534	395808	206196	277262	5138338	4637240	4577260	6101069	5833541
m919	9.972	658.292	Unknown	7187218	1670598	723441	3330182	3229152	2997038	13528256	11845649	10650562	322250	226404	336416	461806	1065742	425715	2063541	4212644	2843249	8545566	8514993	10249727	5128047	5054304	4965302	19481718	18112668	18466650		62842	123110	10523482	8558842	9402479	19865066	22445160	17918346	9904613	11229802	11220083	10070709	9108744
m920	6.598	659.124	Unknown	1444910	1722794	2279887				2129545	1978405	2155480	395170	108813	285936	1935		8584					1940				14464		83920					2255			4977			69070	217864	113166	231805	97686
m921	7.911	659.242	w/o MS2:Unknown (carbon number 40); PlaSMA ID-1809	154946																		2622391	2550834	2835192	263299	164278	296598	365467	281278	606221		1735		341882	433269	573127	609677	467866	700324		245828	29331	96261
m922	5.422	660.174	Unknown	664317																		2366706	2395446	1890523	3376288	3370638	3058878	2154390	4546641	4103818				5050916	3022445	3864124	4705268	4120006	4152424	788288	655102	755521	1053466	394714
m923	9.615	660.268	Unknown	3308786	641619	229186	388279	415584	362910	6178428	5171031	6191084	10150	12555		182952	121422	450230	483569	251052	344788	1053860	1093363	422692	642684	1633708	1985396	4188640	5598422	6598315				254718	272867	277945	1086565	314682	483586	1624881	2550810	3154763	3221931	3408553
m924	9.243	660.269	Unknown	513028	49823	28572	2268166	3283110	2931959	1936322	1243394	1895263	81200	100464		992002	373119	1238070	4100063	2507211	1995132	649097	371566	156556	78099	365850	342567	673756	821858	932959				302807	1590924	1657980	4833158	1073760	2540195	472281	786304	786286	753287	848750
m925	5.529	660.677	Unknown	71594																		1077770	1309737	754103	1326913	1790097	1465993	1579424	1050154	1446340				2636398	2295042	2003898	2506437	2296443	2092203	91176	705670	68328	578104	263634
m926	9.603	661.272	Unknown	3265774	349148	453234	742081	869823	719845	4623908	4224414	5770331	7611	99021	13358	393465	218421	204966	1094960	517559	634803	2014203	1918636	1294651	899529	2218855	2449164	579610	4839092	6564844				2356290	4231064	3621962	7894753	1693697	4351047	1682864	3005663	1392556	4677929	3948124
m927	14.344	661.396	Unknown							2087231	1206063	1364866								277171	251733	153818	309826	255555				88429												142645	118470	126659	37100	58464
m928	9.41	662.299	Unknown	1037577	589523	164728	152997	237411	27893	4879778	3764187	3028349		65924		381357	524851	267259	306762	267069	247341	992571	939896	1319116	325707	303500	240098	2098404	1066959	753338				44089	90649	60807	203965	815993	523567	3034064	1927084	1103422	1266725	1583726
m929	8.053	663.196	Unknown	87469	194																	753365	1150070	1493158				190363		87381							4807		1096		64564	153319	250051	121033
m930	9.969	663.305	Unknown	3607707	1221177	368187	1824238	1322335	1622259	7605187	6243781	4156175	200970	115378	290422	476873	503983	283245	884367	2881268	2170562	4724446	5196252	7485678	6501282	3067682	2701937	18890926	12720872	11287574				6546304	6078712	7487472	10106623	33889352	15322412	10452498	8394879	7381966	4881715	4925206
m931	14.74	663.409	w/o MS2:Medicagenic acid base + O-Hex; PlaSMA ID-1816	3607398	5033440	2393375	463132	650364	610763	29185420	22902520	26939036	391114	268291	306107	1079946	1727400	1206078	1020267	2279520	2073511	14975735	22719926	29420608	1763186	865430	728259	5396280	5633239	4226524				345972	371643	460317	959656	2219636	1438676	14751277	10449649	7782843	7579163	6013223
m932	9.16	665.286	Syrosingopine				578870	643994	651169	1259708	698741	2310997	66581			490020	399411	966474	1482924	718135	1488760	419460	148668	404234	135358	130731	261382	212473	307538	213551				241316	445766	414880	1325436	599340	1025808	771025	344040	536056	470911	405669
m933	11.062	665.32	w/o MS2:Unknown (carbon number 34); PlaSMA ID-1822	1725654	283678	236566				4352054	4561570	5156313						70718		37766	64919	1380709	1669962	1707543	275338	526318	175693	5941546	6143463	5739008				222920			361564	591374	788286	912008	1307866	1206604	918071	1203948
m934	8.306	667.272	w/o MS2:S4:16(P3:14/F1:2); PlaSMA ID-1826	562710		18179	4383		16995	696071	1118151	1135451				18631		176925	12605	3159	5436	455584	443739	353942	76554	70923	177974	1844540	1640335	2259327					4644		595992	112677	265289	335427	422511	315870	428274	617235
m935	12.419	667.359	Unknown	1862014	802316	1331990	1025303	1199158	1332449	13044864	9082076	14514034	93196	464416	417944	1815596	1488559	2108788	3092776	2040923	2525734	2646644	1599138	1266604	199321	478119	436671	1724060	1634602	2344209				118013	309805	280729	802868	332221	537446	1502577	2110895	2367648	2747247	2124656
m936	13.658	667.365	Unknown	624717	1623097	992858			62830	834722	482713	765825	164592	260352	398303		62415		215919	112438	145448	34308212	64714184	55008052				65446	391741	215719									6174	1557132	1784795	1848286	1683212	2358281
m937	5.917	669.182	w/o MS2:Unknown (carbon number 29); PlaSMA ID-1830	4285046	353340					1643												10909758	12301425	10954159	15485062	20183888	15452873	13808896	14511161	14236880				19067056	17356874	15839055	16149197	15543131	16280867	5922045	5948646	6391579	5994599	5594520
m938	4.838	669.237	Unknown	733787	346418	274054	477006	450752	886161				784069	606636	640972	458907	653767	775558	425946	752108	562512	1450509	547587	552448	1611154	1296278	1183506	1520050	1409515	662795				663180	1266754	1586646	1007544	1022915	1019120	599550	590359	299870	643129	825902
m939	8.527	669.288	Unknown	431375					4687	957375	667140	684379				163382	225483		138266		28015	573885	364473	318718		10747	10269	844485	958277	898939							152398	7234		288346	223752	90413	55716	331733
m940	12.425	669.362	Unknown	639271	333824	697420	405550	507285	530786	5209130	3810738	5953490		13387	82923	569834	647545	697128	1396538	925409	1007506	1556252	729431	663048	122446	213829	133811	449087	691368	671557					66159	58259	292629	82345	135335	645487	776972	939882	1129866	752916
m941	9.142	670.298	Unknown	3982		8877	3526	257092	188782	727617	642131	483385					208024		530922	439059	522600	764631	69703	362803		56670		95408	7590					266574	161993	330167	471093	863432	736963	269335	274478	364525		293994
m942	7.012	671.126	Unknown	2141447	2316930	3114745				1423691	1083914	1397788	20004	102750								97816							66931	85527										210404	184415	334514	554325	238466
m943	6.147	671.204	Unknown	145239					418													993270	2862376	2160084	3062120	3221469	3452192	2951378	3210783	3747516				4644642	4656158	4197520	4666604	4052542	3713288	690134	328818	623965	423459	838139
m944	7.197	671.277	w/o MS2:Unknown (carbon number 32); PlaSMA ID-1833	514662																		2863545	2807109	2636435	2061354	1726544	2135838	2203394	2187820	1771166				2438040	2435016	2343604	2956300	2833195	2431927	1011407	1157657	1036688	1007037	1179009
m945	9.578	671.278	w/o MS2:Unknown (carbon number 32); PlaSMA ID-1833					3738	31578	13089		3248									17196	415934	1798511	1510426	1801512	1280412	877202	1425920	1621746	1076022				840612	566725	448121	425298	764476	651177	172232	242568	235677	29498	86350
m946	7.512	672.166	Unknown	1055532	1034397	1085735									4859							3498																	1768		75106	58401
m947	5.768	672.201	Unknown	57240	3128																	340393	181975	504229	824378	940197	1155641	1000293	1260388	760193				813683	1404564	1354557	888965	1020837	1558852	15758	169599	67586	9244	170621
m948	5.736	672.692	Unknown	18073																		164091		129963	307946	459556	124469	264782	128194	358431				688777	314284	636020	362155	151407	552771				7335
m949	12.16	673.303	Unknown												54933							1981474	1937498	1913357						1565												65493
m950	10.029	674.277	Unknown	221209	79387	323336				1196764	1041619	1143140								272610		122321	82086	150243				15738	4883	24149				15530		8020	24183	43416	32309	460179	347026	87960	140341	153752
m951	4.963	675.159	Unknown	378337		12954																1373757	867547	1569552	3770182	2657591	2090241	600746	1889848	1662519				928504	1672366	2519103	2070538	1237484	1935942	253519	224666	359243	165966	598980
m952	6.438	675.193	w/o MS2:C40H36O10; PlaSMA ID-1837	2655012	2727083	3118014				543915	512003	457912										1516384	1713717	1340982	48398	144884	161968	2578291	3244552	2967716				471789	99265	400148	101012	293604	198756	279360	515839	266595	425044	311902
m953	5.53	675.237	w/o MS2:C40H36O10; PlaSMA ID-1837																			1989829	198678	771042	364483	744308	883824	198135	330321	692255	56756			276467	662770	792737	2111220	2815722	2393858	128125	313966	37140	22508	64151
m954	5.835	675.241	w/o MS2:C40H36O10; PlaSMA ID-1837																			418395	525232	1274931	1289381	1867129	1339003	556097	843461	896708	4884			714047	1961125	1383472	383746	2349039	563614	544655	49952	107219	71963	3992
m955	10.036	675.289	Unknown	67371	978	840				241491	215414	178772				17570		5639	896	29882	34046	3732955	3981152	3455055		29668	85239	112711	116426	203703				137779	6857	47224	230815	84250	557504	351299	447029	365849	658090	392938
m956	11.713	676.297	Unknown																			360761	562171	648835
m957	9.017	677.143	w/o MS2:Tricaffeoyl quinic acid; PlaSMA ID-1846	698957	834079	527143				104041	41001	43346													2895																58769	7487
m958	7.371	677.169	w/o MS2:Tricaffeoyl quinic acid; PlaSMA ID-1846	2315922	1548573	1395437				1080599	699958	549511		81293	40331							307255	1177751	1242880	1409	22730	54198	1237002	698373	1329865				10525	1667			122470	107562	110999		150127	169576	265716
m959	6.25	677.17	w/o MS2:Tricaffeoyl quinic acid; PlaSMA ID-1846	97974	10542	5149				2440	4229	1994										1972186	1282515	1195007	673130	1741940	1427328	779206	1138069	1669303				1538743	1512886	1206903	1313838	702469	2052150	208147	334607	212130	113385	216380
m960	6.305	677.17	w/o MS2:Tricaffeoyl quinic acid; PlaSMA ID-1846	159258	23354	21462				9755	19110	7972										1779366	1282515	1289649	810017	1741940	675373	779206	352682	1669303				668736	1575453	1206903	2368606	770595	2059328	208147	334607	212130	113385	216380
m961	7.226	677.17	w/o MS2:Tricaffeoyl quinic acid; PlaSMA ID-1846	886146	618685	591675				1080599	866052	625440		83916	41632							792142	1177751	1155770	5634	52220	148458	1746450	1746399	1911326				23740	5796			254297	292216	39330		382315	458785	153103
m962	9.996	677.259	w/o MS2:C40H38O10; PlaSMA ID-1847	613974	479592	456606	127435			3073955	1756679	1836637	1722				124254	295097	174873	102156		134477	38659	41126		44229	105321	27280	150706	42216				33516	960	32577	93641	48139	35939	184977	534484	524221	599330	456137
m963	12.417	677.389	w/o MS2:Medicagenic acid base + O-HexA; PlaSMA ID-1853	201123	312703	207989	211424	115289	239526	3223862	2390257	2965017				191255	435543	105914	364579	574904	594095	1175083	431272	769307	298373		1556	1156584	879826	645191					151241		173778	371208	238005	1188710	751771	938683	545294	625851
m964	7.84	678.257	Unknown	17590	130640		578707	423498	607070	55290	26424	142413	589794	441702	262766	210691	307898	442070	768927	159464	317820		3121	2115	3585																			56915
m965	9.747	678.257	Unknown	63094	281233	505688	856475	291885	990124	518644	1063804	491388	797582	926945	1136474	1197588	1144332	804728	925418	832397	668142	1712	14222				38667			11413				1732		1164	1870	479589	1486	310913	10343	211808	344675	64252
m966	7.656	679.187	Unknown	1473582	32383	29478				27253												6526638	13212040	11621546	479756	836166	260268	1549866	1695074	2073371				289876		2167	15589	664154	778253	2077574	2157200	1980777	2747333	2072375
m967	9.878	679.778	Unknown	204850	32211		91738	78036	81231	539435	514684	523017							40196	39327	92587	52659	113183	97168	47879	69677	57693	267810	198029	195396				125988	122320	97449	298057	256236	275885	161235	172533	239298	173792	140400
m968	6.111	681.225	Unknown	171378																		1483468	746846	1554033	2205982	2420643	1944273	2000555	2350051	1537553				2277480	2220580	749472	2595741	968210	2853908	832834	1279061	1083145	788631	465426
m969	8.77	682.226	Unknown						8378	40635	34990	56688				16794	8577		3380		4817	413692	462335	481205	833658	952557	1253622	746722	1182716	630475				1226408	1024985	1264194	1201534	1032363	1205254		57790	184063	67259	84663
m970	15.556	682.372	Unknown																									2240218	3486196	1912183
m971	13.23	683.34	Unknown	107731	135954		765471	953941	940880	1570332	1052082	1991010	118902	132649		837197	645704	871924	2726733	1433908	1637044	289299	104588	156851		75319			65543	39776						38505	86807			410550	569306	347744	505965	460881
m972	5.625	687.197	w/o MS2:Flavone base + 3O, 2MeO, O-guaiacylglycerol-Hex; PlaSMA ID-1870	187695	1267		113422	297646	49036				247414	10381	133967	83167	225770	247978	58037	60332	67646	2055792	2304478	1887663	1298590	1226488	2451235	677429	4587474	2013902				1470435	1367227	1509692	1208811	5499432	1739799	199570	705472	470997	268642	515796
m973	4.905	687.199	Unknown	171767		357948	82285	133074	399049				425483	335506	353297		97947	517798	41418	614891	29019	1029730	2330857	3421340	852151	952670	2258972	1056935	1216880	4524136				1455502	1323811	1349703	2705631	1687026	1952807	692223	231225	717085	360436	110935
m974	5.207	687.201	w/o MS2:Unknown (carbon number 33); PlaSMA ID-1869	626952			186549	438740	183901				120584	149760	53316	29520	341872	95656	130356	188578	300456	2780829	1889603	3291314	3838302	3277114	2408061	3179070	1143341	1387441				4989517	4348818	3547615	1675787	4016000	5182152	499987	508233	334765	1370260	295998
m975	2.947	688.209	Unknown	3062330	2986550	2481833		1881		159132	66160	84869	180524	10928	270481			22569			95578	800504	1445198	1875131	619045	773123	883048	1204165	716412	322984				786950	484574	1949116	800122	813679	840822	485000	578260	794776	900135	783184
m976	7.641	689.285	Unknown		137967	72460	226879	349304	342854		87259	72686	58084	106351	225183	341933	119682	123298	116904	84056	302759	1066324	1170744	1055445	1220207	1180288	1269782	801238	1277277	1158480				1332769	1276023	1450319	1510329	1559601	1441443	447449	467222	541585	535769	460665
m977	9.51	689.286	Unknown	2556020	141116					2119	6217	2978										8210612	8560588	9441069	9992793	9985109	9797306	8066186	8987887	7428559				10622563	10273865	10696587	9416236	10415629	10316853	4542954	4000713	3971771	4292472	3881845
m978	5.684	691.169	Unknown	72195	12546	2909																1187564	885245	899279	651990	966537	485076	725055	1234300	1434805				1136750	1161673	1192774	1290707	187497	1302252	143465	73864	356253	21339	244361
m979	8.248	693.148	Unknown	1651367	2593368	2941996				412641	358856	486242	22083		7998							333950	234683	289630	335628	432969	394359	175686	261901	473017				336604	324873	404358	354574	237646	381336	363590	89579	168585	153448	126832
m980	4.854	693.172	Unknown	24324100	1573947	22691								14996								25758120	26259992	69334040	28627172	30546722	30005494	22286152	30664492	29579478	143372	20661	128727	27294798	29933010	33490034	33678788	27216442	35469260	19457018	14469179	13262492	13639070	13463678
m981	8.773	693.219	Unknown	2344143	3321532	3111498							73413												18330	2554	4667							4422	3614	16658	3298	3001	12741	171972	178271	131504	127903	155403
m982	9.976	693.295	Unknown	1649376	430678	214252	1550923	1742462	1548812	4395567	4109411	4642014		187532	220771	107723	186732	478628	2034264	2405278	2010129	3715629	4335856	3793666	974014	1278183	1111240	2969862	2801430	3442260				3385239	2808798	2985637	6341643	4401566	5414530	2667896	3400609	3559399	4020190	3589959
m983	5.773	694.179	Unknown	1058079					53474													4187523	13795489	3475548	16808706	20109004	10159760	12710711	13760935	15497745				20293084	16931508	18314072	4709981	5580751	18121986	5646074	3834678	1897880	2865944	5725101
m984	6.158	697.202	Unknown	30426	7579	89810											1339					979354	1643929	1313960	85399	113738	31566	242026	647948	551322				87306		314845	26880	119689	330855			113641	160611	298110
m985	9.976	698.305	Unknown	389609	146214	64999	279984	121643	434118	1702200	1847792	1102551				64789			130503	782079	511561	1949353	1768756	2049493	809720	262251	235174	2348203	2014572	1603506				1220270	971077	1386208	2306894	5136836	2897250	1963330	1707368	1573617	1604110	1222398
m986	5.657	699.242	Unknown	40713																		1869846	525865	255161	1875011	1237509	1853254	2205280	2496179	1445417				1580926	2363087	1858531	2314840	1101623	3421220	313957	143144	1431666	467056	330412
m987	5.821	699.243	Unknown	107940																		1285667	586276	285180	959691	1526248	1963222	2081484	2160408	1504069				1825341	2380453	3116867	2314840	1361688	3089680	976570	378186	879149	745494	330412
m988	9.78	699.268	Unknown	275176		79080					65196											722011	470137	707924				4180								20979	1067	5629			83596
m989	12.65	699.381	Unknown	60198			9870			919960	499042	1221335																2310692	2734070	1788668										83545			66523
m990	5.087	700.173	Unknown			85730		15198	184345				36422	10583	79072	7323	13740	70058		35158		368420	350713	148443	321858	1239652	1524541	852741	966264	1489289				1114449	1367680	1201339	985459	920644	1203757	55312	35367	48811	308817	219801
m991	9.54	700.282	Unknown	313111	29771		68293	55285	69604	1332478	1300717	1739638				28262			222535	81107	80438	511836	83460	166093		121405	63106	7371	150726	317818				15153	21042	13726	208511	5204	161052	298785	590290	390752	555778	555425
m992	9.154	700.286	Unknown	13586			464639	350011	484294	185791	136787	209199				67465			832652	585051	504759	43059	63355	2196		2089	5732		2699	3250				59525	97780	81482	785539	57360	253118	46042	81734	78086	45501	119795
m993	3.839	700.671	Unknown																			17017	299053	18549	282341	388666	109919	139015	140501	470006				554126	427708	113885	1133331	387209	747582	23000	65821	16842
m994	9.886	701.292	Unknown	499577	73512	16734	15898	38234	12673	366878	400148	385569						23594	60355	21965	61436	2898094	2264718	2371298	1247198	2611527	2401851	2593377	2749250	2750404				1724537	1471936	1668167	3930177	2630978	3038157	1850417	2849770	2374868	2952562	2624120
m995	3.419	702.189	Unknown	211560												1993						347555	965224	388988	244240	2611588	513275	692018	308803	414987				705825	499068	971046	576380	452526	512182	35167	98640	20657		19498
m996	5.19	702.19	Unknown	62537	73365																	810698	513377	671014	839039	1527887	1940371	1084582	1124168	1781148				1512317	1033070	1623575	1392761	794427	2189641	246130	59540		217156	249195
m997	5.954	703.153	Unknown	19333386	21321902	22589700	233485	357474	284583	6437994	6118066	6162132	6299463	6085445	6150330	340321	317444	367185	603854	562219	577005	6791073	7116138	5934510	966166	920474	1044567	8453133	8633405	8373444	126251	58098		1168319	1085882	1112780	3003448	3246795	3333923	5373200	5258792	5493664	5791335	4991924
m998	6.144	705.168	Unknown	18088368	15209613	16409376	89155	200253	59966	3858906	4089996	3443611	7144382	4634950	6100473					453098	69011	14312369	12305684	11207548	574893	1243371	1728564	19806636	22286156	19189606	1273			2036658	1459259	1705104	5563385	4722806	5609700	4992828	5296171	5164533	6640729	5995005
m999	7.337	705.169	Unknown	6420703	6523546	3495230	18500	90027		1276172	1980463	1980208	2436876	2757300	2169115				28055		76248	3907001	3644664	2769749	130733	526660	705011	5826482	6524059	5629825				804929	862494	759254	1840686	1710895	2157138	1994580	2459484	2044897	2682671	2172502
m1000	6.205	705.175	Unknown	14354388	12161646	12186411	80767	153098	51982	3124805	3223650	2633815	7144382	4634950	6100472					351799	52239	12064892	10342009	9401349	480069	1049361	1148148	16487041	18719498	16146257	2051			1388618	1129566	1423740	4318832	4003608	4664240	4089410	4565650	4452412	5351022	4911051
m1001	4.837	705.216	Unknown			66821	250512	324358	273622				324415	344422	305622	301236	301607	483198	284688	324060	72290	93106			10641				92893					10473	9777	42891		141671	21267
m1002	14.746	705.423	w/o MS2:C38H60O9; PlaSMA ID-1904		124078					842344	697027	791777										319997	714355	773774				77014	120392											354199	332157	114367	274717
m1003	9.059	706.307	Unknown	1293756	220148	68760		9221			52140									55252	19804	86728	26109	195417	85119	131788	23164	708183	1043116	933470				439388	552705	384740	52444	126063	82858	355279	396379	458364	546675	296686
m1004	9.937	706.308	Unknown	601322	148909	50594															9193	285004	343685	580224	765203	325708	551995	860325	769208	597411				213835	342296	330576	585569	1684888	1247401	1134290	818740	776951	443840	512183
m1005	5.821	707.165	Unknown	1081263	727625	675087				50040	31176	40131	440345	470042	343501							8489865	8348245	5221186	7900604	7310235	7783250	9867309	9868513	10656819				9308082	7141790	12355056	10035470	9235110	13265526	3117594	3443448	3521476	3591316	3875233
m1006	6.059	707.174	Unknown	4724004	3348618	3529439				237363	92949	215304	1982926	2004931	1496656							2101372	1570998	1187052	997755	1219006	1441780	3789544	2332973	4184484				1776099	3370414	1701263	1993775	1634411	1892120	3117594	1840547	740396	1699606	926882
m1007	2.78	707.182	Unknown	20905290	26025644	17874378				474066	816450	217052	96009									3384733	5456838	5053701	808976	499130	419100	6354204	7314052	8209891				341445	321813	391426	632696	1181354	902937	1257578	1179446	1836858	1787052	1113032
m1008	5.318	707.183	Unknown	11448187	9882703	12641645		533		221372	382615	266586	83038	158680	157698							3818540	5024292	3404514	915420	1339070	1327283	6405700	3484785	6054684			54608	922638	2796578	1235225	4090870	1337488	3524802	898782	1165695	3319124	1703253	1776360
m1009	9.329	707.255	w/o MS2:Unknown (carbon number 35); PlaSMA ID-1907	1106006		22226																5086573	5039406	4960706	2968788	6497262	6118017	3909458	5139248	5803658				5102244	5176426	4987875	5988308	3968358	6471837	1310818	1544793	1934319	1518938	1388225
m1010	9.734	708.326	Unknown	1205299	1870184	1696776				7021	11043	4329		12685					10325			586912	652120	537088		718		46951	3110	16259					1929			10084			58915	27338	2024	1799
m1011	5.835	709.183	w/o MS2:Unknown (carbon number 35); PlaSMA ID-1910	1720244	428924	485383							41475	153876	103100							1502076	332562	271153	1829769	1622575	1416961	338316	718682	742902				1789636	1569045	2088515	1367190	615779	663572	59522	832893	142538	505881	760815
m1012	9.33	709.252	Unknown																			1257958	1678646	1310166	1178950	1487520	1548342	1190381	1130294	1304924				1694391	1384802	1658179	1855313	746337	1943077	144475	236820	212162	196338	218632
m1013	11.456	710.338	Unknown	365650	935504	969461																																		56490
m1014	3.271	711.214	w/o MS2:Tetrasaccharides (Hex-Hex-Hex-Hex); PlaSMA ID-1917	2421242	508																943	3881337	6105392	3759587	2191216	3920136	4166804	531304	6281970	4144244				6755736	4292030	4503746	2027032	2111064	4340117	1343027	2031974	286248	2175253	2553775
m1015	5.8	711.214	w/o MS2:Tetrasaccharides (Hex-Hex-Hex-Hex); PlaSMA ID-1917	1400885	53254														379			5907960	6484303	5220992	1367162	3343756	6411880	2590964	2051353	3762184				6490166	6675103	6088602	7737476	5084125	6566162	484252	1185773	2356574	2132204	1703387
m1016	14.746	711.338	Unknown							565988	435813	479941										144174	355885	257693				70439		45490										66860	76570	98160		133691
m1017	5.609	713.213	w/o MS2:Unknown (carbon number 30); PlaSMA ID-1921	3675373																		12645188	9320770	9668863	11829285	11601817	11723971	12745912	12191961	14019014	55867	1197		14661325	14420163	12968949	12376495	13528876	13617302	3464258	4594169	3449981	4112096	2691210
m1018	5.689	714.217	Unknown	171846						50982												2119145	1448529	2200292	2630976	2324456	4310773	2599154	3731958	2317564				2747613	2741819	3044737	3269865	2799640	3918031	509704	969961	844349	562056	980127
m1019	7.656	715.163	Unknown	28588	1826					11043	9676			8368								660880	1535075	902262	106128	149660	58626	17360	95351	331141				311521	219532	87273	37019	32350	82570	158380	180449	119623	163281	134655
m1020	5.958	715.222	Unknown	136165		28439							58988	34327	74902							266091	1531948	545598	1065409	861923	1527663	137208	529240	392969		38247		1706828	181207	1223682	1657504	1183877	1593256	3973		67465	22959	138374
m1021	7.472	716.222	Unknown	653008	1306096	1006904			13177	273125	65035	113170		3600	6499													33993	71955	32508				50863			25625	30490	8615			17664
m1022	9.611	716.312	Unknown	1077280	132353	84686	765138	303265	252898	1616383	1322399	1097272			85109		62432		357389	790457	383800	1394895	1865132	1652621	1111070	887189	716320	3635562	4103899	3168803				2509825	1974824	2060826	5206234	5360032	4565253	1498143	2195138	2198274	1590025	1554314
m1023	7.037	717.214	Unknown	479110	47414					163270	360346	295175		3457					1803	56584		23195	28549	11787	72654	527	118477	843537	1079827	936964					93393	5881	311698	237521	274846	1405	91943	96587	159640	65175
m1024	6.711	717.246	Unknown	397985	110					4441	5064	6096		65410						3126		696307	572583	576596	115064		4018	411735	95589	431068				2296		63148	10115	19842	246722	101118	101286	88751	222591
m1025	13.118	717.364	Unknown							1948454	1149533	1999408													2080			2502112	4690010	3383824										18164		1851
m1026	5.599	718.175	Unknown	292518	334																	843158	652842	348464	549955	1427857	1469742	703650	1101632	1126099				933284	1194566	1390029	1275359	718713	1514937			169827	202372	262784
m1027	5.124	719.183	Unknown	931474	2639784	1971218				59136	160717		110844									261706	856807	413336		115239	141147	985961	901842	1149435				11437	1098	17483	64677	18860	77213	210713	104938	513484	218326	150647
m1028	7.118	719.234	Unknown									53808										30634						319428	353052	531815								103753	75680
m1029	9.882	719.277	w/o MS2:Unknown (carbon number 32); PlaSMA ID-1926	232788				27855	1009	70008	38251	11657	968					1109				269561	426763	175425	46482	257029	222801	276452	455650	604598				46896	206599	60864	601404	131926	300764	135432	279611	460902	417628	474782
m1030	11.062	719.347	w/o MS2:C38H56O13; PlaSMA ID-1929																			645640	342431	738594										59746
m1031	6.364	721.216	w/o MS2:Icariin		415	4418																56639	450300	127443	276896	118069	34556	204215	320620	247259				223885	202227	404332	255977	377398	762050	1652	1548	125323	70198	109526
m1032	11.388	721.366	w/o MS2:DGMG 18:3; PlaSMA ID-1935																			4788822	4442722	4052883																194522	453101	424410	102440	435830
m1033	5.297	723.174	Unknown (carbon number 32); PlaSMA ID-1943	642949	601885	688239																457374	1245731	813954	7817		25913	1956031	2524462	869046					4967	15614	71068			36786	202232	122595	179776	138057
m1034	9.244	723.306	Unknown	13015390	1588805	519614	355816	310083	330879	18098334	16858670	17828274				1544286	955738	994630	436080	383819	532978	2626625	2503770	1851957	4066558	8861813	6589042	23686054	32988382	32804432	47070		57310	3157362	2313546	2264330	6403644	5166684	6759661	6371277	8026748	8614335	8997975	8126856
m1035	2.505	725.174	w/o MS2:Unknown (carbon number 32); PlaSMA ID-1949	18477302	2439315	39449																52803988	51747832	51580096	64395364	69091800	69015880	62625388	68531600	67405240	221158	160996	180662	73873736	72076320	74831400	77748952	70505032	76029328	20400648	21762206	27672800	22067196	8124784
m1036	2.446	725.176	Unknown (carbon number 32); PlaSMA ID-1949	20081922	2511996	14257																50074368	50764400	49896208	64310488	67567512	67005916	61002444	63591104	68158648	297620	206315	214400	70806024	68679616	72095984	74486888	65892976	21588392	25461824	26639862	27672800	27105252	27043142
m1037	8.396	725.209	w/o MS2:Coumarin base + 1O, 1MeO, O-(C26H31O12); PlaSMA ID-1952	1204422	1250562	1316991		79374	62728	1902420	1836576	1878368	159596						145560	87585	115673	206397	504603	235420		247811		1895040	1522062	1952361				93176		33834	101187	538667	417568	414799	453699	610061	637064	432485
m1038	10.092	725.268	Unknown	2420048	96970																	8052272	8495449	6854993	7664869	11454145	12141434	8417362	9231359	9973105	65494			12632072	11370511	10676308	12014828	8323609	11532174	2329016	2853958	2770899	3403720	3040904
m1039	10.026	726.269	Unknown	441421						4202	4480	4836										1921194	2295012	2085285	2318255	2959188	3353546	2574230	2319727	2211718				2990778	3233840	2855799	3607022	2105376	3089400	768176	773723	832997	1142785	1025312
m1040	2.947	727.17	Unknown	615367							4290											1139864	667492	1133254	1064549	1778567	1479268	1203973	638360	792261				1316899	2046740	2434216	1616495	1556828	1590206	277934	319320	807999	295156	686448
m1041	10.064	727.258	w/o MS2:Unknown (carbon number 40); PlaSMA ID-1954	940380							557											1760690	3162486	2710333	2925215	4331193	4697542	2557988	3116610	3568862				4624426	4497830	4588979	4976437	2896788	3814786	1075287	949030	878622	1430235	1030791
m1042	9.989	728.266	Unknown	264640																		563094	782406	501793	776758	1078492	1087076	633050	826452	816364				1386918	1237131	779321	947386	1066633	1467509		107171	217011	238336	149442
m1043	9.245	728.317	Unknown	2629084	469431		77745		69854	4010803	4545271	3273230				125768	341609	150960		112911	75900	743839	632573	599318	3710878	1996826	1419198	13545820	11119919	8422810				657887	591814	831399	1680133	3821042	2656211	3479954	2163598	2117318	1862677	1646255
m1044	5.76	730.196	Unknown	226559					3487													139318	25936	222588	567099	149176	110804	330315	433537	432521				827004	695940	697763	657491	289570	444933		19902	41603	139901	110236
m1045	8.536	730.29	Unknown	536952	4425				26358	2794296	2178066	3724363				489773	323751	515588	78814	128776	220921				76279	293601	171976	751755	485788	555635						27318	385463		19372	239507	396826	285412	253617	379565
m1046	7.397	731.263	w/o MS2:Secoisolariciresinol diglucoside	2389226	1373266																	3761995	3514716	2713314	168056	51351	106765	1083062	1340549	989898						44619	402890	252734	475909	726990	858832	357586	419477	445528
m1047	5.789	733.203	Unknown	431332	54789																	1460304	2028719	1116312	1485510	2550209	2433811	2022818	1941370	2003204				2114576	2630072	3034386	2001858	2620672	2684813	147359	628058	305445	760081	594894
m1048	9.939	733.302	Unknown				115808	140160	53711	123172	33665	93428							61974	149072	42802	834890	711108	706005	39076		6660	176772	168497	41666				100037	33878	25025	229957	357036	710200	345447	53740	101741	145668	19328
m1049	13.987	733.415	Unknown	5030766	7314036	7350291				4691020	3494219	4820860	533078	789873	258914		126750	83728	68198	236317	276184	14544971	19455854	21351170						66021										2346101	2896441	2703140	2694326	1969283
m1050	11.672	734.299	Unknown																			756519	1002455	1041474
m1051	10.452	737.356	Unknown																			2757911	2520840	3730072						14540										137171				130878
m1052	5.476	739.184	w/o MS2:Kaempferol-3-O-robinoside-7-O-rhamnoside	314458		8688																1709968	1482907	998126	1726612	560778	2216713	1758193	1369546	1424969				1889022	2006786	1540826	2339650	1558840	2169609	339845	253555	560438	374831	106925
m1053	5.357	739.189	Kaempferol-3-O-robinoside-7-O-rhamnoside	244571		1452																559887	1263404	907712	603442	1911407	431374	1807064	1091458	1287161				1839987	364165	1187287	2263275	419568	509401	257171	192793	170011	193702	44854
m1054	6.065	741.248	w/o MS2:Eleutheroside E	77143																	15397	1738468	1494719	1641378	1864451	1347211	1469428	1427305	1459901	1511648				1715680	1737210	2066825	1669507	1625759	1932844	282474	804792	383708	460459	328827
m1055	9.247	741.292	w/o MS2:Eleutheroside E; PlaSMA ID-1973	7613089	656647	298444	576593	530748	534934	13345297	12157666	12359712	114601	11797		1227576	868632	1189041	633660	431602	442440	1480078	2367864	1704292	2115771	5942552	5006484	12370325	17336652	20025582			6049	3826305	1239836	952220	3333198	2032918	5232162	4146432	6411242	7610614	7377906	6921065
m1056	8.916	741.293	w/o MS2:Eleutheroside E; PlaSMA ID-1973	995073	104256	33806	2604714	3185125	3205076	2943084	2466275	2879168	58491	118242		487103	341367	541582	4168118	2568499	3029778	472971	351976	240568	278391	888673	653172	1359202	1935082	2228996			68129	990741	3279922	3261323	10850624	874270	1863047	711212	1239925	1407023	1301055	1344759
m1057	5.31	742.209	w/o MS2:Cyanidin-3-O-sambubioside-5-O-glucoside; PlaSMA ID-1974	724615																		1781943	1700526	2217435	3723953	4718799	3393380	3085896	3507514	3559791				4609989	4369794	3791220	4963740	4540158	3727906	471989	792295	723947	667279	646854
m1058	9.236	742.296	Unknown	7433021	712655	202734	996629	1243438	1222599	11537272	11344598	12065026	134513	114905		1148629	1005698	1593885	1680094	932565	847755	2611911	2495284	1915205	1937205	5693922	5271050	8820096	12560852	13606631				4700854	6425210	5233038	16495225	4922875	8114835	3756060	6248830	8207846	7485626	6994052
m1059	6.467	743.165	Unknown	338788	4585	22977				47517		1244			1590							2442932	1112289	1153722	274856	303065	272269	686398	958469	870664				878083	291606	284793	351893	291036	339029	104535	29419	113494	82803	45166
m1060	6.055	743.187	Unknown	1068934													11689					3485857	2763250	3275428	2656347	727124	3579073	2917284	3832170	3721100				3792114	4411355	4008441	546144	3220916	3238581	1099470	236084	1161450	989842	1056702
m1061	6.189	743.187	Unknown	972728													6907					3053790	3126708	2968071	2942435	4014158	731271	2846629	3693296	1337097				1506978	968669	1048393	4328148	3319943	3785289	355435	1107311	392251	1086925	1130541
m1062	7.309	747.139	Unknown	1329584	1242641	1088922				55932										41889
m1063	7.086	747.26	w/o MS2:Unknown (carbon number 33); PlaSMA ID-1976																			1519674	1375466	1491532				214609	160392	37362						373
m1064	9.23	747.313	w/o MS2:Unknown (carbon number 33); PlaSMA ID-1976				234848	173158	402592	29035	43761	126965				6389	9013	3000	648804	312992	226335	431380	210075	133914			200667	101626	60002	114271				850981	1106886	1611066	3463480	1731972	1803480	659668	693168	591026	157558	438328
m1065	13.629	747.399	Unknown		45626	6107																4109215	8924223	9678705																69630	138044	115147		108159
m1066	5.573	749.175	Unknown	2457	3989	4514							1044	1308								1392769	2148674	1779273	15798	62100	163087		21208	23721				2850		9253	2298		83688		93150		41921
m1067	6.944	749.187	Unknown	3195413	3363714	3949576							926954	836234	646632				12653				3938	19848	195	20934	27459	24104	1363	33931				4228	11901	9731	72330	50477	14092	8605	186232	13246	31463	75655
m1068	6.903	751.189	Unknown	1144898	1266910	1274021							218415	120447	111403				4245					25783		63471				9600					6074		31212	8567	2548		44823		2105
m1069	14.742	751.428	Unknown	289016	325739					1040228	1497821	1370731			69144		152496			120499	33244	2415363	3129199	3654223	183134	192581	157576	593257	1044202	1030211							217002	328649	168364	1027846	991752	643541	539829	919061
m1070	5.364	753.219	w/o MS2:Flavonol base + 3O, O-Hex, O-Hex+C6H9O4; PlaSMA ID-1986																			1421390	292931	630158	355411	1622791	1493783	1062714	1401529	2104565			1038	1156468	2008596	486062	1213724	1377038	1261322	104547	75902	206105	45934	237087
m1071	5.674	754.211	Unknown	5061																		152563	154678	180784	629452	1158800	1246401	804360	84432	393764				1337864	800355	1563004	1287137	1230418	293658	1884	21929		63852	137189
m1072	5.756	755.222	Cyanidin 3-(2G-glucosylrutinoside)		3710																	1553483	1051483	1641611	1750305	375502	1294462	552988	1303184	587843				321074	2408922	1841973	1517783	1008956	2206556	317745	15344	247252	289016	14609
m1073	10.267	755.373	Unknown																			2269169	2711195	2972287									57962											36285
m1074	9.832	757.241	Unknown	419784																		1294434	1018160	1062194	1530847	1489207	1806556	1504589	1481985	1365440				2048340	1853206	1539696	1760094	1687134	1979129	446968	435612	819633	697348	505253
m1075	9.232	757.304	Unknown	1354628	233208	134334	1815	69168		2891846	3017108	3270167		24590		219760	194102	294676	158378	95184		1596418	1438138	1847441	369667	826986	800356	3150347	4796538	5722254				243326	211160	161530	699304	350074	252748	928006	1267031	1801114	1554353	1184246
m1076	6.123	758.205	Unknown	35825		9562							8239	403								731972	204249	864162	1018611	1691976	2027376	530884	1063551	479344				984871	1295696	1464959	516024	1707107	668220	87475		103393	42405	31283
m1077	4.843	759.185	Unknown	171846																		2207024	1871597	2125766	2344057	2818894	3111431	3215731	2860788	2979770				2715643	2158273	3090463	4632570	829936	3386557	219628	51118	184195	97295	787066
m1078	9.699	759.313	Unknown	149386			76754			323833	395366	279487							1077	133893	75990	342663	455590	571632	252546	73946	204280	480062	615262	679411				285861	239985	158322	881371	588181	734103	302324	337113	557492	539287	528782
m1079	5.452	761.197	Unknown	2729272	186122																	11539729	9378880	8651793	11976041	11945267	14343119	11195647	16038249	22476216				23387534	15590548	17951722	20588636	10926913	18369780	3720100	3263209	3682049	3571826	3321899
m1080	9.251	763.32	w/o MS2:Unknown (carbon number 36); PlaSMA ID-2000	449228		95084	57406		898	2157268	1719849	1587290						41001			9778	366816	210984	273184	168675	185630	153860	482366	426144	691748				67572		130509	190756	543987	371303	415729	617455	645376	609412	414192
m1081	13.023	763.429	Unsettled: DIGITOXIN	171165	109737		84829		139758	7311208	5465903	8747309				94839	162099	460100	203464	114832	160765	27634056	52445120	50335592	511449	594085	433990	11918802	14020237	9741719				242498	108732	89270	511604	391415	702207	1805087	1729588	1379952	1620796	1401667
m1082	6.085	767.229	Unknown	222458	108443	1689	14522			10852												1464142	1705147	1630406	1610150	1791453	1745441	1477186	1176527	1453470				2015009	1518486	1946818	1834966	1628484	1836150	375699	312668	194690	477762	678537
m1083	13.16	769.393	w/o MS2:C39H62O15; PlaSMA ID-2015	102686	121368	58075				1438391	893597	1614585										260970	261848	120557																59234	431695	274903	390147	268854
m1084	14.005	769.393	w/o MS2:C39H62O15; PlaSMA ID-2015	1033778	1195946	1609202				1131152	568140	1192042	186496							107261		2236430	3065404	2638431																248465	455258	603921	550723	452473
m1085	9.188	771.368	Unknown																			3938538	3796826	4225212				176801	184328	240687									18949	112485	140460	23117	284910	142865
m1086	6.223	773.235	Unknown	123092	6098	5186																2264363	2786897	2111817	2306948	2883438	2535387	2317729	2256985	2121622				707552	2651426	2526356	1011154	2353304	2642711	751958	409984	881280	769242	264852
m1087	9.427	773.38	Unknown															3415				5221662	5350378	5520374					53066	3588										65937	246282	399518	308786	137570
m1088	9.613	774.317	Unknown	998353	86065		1296057	1139786	967729	1848991	2081790	1596460	131850	229893	193580	59998	78825	172007	1155341	1944286	1423795	2010008	2062355	2273703	343217	862249	863703	2547933	2658334	2558463				2527672	2494170	1900046	5233714	4031645	5136400	1680229	2490684	2751656	2842437	2499863
m1089	9.72	775.314	Unknown	539743	76731		596597	809909	544257	1196012	1375279	999786	58434			134739	64664	126602	879736	1217474	676950	2050940	2493196	2142242	339273	412331	275294	1402526	1406656	1414079				1268574	1177366	1354529	3167008	2809439	3415760	1239711	1789558	1883932	1847502	1830287
m1090	9.842	776.313	Unknown	33607				31420	30945	47465	61709	53607						16401	40190	33909	51516	817510	1363608	1266292	26222			110504	96778	90571		4379		47763	94755	50104	247115	131955	90028	163984	163318	118645	211674	63404
m1091	4.755	777.21	Unknown	1581879		25304		17316														3418932	3892456	3583280	3377080	3731662	4584324	3427651	4718620	4629662				5556410	5078184	4612724	5403870	3411385	5535730	1102039	1470700	1252445	908965	1596263
m1092	12.793	777.406	Unknown	642018	525774	209559	2097543	2755700	3295204	20486518	14909650	19165862				4843896	5806972	4386510	1190894	3726256	4423490	19236	59626	35323	455277	506537	777995	2700414	2993946	2565306				361318	706178	800575	3213406	1475641	1377766	3730396	3040896	2432457	2366368	2586629
m1093	4.724	779.204	Unknown	410490																		674208	1027826	905561	893305	1291693	920087	1078726	1431998	1161619				1267206	845452	1302991	1326486	837798	1328631	381753	315267	303352	354118	441219
m1094	9.603	779.336	Unknown	195093			143821	105265	129268	407888	465438	386550					45684		124055	375837	322572	812611	904630	909511	469163	137972	133078	1662124	1334835	1009120				834520	522727	1035620	1595455	3260653	2014918	1178356	1006515	1027213	528989	412115
m1095	12.907	779.422	Saikosaponin a	1531076	216761	250598	909631	1246812	1312195	10558409	6828296	10165473				1721828	1512973	1608812	1926002	1151182	1236193	871904	157811	259454	1330564	2102559	3150106	5016665	6778888	4732590				1397752	3506100	2352873	11128280	3919692	5668869	1423799	1440267	1599447	1557726	1532344
m1096	11.922	779.422	w/o MS2:Saikosaponin a	93739	11306		99972	436178	527449	2731017	1844927	2851071				787960	401028	790567	346859	258259	118254	93065	2571	175027	226417	273504	341205	599814	1076030	661965				431225	517390	271684	1793649	313819	873024	780063	675584	695066	780595	675594
m1097	8.865	781.249	w/o MS2:C34H40O18; PlaSMA ID-2028							387921	339256	364994								62660			212631	257230				525627	544377	574072							297571	120039	305282	64440	94436	87669	85796	90497
m1098	9.181	781.304	Unknown	345073	72023		452438	1954	319335	2523628	2317859	2956709					56447	133587	825143	570579	544260	162468	358924	140833	59953	159058	159001	522270	576530	625614				98848	40938	193266	799450	297169	398535	667622	1040588	753532	967511	863422
m1099	5.781	785.233	Unknown	288617					950					1152					5217		942	1906986	2501826	2875618	2427586	2838646	1245600	2337152	3782505	2682864				2180811	3901155	2903082	4073586	3790371	3012725	1170344	872429	483095	497868	489478
m1100	5.55	785.246	Unknown	333483					4981				1311	5478					13106	1412	5125	2705266	778499	429781	1547581	2845004	890445	1349232	1971436	772329				1811030	1008032	1788048	966253	1902350	1764240	1501959	563206	1367347	1201806	1574521
m1101	13.746	785.421	Unknown								6597	20035										961188	229041	272758
m1102	5.635	786.241	Unknown																			257902	607451	491306	818486	423954	1156016	221665	824893	881569				921447	321184	295109	956643	905754	748148	501	45501	9089	35712	68121
m1103	9.03	786.336	Unknown	497402	86871				51076	67986	101902	120458								7507		120409	209736	116511	145310			735482	723517	522870				470705	308249	207978		130310	118486	454770	167144	310094	65443
m1104	6.151	787.214	Unknown	1682799	2095776	2083233							106105	155077	406819							233718	271828	244884	192172	620950	197541	154653	383793	176242				429452	106175	221309	1175222	312028	132542		290376	18214	191099	32543
m1105	9.227	787.287	w/o MS2:Eleutheroside E	770532						4380												5610456	5285072	5971910	5073810	6344574	5577498	4721245	5370860	4916837				6441706	6038472	6050804	6337108	5890016	6470818	1482390	2145678	1904467	1829300	1829508
m1106	7.378	787.289	w/o MS2:Eleutheroside E	400652												4660						2246264	2061725	2235450	1964074	2435369	2754514	2110855	2392652	2210005				3023942	2444262	3623367	2962493	2542334	2946984	939949	1041374	1098134	1109117	1140872
m1107	11.531	787.443	Unknown	45702						400573	407771	314509																842084	688366	967806												43912		75198
m1108	5.643	789.232	w/o MS2:C38H46O18; PlaSMA ID-2039	805539	5083	6668																3387610	4021065	3370406	733581	837023	6232946	3354459	1291114	4220594				4197359	4362269	4371393	5488984	4846245	4445924	423183	1230591	1195446	1675825	1226257
m1109	5.771	789.232	w/o MS2:C38H46O18; PlaSMA ID-2039	1289130	13751	15891																3169569	2098048	493532	4261309	4640627	1272127	3262980	4621120	4258952				3893369	2578491	4371394	892856	1429119	4513148	1689733	1909529	1798271	997652	1297295
m1110	7.645	791.201	Unknown	882434	973266	713296				297				348727	118341							244977	58722	13160				20013	220573	71275			15844						1056		41951		5407
m1111	5.698	791.247	Unknown	3916648	151948																	16955366	16202906	17191162	20804480	15741267	17242354	17081216	18993410	20292178	44202		12439	27569902	22685644	22506062	26769966	23396080	27389542	5407208	5642251	7049140	4683458	4845557
m1112	5.776	791.248	Unknown	3981183	151948																	16198074	16202906	15431707	17263854	25160812	17242354	17081216	18240732	20636118	45629		12439	22483362	22685644	24899286	18733756	21718734	22379300	5858332	5505330	6372548	5154797	5187518
m1113	12.605	791.425	Unknown							688579	752497	885377				9742	63616	206042	26438	154405	193726	857522	2100841	2259034				218823	247803	260922											101859		128988
m1114	10.841	791.426	Unknown	325859	163274	316238	1337169	1309550	1350680	3406553	2247890	3010290	20706	26498	92664	595026	785755	1057334	2623945	2431206	1898419	475619	406934	309163		62665											72794			600027	874492	808608	1071174	403424
m1115	13.99	791.426	Unknown									35493					360					3319352	8118815	11322368
m1116	6.177	793.259	Unknown	204101																		1231747	3263024	3323260	3922038	585826	4070198	3932570	3899680	3900457				4215520	4352388	4194578	1424942	4745716	4178337	344859	309552	371094	865191	1015312
m1117	6.345	793.259	Unknown	162619																		1074824	3273747	1083447	4093240	1765984	4074461	2026196	4586404	3969006				4520290	4375660	4149102	4538119	2752382	3982286	269271	268166	544989	207900	274740
m1118	12.807	793.437	Oleanolic acid base + O-HexA-Hex; PlaSMA ID-2042	1709764	2178687	1253072	851116	858811	956695	25941798	20369190	27913154	426790	172930	204062	1469774	1508991	1874377	1574653	1735110	1956485	262055104	452942112	511722432	341682	223429	299931	5104184	5475853	4650190		138453	68334		39358		133151	242040	74964	21537938	22283038	20812726	19623072	25087776
m1119	10.992	793.438	w/o MS2:Oleanolic acid base + O-HexA-Hex; PlaSMA ID-2042	36743672	16863366	18805004	20531806	14231781	17547946	129072480	117756216	118284008	3388462	1982312	2470792	11997655	10907989	16565557	30099630	39827144	29964338	32346688	33728120	54382288	5402866	4528648	5325813	20105856	21483660	15381262			48337	1340306	1910136	1863042	7508370	10930565	6179218	48532132	51331332	51977408	57320724	47912536
m1120	7.552	795.201	Unknown	304821	1484																	1582870	3926272	2867548	110487	10941		412193	243269	450149					64626			117342		274128	471664	473768	360523	337585
m1121	4.784	796.267	Unknown	341493																																				775288	755228	893854	716634	744852
m1122	6.005	797.235	Unknown	15445																		918799	1370849	1297463	845373	391878	867925	842957	626094	1105707				550429	555048	609888	579735	421141	534502	143052	325558	629234	78248	331705
m1123	6.194	797.239	Unknown	51387																5270		913128	1216804	1043997	1476050	430535	1154335	1617642	1536460	1565119				1507707	727187	1364021	1496824	1438999	1325532	385256	77047	157750	244293	446566
m1124	4.841	797.243	Unknown	18706																		2038745	1990166	2105972	2177			42999		66033								8767	8737		7036	7092	1413	11832
m1125	9.208	797.323	Unknown							380490	450142	496874										1388846	1136330	1271543			80397	17030	111972	2782										220094	99470	180661	101603	386073
m1126	11.49	797.47	Unknown	27955		1307	1002	950		54419	33007	30406				363			2178	1564	511	1148						729800	525608	476239										2387	6180	1000	2081	2132
m1127	5.367	799.206	w/o MS2:Flavone base + 3O, 1MeO, C-Hex-FeruloylHex; PlaSMA ID-2049																			741726	659763	172632	437965	1548094	1396960	991572	181688	601881				1129030	1323158	1494139	1094609	1301469	1000968	11422	168705	93420	389779
m1128	13.015	799.399	Unknown				107879	237154	248570	2065247	1519994	2891917				62829		59296	273284	267482	444900	5668536	10499696	9956234		129474	122852	2390610	3094746	2797916				72490	83007	59301	466389		118898	355752	382942	374840	396777	691585
m1129	5.475	800.213	Unknown	78714	6381																	961835	891562	957087	1442902	2046899	1904239	1716858	1869649	2002199				2066784	2669253	1680369	2533544	2084947	2363664	383596	83790	238472		649800
m1130	5.695	801.224	Unknown	6717																		572409	878978	272801	1096186	1007838	1099514	1004543	1151674	268704				347446	1224593	724401	1137533	1139051	1435103	66308	6750	9825	67752	209034
m1131	5.153	803.21	w/o MS2:Unknown (carbon number 34); PlaSMA ID-2053	48547									514									1445500	1487325	786129	1022239	2939609	2055515	1917676	2260747	2254346				1167919	2347670	2800661	3664878	2743180	2953328	185241	765571	325929	625595	619126
m1132	9.127	804.332	Unknown	445102	90822		42515			814230	1308714	1276131					72292					8404	134037	67614	80222	222948	157467	1510147	1085611	1388160				49184			149410	215234	110745	265201	485529	283008	478672	242755
m1133	9.713	805.3	Unknown	2776681	165003					941	1586	584				1034						12320189	14362289	12927330	14202638	15184054	16527429	14144719	15535970	12641893				18463934	16242802	16591545	17136466	16866642	16280828	4636292	5033694	5367804	5217740	4604860
m1134	7.732	805.301	Unknown			10569									1382				6103		1521	1005189	1265511	1156943	1093108	1387358	1159547	1234299	1099761	1145110				1264064	1290670	1356194	1199222	1205020	1399120	155384	82125	102815	104406	323627
m1135	2.531	807.241	Unknown	7060262	133617																	12007362	15853046	9182345	20623718	19875212	20402642	18129654	15192892	6118586	15459	61761		28815452	23443666	23108664	18255896	14213622	22993822	1948862	7427045	5655793	2142892	6714324
m1136	2.688	807.242	Unknown	1919282	97181																	4830536	12032079	4918744	16211480	19539450	22010934	14276038	21245826	5668672	27889	17373		24858306	20417924	25130362	19008734	24325770	17279236	1942678	8532746	7350150	1893955	7346532
m1137	9.891	807.415	w/o MS2:Oleanane -2H, +1O, 1COOH, O-HexA-HexA; PlaSMA ID-2055	176458		204396	1654582	1549672	2152658	3832759	1855904	2333822		202468	135633	1435958	1295587	1555993	4177600	3082381	4514472	488672	333790	407349			90342	56942	93620	58030	30084				47252		75701			807480	757749	914296	704362	720315
m1138	12.502	807.416	w/o MS2:Oleanane -2H, +1O, 1COOH, O-HexA-HexA; PlaSMA ID-2055	1916477	2403841	1214367	7882912	9033358	11295203	55692756	39330980	52165232	397243	598050	429403	24215852	29080602	21029844	19012670	23576250	30033794	2507085	1753086	1708586	889044	587492	1400082	2104894	2497070	2105841				158250	461264	346550	1824573	512721	899890	12997402	9579223	8860821	7982226	7012030
m1139	9.956	807.417	w/o MS2:Oleanane -2H, +1O, 1COOH, O-HexA-HexA; PlaSMA ID-2055	216379		193268	1475343	1885370	2252160	2753930	2131020	2386436		191376	184228	1481911	1583473	1499472	4701207	3473424	3998529	510175	332346	410722			86987	56942	93620	58030	40020				45125		75701			839692	957772	914296	739868	703886
m1140	2.422	808.245	Unknown	2551369	311335	340061				1802	38488	32177										728455	3847854	6921190	1880349	5812577	5295724	5578574	8076386	6155136				6209689	1962984	1870437	7491290	7189302	2225257	1498436	2619998	2330048	2283080	2266281
m1141	12.59	809.432	w/o MS2:Unknown (carbon number 42); PlaSMA ID-2057	4043732	1968648	2032225	4757604	6074448	7767161	43483464	33635588	40607836	334210	649523	559881	12711286	13464097	9291534	13092254	10393576	12835929	5196604	3631376	4909126	2696172	1709099	2972322	2687256	3967930	3634545				431019	1147082	1294884	3443347	2086875	1916251	8306689	7842986	5576640	5847868	6260422
m1142	11.683	809.452	w/o MS2:Soyasapogenol B base + O-HexA-HexA; PlaSMA ID-2060	257633	89182	426222	517399	467296	641093	3364826	2721708	4427816		44076	29095	1390917	1511208	3048341	1124370	719429	684261	3655968	4354828	3876753	113329	562931	633214	810069	924345	783835				31985	128942	165926	1010638	447773	577022	2431605	2804037	2998118	3103314	2428319
m1143	2.824	810.28	Unknown	9170122	10794491	8020645	531			735477	696866	348508			407							18086884	1856821	18567906	4739842	22063400	5233376	4297104	1649344	1850099	2112	8923		2301552	23670488	23494938	25302608	1864268	25984602	4790474	5514814	1949953	6732490	6820220
m1144	2.594	811.265	Unknown	689688	278184	222412				25021	35759	18268										1274986	2811584	5014102	3923320	1458108	1424048	5725160	3212769	6099200				1557470	3637484	2720448	7200799	1666934	3086324	210401	543923	260294	552178	1259853
m1145	12.796	813.387	Unknown	282920	146009		459498	899624	917531	5060216	4500640	5329358				1721831	1518749	1756834	566040	293101	385289	44224	53472	45148	71976	154810	180381	221873	651060	558150				70540	185283	184312	768114	163146	236172	650491	775396	506767	498402	451902
m1146	12.312	813.387	Unknown	6783	5979		180968	198066	284884	1382636	887448	1518958				478508	373883	454644	1535862	1066930	1371795	4392			2249	3045	5635	6934	68704	81851				1404	3682	3640	53354	5098	7380	133285	182105	203632	196544	152444
m1147	5.844	815.245	Unknown	40159																		449253	91229	1331880	2183530	1379879	2227811	566543	2345777	1798701				2051976	2178249	2136330	2082708	781202	2094048	936039	676026	503710	328940	926592
m1148	5.711	815.246	Unknown	18871																		1092355	115583	1331880	752840	1995889	686509	547963	2259125	1618128				1926705	2174052	2040650	716126	2040714	2094048	936039	705326	519152	1027756	617027
m1149	9.842	815.326	Unknown	39234	21022		10935	10106	10542	56844	88812	54162									9931	1498850	1441513	1562372	240230	90120	97824	149531	259488	276991				84927	16086	46790	243584	214139	179413	96381	104762	77446	52183	94228
m1150	12.896	815.395	Unknown	547005	25136	19301	408915	722762	1049797	4793143	3879239	5351972	11442	26383	4302	1036271	1015772	1341755	255416	138443	23141	275389	154717	139197	153775	968079	1105223	1550501	2823212	2137585				494331	1580343	1260348	4886840	617470	2106376	46950	194620	229462	186345	365836
m1151	13.38	815.435	w/o MS2:Ginsenoside F3	229	3197	5926		738	362	108824	76912	14308	2623	3020	2467	1594	787	267	180	372		8003498	15677619	14365771	546	2397	6288	42600	62285	52225				465	7625	2566	27510	1507	7160	7173	124086	9963	82326	91035
m1152	11.428	816.333	Unknown																			365504	683824	778138
m1153	6.008	819.164	Unknown	369449	714472	671754									38602																		28373
m1154	6.752	819.282	Unknown																			330676	355520	384195
m1155	13.258	821.434	w/o MS2:Licoricesaponin H2		70379							681										200481	511863	707462
m1156	5.941	823.178	Unknown	102145							2405											321244	426691	465097	607321	428521	660326	660185	490138	562782				879756	1091377	822388	720547	1046638	761566	96765	120657	128303	73466	306810
m1157	6.943	824.372	Unknown	1366449	1492000	1583860				45109					71323							203762	283094	196170				297536	95758	74522										381711	501958	451541	247984	386935
m1158	5.889	829.222	Unknown	68251	1538	2467																428693	720904	259124	413687	505010	1659269	1427370	2291260	1397034				1677592	2129356	488107	2126941	1942500	2168229	318370	297374	142882	537177	201336
m1159	5.635	829.224	Unknown	203542																		1773691	1085270	718512	1536926	1951647	1936200	1644442	815561	1677590				1440201	2150820	1916929	1344140	1966021	754324	253099	154590	212587	205424	362874
m1160	12.795	829.414	Unknown	350610	189773	175660	138504	229556	175143	2223250	1809115	2911652	164631	150317	84397	143116	183389	316831	232317	319982	176239	20122936	43164716	43793200				551233	828858	798269										1993593	1852574	1767865	1627180	2471048
m1161	11.004	829.416	Unknown	9593676	3329634	4257929	3524192	3718674	3496376	16923516	15950454	17925286	1019259	1027066	1101428	4032713	1836523	3359780	5401883	5023828	3378922	4472690	4919574	7159901	787541	1259016	1805181	1645678	1956832	4086715				338183	355969	406506	1314920	1153860	739748	5704547	6260243	6143172	7635225	5332283
m1162	5.626	833.252	Unknown	847502	37310																	2332398	1922430	1705230	3460663	3820538	3381394	3349084	3616964	4248652				4444494	3769702	4031939	3728755	4352462	4256714	1080174	871568	591602	687179	451675
m1163	5.768	833.253	Unknown	847502	36144																	1544425	1838170	679124	1539683	1220073	3491345	3010359	2583262	2647398				2637721	3321040	3798627	2898729	4652917	1474811	1080174	648177	839931	808702	740335
m1164	11.265	837.37	Licoricesaponin G2; PlaSMA ID-2095							10169	1357	751				8253	3656			503	10380	1882712	1802142	1861834																2102	929	33642		82406
m1165	9.725	841.329	Unknown	225486																		260708	576986	467710	248459	401642	232060	234407	416706	306492				197621	146099	189051	454942	321729	486070	249906	83670	119135	206621	178898
m1166	9.962	843.394	Unknown	143937	67662	170222	1027634	1056007	864029	1492326	1170121	1279019		111745	116997	731185	438837	1245141	3937197	1386840	2174735	293133	189005	108207						47310							34942			196228	345080	447016	411360	338553
m1167	12.567	845.411	Unknown	471901	279095	301693	1055004	1165941	1165611	6589625	4346108	7411422	83357	116412	75009	2112912	1609598	2144967	2058944	1523505	1704834	922423	526327	1080968	431534	222281	551439	317843	486440	409548				81811	88638	185029	434049	264231	271072	785132	1309530	778362	1216768	1201018
m1168	11.693	845.413	Unknown	13675	40321	62579	207952	352677	323850	1338574	1138944	1531041				426870	350342	576063	761195	410534	709403	578712	451575	481307		119309		96423	198616	170420							132832	44463		322721	427334	344357	466007	420576
m1169	13.204	849.431	Unknown	828719	994828	1249600				19028	37016	56787										33429	119633	43862																		12313
m1170	12.867	851.39	Unknown							448256	210569	322925										2820444	5140442	3761418				44233	59835	38074										395491	353587	383686	324826	522218
m1171	12.892	852.465	Unknown																			217782	376736	643261												47808
m1172	10.289	853.37	Unknown																51863			688955	581970	964258
m1173	4.821	857.236	w/o MS2:C41H46O20; PlaSMA ID-2114	3008950	129632																	6567890	5605807	10205813	7713134	4758271	15526044	8076022	8971728	7848446	58817	24705		10787675	8294650	7746488	6686575	8684854	10416490	3742275	2999520	2866264	3264082	2034900
m1174	10.984	859.461	Unknown	1714708	181790	125442	119742	78870		3848134	3739661	3382252				77304	96889	46177	118638	87787	70756	114990	230999	567569	237257	181787	309670	1047556	681357	1234101							356889	554434	229176	638087	1438238	1602011	1651365	1537541
m1175	4.901	861.247	w/o MS2:Smiglaside C (Not validated) + 1Acetyl; PlaSMA ID-2119	482651	465403	594920							15109	86409	81375																			5681			6863
m1176	7.309	865.186	w/o MS2:Procyanidin C1	695676	922731	930965				166995	71433	82949			74081							98839	205508					312209	418079	429248								84758		194578	75937	106483	207524	60380
m1177	6.796	867.198	Unknown	2560000	2910809	2874627				214318	262821			1571	1084							272046	812661	624708		41908		1550885	1832727	1607710				16381				106576	11747	683251	483534	652726	625423	579975
m1178	7.547	867.198	Unknown	1757967	1636021	1858433				136133	303459	37313	47552		24020							1776910	1072436	1336962		30904		2867930	3517580	2803807								47556	139949	183266	550274	258924	324480	282722
m1179	12.552	867.385	Unknown	61717			90592	45138	128703	778527	572920	814442				229332	293719	248476	181509	271306	366383	145068	68088	79821	44074	52726		65022	124710	92518					49397		128788			153964	184489	89055	127965	155879
m1180	14.03	867.435	Unknown							45698												235368	598964	516123							11751												59630
m1181	7.647	868.433	Unknown							42208	25370	14511																187866	117305	86878														25513
m1182	5.79	869.237	Unknown	224754												4102						892493	2412854	658820	543789	793439	1134508	907072	1375282	1279746				786811	1262664	1039746	1392041	671086	1331938	246713	459945	312872	48464	188043
m1183	5.694	871.234	Unknown	212056							363											2486120	812855	1969454	2685632	2909079	3183094	2062790	2711843	2465810				3028838	1661719	2135608	2729098	2404059	1765013	419417	348859	396076	440829	566726
m1184	5.533	871.237	Unknown	443363							3270											1531141	2585786	2103850	1909502	2867170	2137468	2456083	1969101	3503811				2510182	1918039	2385385	2245666	2404059	2118118	295585	623766	287875	242234	566726
m1185	5.795	873.242	Unknown	81787																		733034	1074568	605684	541624	1173432	770032	1018151	1149260	1178387				1529194	1174077	1165112	797222	1298714	1127296		48830		36026	45292
m1186	10.965	874.463	Unknown	197377	5552	7424		43705		2080739	1632908	1669782				5796	2861	68048	41931	39116	22063	364063	495914	407239	23608	40841		467244	163855	178749								25641		488330	335361	386462	503246	435795
m1187	5.704	877.21	Unknown	74957										4507								282268	352081	223271	312498	356845	662456	277314	282402	316691		56516		341932	592128	560596	480527	373493	711240	210666	15447	24805		112937
m1188	5.622	877.235	Unknown	18684																		36225	24413	32077	39493	137113	182824	105475	69520	66620				146045	84971	103940	195638	135653	161989	45610	1568	9754		27211
m1189	6.554	881.231	Unknown	1638163	1767858	2187904							265100	335633	245917					5685		5265	8587		5641	9979									9507	1853					174326			72090
m1190	9.735	881.347	Unknown	56190							71286											197039	129159	277526	96358	48831	124396	233629	381900	121856				68058	121407	15175	259940	408974	295777	93792			52971
m1191	5.339	882.25	Unknown	54010					1244				5761									268728	478156	676810	545260	871814	841080	489063	1242217	905456				954167	761341	738002	1088726	684526	1025260	115620	4248	209555		64637
m1192	5.276	882.75	Unknown	60489																		262334	379245	247444	537244	329762	530540	96470	723507	821378				520824	407586	244939	543800	119980	243102				18529
m1193	6.42	885.205	Unknown	888751	729163	991418				50337												20310	589320	229690		544		2084698	2289852	552145						5668	492	9063		70911	18039	180672
m1194	9.354	889.397	Unknown																			1660647	1597253	1339686															3170					20895
m1195	12.892	891.414	Unknown		38556	16034						60233										339013	731306	787718																105252		39997
m1196	12.713	893.415	Unknown						22441	418055	359660	317777				43652	51125		66148	23058	50535		22746	985
m1197	6.264	897.242	Unknown																			307032	243613	157319		26728		18759							47934	14072	11246		27039
m1198	5.939	901.245	Unknown	7097											3820							230574	22434	262384	179131	269623	253177	300757	68509	380548				484942	251189	405013	406265	320147	196572	65180			63398	5791
m1199	9.073	903.295	Unknown	13313																		378389	261999	451124	479892	335908	322165	533500	466543	558944				446931	449060	772474	623659	406680	536759
m1200	7.385	903.297	Unknown																			302848	161911	228718	348357	302466	235484	290612	351855	268601				425074	307066	359095	272009	391999	318439	34858			1049
m1201	5.674	905.242	Unknown	145282	42703																	616217	583632	1076616	531771	712926	648171	431040	282343	671717				969666	1083463	1229524	516378	658923	1760884	203861	36748	84860	67752
m1202	5.845	907.262	Unknown	883991	12179																	3182578	3883705	2754408	4323484	4012521	3536566	936591	4851062	3708364				4372064	3957374	4607109	5839213	4119286	3760546	1378345	253641	1062069	937387	297296
m1203	5.924	909.27	Unknown																			370711	422670	462725	335597	1133912	465597	538508	913171	1247954				1388829	82328	1416434	143688	79671	782989	61952	21902	22359	131715	13664
m1204	12.064	909.445	Unknown		95432		125721		112256	368326	459756	982253				141351	179333	117703	218800	156240	153717	423745	876934	924077			53380	129508		110367							72205		52039	90647	187040	173304		69388
m1205	10.945	909.448	w/o MS2:Soyasapogenol B base + O-HexA-dHex-Pen; PlaSMA ID-2145	676038	604175	631077	302863	338024	277760	1639885	1364874	1673819	105666	43828	116655	209693	206567	312105	662915	645885	506605	1103412	1273526	1569534	45558		78306	260095	251279	218664						26904	42859	70241	60742	790447	646428	608462	947963	735036
m1206	12.755	909.448	w/o MS2:Soyasapogenol B base + O-HexA-dHex-Pen; PlaSMA ID-2145	25363	73417					138264	48902	92029					2482					7227786	14349732	20373550				2279		729				22291						279483	217874	255081	282834	498675
m1207	12.907	913.473	Unknown							16125	17230	73127										624080	366289	269065	9357	13577	36762	198474	406532	350508				26407	87601	32995	305768	44925	250949
m1208	9.523	921.311	Unknown	492009		34375				29078							47055					1325592	1933752	1301407	2406961	2149958	901997	1745399	1838400	2037620				2342272	3187012	2368449	2065110	1828142	1958002	466856	965957	494741	441897	496905
m1209	7.803	921.331	Unknown																			63995	18858	75360	96260	32686	72308	12593	43899	83302				33661	48393	78464	76755	92946	73416				3784
m1210	13.16	921.45	w/o MS2:Hexsose-deoxyHexose + Hexsose-deoxyHexose + C20H32; PlaSMA ID-2158						25367	347495	244198	362730				21833	43741	36054					7303																		37247	26975	29208	26241
m1211	7.359	923.24	w/o MS2:Unknown (carbon number 44); PlaSMA ID-2159	535785	936066	903594							97971	132361	108762						32602																					41891
m1212	12.103	923.464	Unknown					1852		653390	336341	573297				1658	46044	31643	49137	1388	2066	62110	182374	193951				416028	496396	506830										59780	1534	1492		34646
m1213	5.224	925.268	Unknown	624939	30546																	2815365	1387852	3313336	5088156	3775156	3445376	3847067	5011505	2290407	629			5635384	4200356	4770676	2497469	4421846	5121751	1349897	1246732	1572494	1465596	646292
m1214	10.674	925.42	w/o MS2:C45H66O20; PlaSMA ID-2160	864727	418150	125036	47423	54301	75542	895692	1019401	1042038				178203	132932	121768	67825	87578	108651	136217	116791	156536	262052	329494	311884	1719780	1883527	1870410				304403	199936	222112	302412	797902	684421	713110	520095	653172	461138	493775
m1215	10.695	925.48	Saikosaponin C	19135564	7578800	3139810	1541900	1601827	1491396	39564348	38477684	54366996	184989	121277	266916	2927953	5097408	2613584	1461113	2590196	2379170	3167646	3213464	3210069	7078232	7380653	5775092	73010952	75719976	73898344	85002	187424	224552	5536281	5261212	4490666	13372968	14712154	15274796	27679982	22261474	14580933	11605451	11622217
m1216	12.364	925.481	Saikosaponin C	932675	516743	181234	300328	228091	542640	11679124	10523126	12369846				294599	849165	597265	257682	775114	1008913	17114434	34730472	40043924	983790	435149	544893	11579090	11243459	9077244				109436	189122	72002	265182	708629	480144	2375435	2295585	1758089	1492424	1830161
m1217	2.918	926.292	Unknown	873616	700067	489469									752							136829	265972	441295	315037	309826	929719	517226	429287	587202				534600	518034	1945904	469718	443248	454262	120125	210074	286301	39450	35523
m1218	5.227	927.272	Unknown	96840																		549714	412713	797498	617142	436073	418855	676627	550843	387853				552063	892806	2140792	458932	684077	723363		55806			98210
m1219	12.892	927.411	w/o MS2:Spirostane -2H, + 1O, O-Hex-dHex, C6H9O4; PlaSMA ID-2165	50016						7238	6063	23944										322897	556034	592976				4940	9076	10256										33430	8878	12969	7861	37578
m1220	10.876	927.458	w/o MS2:Unknown (carbon number 47); PlaSMA ID-2167	3480954	786131	356064	456370	231447	355322	3176588	3634032	3766690	112444	39863	15628	215077	317251	320194	515413	791096	638768	1088814	1444447	1305795	705804	628811	742216	5154156	5143168	5472176				143382	70657	175880	432587	380764	323054	661377	767584	767446	638648	859456
m1221	12.77	927.458	w/o MS2:Spirostane -2H, + 1O, O-Hex-dHex, C6H9O4; PlaSMA ID-2165	548				971	2484	214437	293243	402385					1246	838	992	1032	1707	9204770	17389770	18330394	8944	288	454	331860	415906	402013								2622	3435	659700	744912	673904	516233	1042683
m1222	10.688	927.486	Unsettled: Soyasapogenol B base + O-HexA-Hex-Pen; PlaSMA ID-2168	3728122	1476847	440787	316250	310626	565149	9102188	7276660	8563921	6432	3698	34944	545791	631667	450160	382652	482765	446849	755509	1118431	351858	1143809	1165879	1029584	13597025	13365450	12863775				901200	607869	732233	2047016	2415270	2462248	4491437	2901444	2495218	2083509	1946003
m1223	5.885	931.254	Unknown	775																		64960	254484	103024	478485	433496	566684	333811	519244	166719				102461	467950	70544	642017	149018	510678	104067	106259	56658	54909
m1224	12.648	931.437	Unknown	26742						361782	273395	381441	4531								29358	630871	891658	1262145				185280	318480	192648										23976		48501		46435
m1225	10.778	932.473	Unknown	91582						591225	392724	546989										24768	25438	56452				374297	311816	150018			382							120229	105743	120628	132176	69058
m1226	13.054	933.459	w/o MS2:Furostane base -2H + 1O, O-Hex, O-Pen-dHex; PlaSMA ID-2173							14145	9786	12090										1378209	1553320	1685402				3328	17159	46820											91966	112823	71709	72954
m1227	9.73	939.453	w/o MS2:Soyasapogenol E base + O-HexA-Hex-dHex; PlaSMA ID-2176	280264	146336	59204	695778	847544	783695	3545468	3782497	3618224				1061036	1252247	983229	597216	590656	965047	65814	63924	67905	273826	200329	306072	676581	841122	653680				270571	442737	331170	813086	427265	496109	655936	728663	582202	632001	567965
m1228	11.95	939.456	w/o MS2:Soyasapogenol E base + O-HexA-Hex-dHex; PlaSMA ID-2176	1552411	590764	337790	2048592	2312800	3465708	22216884	24424980	27593008				5033595	6219762	4871105	4006904	3715682	5496563	524401	772966	350511	1430520	1177816	2002699	4526938	6212640	4547832				645791	1225605	1175701	4153023	1835406	2650717	4779490	4216912	4941294	4712304	2607818
m1229	5.45	940.256	Unknown	50060						14223												120055	186337	85355	348308	365516	584096	311637	501244	505374				447395	81979	476019	235633	306063	456690	7068		68835	99710
m1230	10.636	940.485	Unknown	9660269	3471837	1215306	572894	918227	606725	36448564	39450292	42210968				1300382	1448630	1248626	716648	1976724	1332760	1517237	1426588	1193291	1587882	1503521	1144605	18482322	20991546	20060874				979881	828774	532923	1629183	2326828	2122724	15449344	14410508	8528104	7255960	7845559
m1231	12.055	941.466	Soyasaponin Bb	2389008	464822	498938	1311705	2249478	3033358	16225297	13543659	15024162		43351		3405200	4936129	3063234	4103678	2445410	3056330	2404380	1936773	2827514	5832096	2904846	4503410	12154286	8688684	5894278				1493112	4805844	5597696	8289869	7153255	5775338	2858470	3149807	4123396	3763854	2179782
m1232	12.09	941.487	Soyasaponin Bb	1626885	552911	164592	783681	1145725	1363036	12168917	9407057	11761807		1136		2595537	2668333	3473245	1492104	2626658	3853210	94435	1537421	421901	2524586	2121158	6477564	4756578	12481264	8981187				1254078	2393554	2227441	13315037	3496422	3200898	2617346	1611555	3112105	2271573	1964039
m1233	11.965	942.48	Unknown	1247139	212345	79305	517549	686962	947034	6367249	4395486	5591814				1622004	1808174	1093229	1163815	967266	1118310	874570	310535	363414	1960353	2264099	3226607	3416706	5179657	2677420				761165	1682642	1779868	6233616	2509204	2706100	1432653	1206216	1328687	1663207	1275300
m1234	12.003	945.431	w/o MS2:Spirostane + 2O, -2H, O-Hex-dHex-dHex; PlaSMA ID-2182				78263	84796		785419	376754	844243				106135	31620	144306	99115	10275	66107	521	8087	8529			26280	457	100402	2183							70747			44053		32325	26804	27411
m1235	13.014	945.505	w/o MS2:Ginsenoside Re																			260984	548354	684491				238434	175691	125487													18917
m1236	12.919	947.473	Unknown				57081	225545	83712	532900	488839	637490							81846	98239	88235	2920478	4934148	4634097		28889		1171110	1761917	1722540				50929	41001		75528	249808	157438	119311	183472	136541	313425	157600
m1237	5.876	949.261	Unknown	191496								1436										1806131	2049120	1999685	2819044	2102526	2299769	2258158	2769396	680606				1184217	2358032	248569	2866482	2645732	3057368	446124	455141	515336	481588	272891
m1238	6.039	949.266	Unknown	90014																		2083101	2122933	2066272	867500	1931995	2196544	612609	2737652	1265518				3125218	2262279	3118888	2807333	646727	3057368	191181	332784	300401	481588	272891
m1239	6.06	951.272	Unknown	1478	6108																	396776	509205	192433	919047	306429	612947	418999	612419	860390				382061	484333	441417	405403	314197	1085528	142147	5933	67568		27779
m1240	10.273	953.478	w/o MS2:Soyasapogenol B base + O-HexA+HexA+dHex; PlaSMA ID-2192	263688	252993	429313	389568	444107	505921	3663750	2271542	2945541		35059	63551	1011776	1210650	1071431	1466868	1047658	1126944	605609	360542	466657	124342	167521	284672	416883	427880	426675				24488	75811	67697	124633	72726	64424	740336	677026	823034	629300	738905
m1241	10.568	954.481	Unknown	58668	161941	15221	267489	172829	464728	2808496	2261523	2454868				1282962	653246	1035909	853570	889524	1268063	132931	26263	55083	12553	43727	18532	196614	195809	137241					9304		235902	150312	192703	523985	485215	703195	736540	720938
m1242	9.593	954.964	Unknown	12569						327856	215954	422909				84546	34361
m1243	10.589	955.491	Ginsenoside Ro	23022922	9532529	8440223	6159076	5558606	5124356	96680000	79089072	82546848	809293	904888	534109	8790864	9025274	10580900	7277255	10006059	8177517	29766732	30509482	28029786	11823601	11936179	10569645	68850408	72021568	69099704	90526	65555		4151303	4030626	4061421	10985056	13252575	11945848	29901028	32563722	36292036	34482100	32072880
m1244	12.05	955.494	Ginsenoside Ro	102300	41015	27458	45730		21096	2275159	1578143	2180864				59680	87092	187261	46208		81719	8484121	18403246	21752876	204330	73895	187867	3196904	3540582	2600747								70939	95838	952823	626335	373811	607373	687761
m1245	10.591	957.492	Soyasaponin Ba	3232324	2901562	2218313	1501174	1772223	1488535	14619697	12021501	12413285	159547	104153	93855	2254494	2250968	2911472	1766782	1603112	1222422	5003455	5092526	4586000	3516863	3117062	2660029	9919669	9818594	9277389				1098208	999687	1024373	1676731	3305071	3174943	4837700	4492184	5372422	4969792	4285396
m1246	12.16	957.493	w/o MS2:Soyasaponin Ba							350461	287902	429375								40396		2070820	4420620	6085002	36543			598805	677789	433792										49197	70633	87431		44770
m1247	10.688	958.975	Unknown	1137803	373142	190826	155135	40702		2522910	353455	3536460				204332	200772	279824	128415	118787	91167	198128	242961	263560		276670	142777	794544	1376665	1571960							342028		236887	678249	922226	743377	975674	692421
m1248	12.082	959.439	Unknown							481026	408947	481752						40077	93901	28127	6724	95913	79041	145506			20513	329998	252731	421258							31757			41502		21810
m1249	10.691	961.407	Unknown	504687	202390	115203	100584	120041	122031	751218	731152	861257				163029	119994	186753	89913	117004	95549	127004	157759	105678	98527	252361	179943	756385	985324	1045264				163685	155567	164184	345105	252844	271910	672331	801076	288533	345924	333720
m1250	12.343	961.408	Unknown	97103	19568		173716	206813	261065	1022017	916130	1122048		2736		117872	101651	119793	237569	224028	299565	1070906	1920779	1766106	61807	64859	100806	630461	842853	789402				18811	47532	41389	203019	74240	102516	199137	104269	265218	277045	292287
m1251	10.706	961.457	Unknown	5888051	3415014	973642	833860	859233	853254	10190479	8981076	10903495	83880	87145	117607	1278401	1038617	1495920	761651	979608	757545	1323750	1385928	1086791	1378464	2856205	2080398	10203206	14927931	13196088	53990	44566	144021	1831970	1500584	1540055	3821615	2543627	3292663	4836972	5592768	3610119	4300383	3832828
m1252	12.352	961.459	Unknown	935406	323785	68008	1449006	1986005	2109914	11132971	10111029	13145906	41005	63745	42584	1405962	1469259	1603931	2456622	2012128	2510553	13412911	24530130	23366584	946431	702887	879082	6910426	9527332	8219760				391032	550973	531443	2213710	869617	977148	2593935	2669786	2360372	2770692	2653675
m1253	12.399	961.522	Unknown	6501			39201	30368	30507	335067	252477	266619					4150	9333	44078	24123	24588	226036	447630	438271		613	387	102808	167495	270505					736		14605	6463	5584	10971	9006	46361	19958	51730
m1254	10.699	961.523	Unknown	87564	30798	10461	3534	5216	515	160883	127004	186434				5442	4812	5121	519	10676	8169	16694	13070		11613	31559	14668	127859	178359	182306				26081	28127	13005	39020	35906	33537	49193	76655	41423	58080	57499
m1255	5.41	967.276	Unknown																			153584	49999	542267	687675	632438	499051	417946	223962	71292				778274	544762	258302	355884	671190	111831	66880	3365	11048		38020
m1256	9.033	969.368	Unknown	146350						318	1037	379								160		1184970	1065793	1294543	1790295	1464407	1299902	1164596	1248374	430251				1831059	1160111	1299325	1456634	1732504	1912655	317693	586533	397614	315286	305752
m1257	9.631	969.403	Unknown				21355	16130	39752	171516	177351	148943				63958	79260	59722	75771	52363	55816	40856	54064	47083	79083	20918	48713	23434	36129	38369				65573	17023	53859	38000	60428	81089	49720	15547	33048	54869	24980
m1258	9.616	969.467	w/o MS2:Unknown (carbon number 48); PlaSMA ID-2206	711119	504824	445054	1959744	2422368	3120914	11018773	9083218	10903987	40414	194272	217693	4967332	4960024	4332008	4883066	3952011	4698436	1358437	1187083	886248	464865	429339	621688	761439	836533	786257				90515	256930	237825	529052	353101	428607	2270056	2103116	2364871	2121488	2195830
m1259	11.493	969.468	w/o MS2:Unknown (carbon number 48); PlaSMA ID-2206	186500	186777		303837	286675	576312	194068	3181629	3872160				1290407	1765192	1031884	961473	787810	1286090	105153	84070	101754	155530	63037	152572	498787	587691	308361				33178	56608		332896	215075	62674	1359771	771080	841113	437171	865672
m1260	9.624	969.519	w/o MS2:Unknown (carbon number 48); PlaSMA ID-2207	12684	36886	4961	65138	91912	103320	533202	437943	593090		13872	10095	187070	185311	163867	197781	150152	179692	47196	47246	36172	13746	14464	8880	37014	28485	27868					7054	7061	22314	7985	17452	81565	85095	131168	92051	66082
m1261	5.7	971.262	Unknown	680197	948411	642220							123283	147851	148325							31564	48456	8235	58160	12652	83957	6077	7933	18676				47478	12254	944				8965	5783			8151
m1262	9.784	971.483	w/o MS2:Unknown (carbon number 48); PlaSMA ID-2208	579647	100038	135133	857110	1013815	1385638	4781175	1436335	4313372		8917		2004590	2403134	1946460	1731997	1540561	1944696	1660049	737824	765114	465525	567718	630515	655189	991417	1120755				290579	282716	249685	575047	474020	409651	1365739	680566	1470318	1425116	1601089
m1263	11.566	971.484	w/o MS2:Unknown (carbon number 48); PlaSMA ID-2208	217013	289862	26008	158130	96970	170128	2993629	2302622	3056288				782439	1712350	377857	598007	876228	898763	308311	293481	406372	393040	445488	414422	1043959	1415578	1669205				178277	138492	214300	709338	324959	378854	1262952	869666	568793	362758	370150
m1264	9.969	971.485	w/o MS2:Unknown (carbon number 48); PlaSMA ID-2208	201188	258545	216703	783432	365157	512814	1857823	1418872	1567803		31707		1946625	1977774	826684	1828412	620519	649062	1617062	342890	837033	494708	531648	680842	297238	1502306	378291				201362	479197	267452	616812	347007	435555	574997	1308923	551466	1425116	575546
m1265	4.788	973.25	Unknown	107973	59398	2801																516383	1210448	517081	1537259	997408	600123	1774989	1582436	1547554				1111453	4925257	724054	1139945	2059929	1666666	367537	82250	549495	285756	375176
m1266	6.027	975.278	Unknown	3349						69399												119053	71117	233702	247215	276848	530279	43104	328424	169880				125785	428700	266981	285884	111676	195189
m1267	11.891	975.409	Unknown	923851	240800	175537	1385378	1705351	2093955	10725993	8077857	11247644			3587	3599691	3197781	3183240	2713261	1871217	2659016	204136	82618	149431	333066	665297	890522	3469236	2673407	2062748				265242	539275	543681	2112542	492065	896059	1417980	1843012	1802942	2446491	1656281
m1268	9.741	975.435	Unknown	200220	41235	58670	397556	518616	515741	1891862	753426	2031315				322619	599463	643631	464806	278797	342749	42595	46999	46053	59047	124281	223812	254649	521900	415188				80568	179927	199165	449773	112006	236249	180092	282298	326741	369722	331426
m1269	12.81	975.511	Unknown								47636											2517993	3879190	4601899					55696	20979				1218	1161	1703	2611	6854	2278	101928	132912	54017	41604	92912
m1270	11.955	977.446	Unknown	4094164	778264	64979	2963616	3640098	3926470	26611414	19266732	28893312	16942	16510	32232	6373619	5406860	6431749	5807831	3530378	4910112	3256264	3702492	2011347	2644184	5841762	7252911	9516367	12512056	11559193				2367476	5177559	3646441	12234520	3330340	6268086	3140271	2778374	5962748	6216724	3303606
m1271	10.758	983.423	Unknown	530317	176796	177567	65296	75239	44652	267120	41355	88741				96045	152578	139026	59380		84084	46437	98618		213100	293207	359119	107424	486931	489533				189628	171722	247538	248177	282410	207411	403189	246022	507867	317159	317233
m1272	12.526	983.429	Unknown							559016	161667	205447										548605	953554	833671				743783	556392	619582										15316			36179	11788
m1273	10.681	983.501	Unknown							730595	630102	572566							3510				23458			11871		199495	145014	187749						656	9112	68258	65147	122622	67873	23241		70905
m1274	5.644	987.246	Unknown	39470																		817306	978207	656575	1124445	102553	974845	915305	1547779	840946				977174	1008291	925293	1580134	944445	85618	40887	32723	43711	110533	75580
m1275	12.068	987.52	Soyasaponin Bb; PlaSMA ID-2221	51204	78514					890354	698441	555107		27565						21336	33542	814918	693010	1160080	28549			119682	207761	147445							24321	36969	20440	516632	838664	434854	285349	421723
m1276	10.414	989.453	Unknown	23152	105158	17885	338352	260160	239758	340431	1141909	1183347				478457	374870	524676	643862	571573	481595	128573	34431	35700			31915	14744	57288						14371		47582			289363	236001	363950	193972	141204
m1277	5.536	991.296	Unknown	13122																		803712	816586	795821	836985	1222212	550350	275282	1738342	1427541				813768	1732285	1140228	1329416	1069450	999916	21660	60228	69897	162283	280403
m1278	10.588	991.46	Unknown	6960850	2507763	3261184	2673252	3115579	2457219	20305838	17261938	19489866	439814	377933	339580	3873076	3215082	4807153	3164882	3282972	2815388	6355542	6823254	5389207	1932968	4064622	3996982	10225729	13404060	14012674	33464			1798215	1573898	1339268	3830738	1935922	3089220	4260332	6580710	8212228	9011359	8019983
m1279	12.05	991.463	Unknown	92208	66084	39374	159980	87089	66991	2869052	2324394	3148386				200245	217774	184175	105112	75535	259826	9111267	19906476	18518638	167202	279011	248589	2828290	4657948	3711324							104239	67979	115470	415360	505654	551530	610169	722091
m1280	5.617	993.297	Unknown	435847	269639	288911						30545			50342							1176272	1185285	876728	1389502	1491062	572867	879755	532170	1300110		6056		1731192	1260369	1678982	1480196	848377	1631964	255592	261110	139610	38068	100791
m1281	12.121	993.468	Unknown	71034						1329842	1058018	1569349				54629	56341	83744	48988	46747	56763	7893838	16008189	15056967	43420	49874	63503	1304635	2160200	1941274							30049			367863	281234	448295	538991	466228
m1282	12.291	993.509	Unknown	2072						41345	44893	57199						1741				2438427	4833760	4719264			2161	52388	91866	79591							1856			90758	50700	68894	184262	101709
m1283	11.934	997.416	w/o MS2:Unknown (carbon number 49); PlaSMA ID-2226	24231					40448	1142191	394948	959398				164555	146476	129604	60122	14995	67682						44120	119159	181173	177170					24829		115513		23242	134167	12435	35123	56937
m1284	10.598	998.481	Unknown	439948	212300	79166	74440	37517	20975	2154229	1839486	2158404				42837	47066	72182	45410	185082	60596	353744	571349	553423	70357	199597	189302	717096	526197	707200				60740	60459	50549	449977	268124	469952	780730	617382	573133	609851	522913
m1285	12.003	999.403	Unknown	45900			20694	24734	39435	547448	420984	593984				93922	57770	68312	33314	54014	97735	36752	14727		36271	81970	91642	255654	388775	444776				28744	68368	78703	84926	70631	126390	99728	13137	89268	47838	32054
m1286	12.103	1001.42	Unknown	19688						93267	174881	366101						32656	31303	21709	38349				33911	5839	99936	81491	188327	97257				6344	25200	10611	157418	8485	6420	18976	25330
m1287	10.94	1001.44	Unknown																			261631	150788	221874					19595											2826
m1288	2.794	1005.25	Unknown	309027																		4309949	3008456	4403246	5685828	6003718	5770167	4433996	5768131	6114795				7109128	6431419	6405556	6773000	3883268	7042603	1241110	2029217	2231638	2168210	1753894
m1289	9.645	1005.35	Unknown	9930			18712	74149	70342	34174	207394	236801				141966	101000	127371	140802	76586	90820	244014	256180	255852	315472	522022	712105	345205	435303	402876				706448	480690	709630	518425	263750	479262	6972	54062	27406	28075	139862
m1290	11.456	1005.39	Unknown	11693	5648		24973	27704	48480	265512	230245	261105				100293	117855	77135	49829	46949	46529	10259				4629	9499	11998	26077	24879							21810			32951	34584	23868	35373	36355
m1291	9.615	1005.44	Unknown	634911	339687	290497	1356999	1607420	1703363	5515604	4955782	6205697	72410	103335	71105	3048180	2245702	2857597	3281812	2014060	2246186	813365	548778	292624	145983	307028	484379	295633	488250	455988				97266	228862	92238	355484	98167	176830	763281	1024484	1257476	1455981	1315677
m1292	11.476	1005.44	Unknown	456339	120859	83489	462299	699664	851483	5998324	4799882	6354242	21780			2432437	2292517	2113144	1318906	1024720	1215825	246980	20566	133761	108011	187434	276087	578027	942885	795422					158734	94388	455854	67854	64471	771196	939443	949809	1279856	862882
m1293	10.478	1005.51	Unknown	105545						764988	894103	938861						25918				109052	15576	75196	74242	48150	44637	327292	361977	201698					36370	46111	61103	108126	74075	103117	161627	144850	62641	120534
m1294	10.651	1006.5	Unknown	2565781	930311	183906	51834	39805	27360	5109432	5818327	5905708				176708	189405	99360	98231	283942	365965	334064	283710	284348	544043	1024368	678648	9764086	11377176	10512088				297247	240828	283625	1433788	1409225	1289246	2072953	1911061	2188269	1205106	1289631
m1295	9.629	1007.44	Unknown	517591	136529	120792	743015	59793	69548	3188120	2667009	3472267				143036	106279	1938547	2008106	1152113	1296260	581716	678823	350215	149573	258527	407870	205787	374731	680833				70574	200238	37889	79705	45312	237996	586662	632686	824489	885707	885464
m1296	11.553	1007.45	Unknown	720257	222744	107773	384211	522596	497673	5126861	4345062	6339629				2065783	1996746	1714320	1190328	811042	1305664	482006	271664	177867	357935	529579	818247	882632	1697821	1373579				126834	364326	334075	1169753	244764	494169	933635	1009152	1114903	1080739	1054936
m1297	2.281	1009.3	Unknown	289683			19863															3185740	757035	3035210	1282524	3436919	375796	3759838	3382904	1806223		19585		3884070	463979	2322883	3728702	1900232	4422038	95179	794466	741889	286976	488439
m1298	2.593	1010.3	Unknown	5718									11698									97763	255661	1016993	170829	1010140	1260546	927061	1135032	1142006				442139	1141325	188272	381793	324365	728115	28847	56607	38928	31297	33667
m1299	2.377	1010.31	Unknown	16193									3290									348215	901222	183017	404431	803449	1021905	1566657	1024775	1142006				2099033	559961	757704	1276890	558196	561676	140956	261385	63525	80203	76429
m1300	2.493	1011.3	Unknown	72056												392						189470	704463	332528	1519836	2290142	607678	562909	616285	459966				2356846	871043	1742223	2193632	169218	380978	63911	34756	189119	76981	122399
m1301	9.734	1011.5	Unknown	78646						156569	205610	185377				2559			2777			31982	79982					297341	266639	192076											21493	39970	65900	39580
m1302	6.517	1013.27	Unknown	993598	275351	980641							159179	156482	245839							3099				31352		3142								1392								5531
m1303	12.729	1013.5	Unknown							5697	7329	16606								685	5342	1250478	1365955	1396248				7174	8881	6760							818		11862		11584
m1304	10.524	1013.5	Unknown	661969	300148	279736	90953	12000	85045	3749827	3067590	2878426				29950	142064	159442	93279	315838	212328	1791133	1818576	1961620	110685	49962	122026	1030020	360797	833716				15805	5003	9729	12575	133936	13107	868665	683023	637776	584379	603018
m1305	8.637	1013.51	Unknown	77743		17799	55335	60201	57796	509818	292816	319062	21544	52886	54233	17085	22717	51099	50756	43749	17262	47187	25353	25018		24038	33856	470559	560589	408743							27255	26471	24914	65926	66014	77403	82015	100856
m1306	10.481	1015.01	Unknown	213413	23432	46928				1583785	1361610	1405432				7221		12087	40422	34825	37298	734948	687237	582682	49400	44908	92307	312490	211139	479388					28021	17888	108605	207655	57282	523193	674980	384512	526241	485292
m1307	6.415	1015.28	Unknown	283342	262704	381123																								732					59010		3287					1088	732
m1308	10.223	1020.5	Unknown	248703	64453	66702	105011	78372	89414	2636534	3053416	2790969				283403	252614	291156	45219	80969	60303	99499		117995	136953	77334	234546	834212	511704	534891						74101	115129	48319	55922	589123	635949	541424	812241	425971
m1309	10.56	1021.5	w/o MS2:Unknown (carbon number 53); PlaSMA ID-2237	4036944	949431	482646	280987	297363	173870	12032432	9310837	9970968				596069	582889	592407	405107	812263	561020	1623296	1706176	1584583	1859656	1960724	2012567	19074822	19779968	20094350				584330	577254	914449	2553456	2489144	2579647	3244389	3453182	3633510	3709708	3014765
m1310	5.369	1022.29	Unknown	71185																		90046		38714	80847	148459	189168	42355	73261	190677				200069	168357	306973	314395	147020	365807				24204
m1311	5.986	1023.26	Unknown	49360		15441																807642	256077	413687	715069	808440	585465	556499	558992	607304				815264	626148	1196585	1097828	804258	982982	80582	39774	77154		5878
m1312	10.673	1024.49	Unknown	1056260	89221	41103		22413		1673596	1586703	2083856				48516	48745			39549	76550	186110	152846	103309	191802	122141	194362	2113319	2383491	2804738		655		110140	98152	101645	799364	463606	291646	674082	751121	648936	715034	573260
m1313	12.526	1027.51	w/o MS2:Soyasapogenol B base + O-HexA-HexA-Hex+Me+Acetyl; PlaSMA ID-2240							22527	2835	1446							51195		23135	637565	1628565	1972253				2892	458	16637														20942
m1314	10.361	1038.48	Unknown		36138	48435				578817	349914	944012		2636		35184	24369	69415	51053	27018	32068	77213		23772		54930	38311	14296	9929	6419							6142			70938	123072	65842	101848	70440
m1315	10.572	1039.5	Unknown	1165984	65667	108708	113897	201518	28595	3534726	2919537	3626200				124453	203440	261278	115957	118582	668915	638766	612483	772154	369577	666979	564639	3821116	3904901	4690290				307969	106901	228188	856094	521144	659131	796729	984737	1183191	1794346	1202799
m1316	5.484	1041.27	Unknown	267437	3499	694																1536866	1325059	524461	1339615	1926568	2239020	2497098	2462685	1745103				2527528	2382426	2150526	2417811	2328550	2864541	505470	395456	372460	461616	306414
m1317	12.31	1041.49	Unknown	40227			36992	93249	115858	950448	886195	858864				21680		69233	153910	85070	482698	3210241	6433524	7002292				315638	309735	327131					9234		52548			193503	142204	176217	246762	183557
m1318	10.701	1042.49	Unknown	340063	114603	101335				1266219	1042264	1021068				16651	126644	126218		167682		169483	183745	161900	91900	149493	110467	830332	733518	960478				225394	262582	228703	579879	234833	559960	364641	430933	338492	409750	375242
m1319	6.156	1053.32	Unknown			29454	1019															96662	206631	305159	405662	264408	233506	258107	279176	188138				313797	246074	323058	237050	526935	218934			35177
m1320	7.147	1055.28	Unknown	473818	562580	566758				710			116645	6760									946															5323				23725
m1321	11.837	1055.46	Unknown	130200	50159		239420	189533	384485	3719728	2652098	3507379				910182	493750	549169	1023454	443619	686797	15229	25159	62378			69055	60551	237234	224963							287762	92987	96972	598940	355246	135867	597230	579269
m1322	9.631	1055.47	Unknown	60783			24917	52229		804855	664644	820972				132232	196629	125008	107241	103431	100863		9701				23896		34610	181387					35620		64045	39490		30140		77841	51312	55660
m1323	11.942	1055.47	Unknown	70901	26568		131773	189533	84470	2610683	1618882	2054101				984755	339008	710452	687489	443619	816111	16937	36160	58955			38406	86111	139646	143234							263422	49640	51540	318174	136253	289652	271221	311677
m1324	12.485	1055.5	Unknown	3387	355		2284	2320	8531	71292	49130	81784				11819	17575	25932	4876	2470	9322	253775	613080	775670				443	1333	4721							915			3299	4820	8285	24683	10638
m1325	4.759	1057.28	Unknown	45732										398								154574	108901	78074	182830	168934	84310	127531	202241	174022				258089	238197	183163	223186	197757	348787	17288	50299
m1326	12.022	1057.48	Unknown	161186	40419		141981	118843	178168	1662951	1344806	2481082				645153	736617	373339	501983	356518	438506	1269266	1301748	1589388	175228	229375	394671	380318	539666	520654				148359	204036	127280	1081024	346411	310341	488133	225468	277603	306411	216770
m1327	10.674	1057.52	Unknown	1060159	575489	117726	127551	76621	114072	2362784	2227959	2439130				133190	185611	150752	128290	125499	250540	627981	619608	567626	636482	544690	438637	4895248	3927544	3672073				689429	356174	510234	924592	1294270	1018887	1082607	1128000	750312	1316570	1032837
m1328	10.599	1057.99	Unknown	122982						184903	179287	274620				21158							73137			177758	43112	321739	346808	264346							180934	19344	71050		88825	111334	103499	206087
m1329	10.617	1058.53	Unknown	704302	251013	52756	19716			1346607	1412364	1239132				39246	73583	76436		147235	84679	150121	190540	207087	111390	335951	130521	3129031	3031339	2729253				154932	62002	138349	203621	846898	736192	294041	767304	612477	453214	363968
m1330	12.359	1059.5	Unknown	64033			41035		97797	1058642	1063131	1223455							60043	92424	272754	3736964	7004171	6538846	216054	166004	209734	2472250	2605288	2414982				48652	128277	51872	439270	377365	375969	240160	209592	313809	179077	349488
m1331	10.569	1064.52	Unknown	153455				17695		801811	676406	515966											23288	34550	25271	70859		265693	107080	326059				19104			237280	86157	143075	60352	133804	107597	42138	58383
m1332	10.61	1065.01	Unknown	88844	39306					727091	541166	362899										53780		98964				156979	217217	272678							111398	172977	136245	207048	127392	128908	77457	172582
m1333	5.925	1065.28	Unknown	28572																		282139	535559	939686	608504	1016412	564126	557771	406462	1174912				1749893	968368	439466	917077	1220102	896900	21817	76345	240486		41042
m1334	5.837	1065.29	Unknown	6257																		390983	238871	497351	730364	452272	688009	337295	446987	695303				909377	594539	672597	917077	799643	802506	42505	31977	128214		15826
m1335	8.997	1067.37	Unknown					4150														399304	181371	331238	554839	580206	529221	462119	240328	378452				601606	406558	847088	594681	438697	635245			6693		63667
m1336	5.503	1069.31	Unknown																			520927	650888	497313	301047	197019	321431	439881	752342	523858				272294	852668	353735	854367	680603	323489	44152	48511	50081		108137
m1337	5.681	1069.31	Unknown																			338448	417817	329509	841965	563219	723917	439881	1382050	739817				754164	625300	903933	1323144	1155549	938618	7005	31381	19028		89490
m1338	5.778	1071.33	Unknown	274664		23286									21357							2270507	859031	1969499	2773671	2598561	830411	2849764	2621478	2326664				2844338	2491265	3079852	3072462	3388239	3861197	977835	687159	369546	509998	412813
m1339	5.661	1071.33	Unknown	343465		8382									6006							2492070	2722607	2191986	2891734	2598561	2863046	2192651	2822461	2422014				2844338	832387	2708668	2959918	3169939	3054382	538632	544988	482221	509998	412813
m1340	10.559	1071.5	Unknown	568897	576394	597589	172813	186040	245181	3866352	1911084	4153274	106259	59504	76197	482260	456126	425391	560112	855490	660674	2687714	2751745	1393155	242486	213489	172933	884184	966217	771440				64044	134619	99362	268130	336516	345713	1329075	1206698	1264405	1293210	1177372
m1341	12.039	1071.51	Unknown							221696	297848	314762						29395		30958		2499419	5298982	5720112				163324	135491	122964										58104	25191	58867	57951	72124
m1342	10.482	1072.51	Unknown	438433	563280	399859	221364	145661	179513	4342806	4145926	3779638				231572	262430	373108	265898	710827	422033	1869546	1112789	1408434	728283	177714	206001	5544369	6696439	6174388				404439	365522	470394	1260805	1482161	1748484	1531248	1460938	1347637	1459573	577875
m1343	10.337	1072.52	Unknown	1413427	356044	274299	154930	92807	53710	4147008	3745453	3337716				216674	205038	112637	207027	307421	172569	477598	1146851	961534	888355	673942	757033	7397412	8987955	8631487				484945	455345	546626	1587499	1829569	2001911	1435332	1341654	1250663	1343934	1197231
m1344	10.399	1073.02	Unknown	1353665	225462	67145	77009	63999	34679	290936	2694702	2821114					73942	205379		24490		235624	401286	382550	735084	838735	696961	8022091	9342982	8996973				633173	607062	520178	1454320	2221317	1589872	1209541	997470	1255444	990611	797080
m1345	11.914	1073.48	w/o MS2:Unknown (carbon number 52); PlaSMA ID-2266	41902			86340	61190	100513	1626476	1299809	1518319				380538	370890	330690	323612	106302	283039	628480	1104685	1273074	193373	264806	318781	816335	1409388	1134173				57805	194784	161663	870694	350410	475575	484926	317664	464270	381423	400197
m1346	12.12	1073.52	w/o MS2:Unknown (carbon number 52); PlaSMA ID-2266	14116			7985	10557	7351	297744	245384	286192				99673	25858	55760	70383	16219	22438	6608291	13665929	14705884	42789	18864	189128	289868	405361	335129				3450	12802	12952	177917	25365	25214	229721	316337	223765	467684	252505
m1347	12.241	1073.59	w/o MS2:Soyasapogenol B base + O-HexA-Hex-Pen, O-dHex; PlaSMA ID-2267							1338	876											61850	184021	180656				4578	8669	2348
m1348	10.467	1079.52	w/o MS2:Unknown (carbon number 51); PlaSMA ID-2275	815392	283819	120405	68418	53314		4066088	3665792	3597724				97990	88014	132417	140498	437246	212677	1791649	1725899	1298006	195896	302977	146644	1148122	328343	1098999				58989	52628	71861	352255	372456	375861	1323027	1240562	1240904	1119374	1027526
m1349	10.283	1080.03	Unknown	278669	292074	83086	8665	9613	7928	1102803	1148464	1101475				46684	36464	32718	51086	113890	52931	1397956	1325265	1167715	146731	223862	97244	1358283	1729902	1703205				37626	125604	90796	525367	410206	465371	407465	388084	379400	358347	354022
m1350	5.452	1083.29	Unknown	31210		15092																200629	654009	167587	432691	539981	320333	198646	663631	204037				611101	616452	270405	499794	587855	368626	94947	22833	110107
m1351	5.233	1083.29	Unknown	81860		53661																529965	654009	525796	155938	201076	128771	544225	663631	634308				250483	462215	740832	218729	587855	838320	94947	82990	38251
m1352	12.428	1083.5	Unknown	46241			72286	71762	90954	1402792	1050861	1466198				274100	273133	302207	88260	156747	121111								22589	40996									23181	297081	146955	192807	210629	182257
m1353	9.306	1085.39	Unknown	118438														2692				1323634	1283533	1170560	1738980	1421703	1208508	1616728	1470933	1510489				1864002	1569121	1895452	1819564	2385901	1825594	465483	380476	384481	251233	265424
m1354	9.625	1085.47	Unknown	10907	30532	665	35279	50492	81764	777625	1053818	976021				223650	122734	170813	339655	298576	435878	129404	107818	130321	6806	5002	7627	18901	24044	18410				1012	8068	2821	15306	6763	10503	209312	63645	73394	84956	202761
m1355	11.442	1085.47	Unknown							654321	577871	563995				222767	220011	179170	127473	91116	209555																23497			110873	130120	45301	25946	79598
m1356	10.064	1085.52	Unknown	769767	314060	74413	270263	220082	344225	3640460	3380070	3319153			6559	567656	497588	449613	432843	453332	583156	183118	148996	141680	775527	460799	660269	969005	1265172	1049102				302169	448166	306785	855156	490684	561741	531612	754576	944630	1136954	574658
m1357	10.327	1085.52	Unknown	147904	323490	163735	579284	683822	661532	4128916	3019232	4577539			23317	1152221	1080234	1017208	700334	848706	822906	45574	43975	34719	130172	120611	228372	185431	277883	309136				103839	203257	100170	287172	147497	154696	156681	320048	1162702	374805	250002
m1358	10.321	1086.59	Unknown	5081		1949	27321	36012	25116	246624	157543	267802				41871	91443	23618	42013	55351	34816				5883	4742	15855	8400	8894	6261				2270	6108	5077	13706	2795	1270	52348	17359	16139	6702	4615
m1359	10.344	1087.52	Medicagenic acid base + O-HexA, O-Pen-dHex-Pen; PlaSMA ID-2280	135779872	34399272	13681219	10046942	9320201	8775985	228282768	199056608	193450048	634323	543610	810681	14829363	16113028	15684682	7090103	12034654	9292668	18779514	19713468	21550984	67803120	45558408	45754648	563969408	448678304	427185408	491748	620687	386621	23627806	21216152	23610702	50821472	92525368	64669136	91650096	86981296	86447384	76672536	74367240
m1360	12.079	1087.53	w/o MS2:Unknown (carbon number 52); PlaSMA ID-2281	97922						408682	314867	279715				419	520		364		352	805466	1947270	2331445	7993	7366		700214	609357	441336				758			628	15921	29119	90724	37888	59752	54197	57198
m1361	10.341	1087.59	Unknown	10182666	2317278	827252	548984	518186	446843	21217012	16122603	18110050	29079	98434	49470	912518	942219	932620	491444	650949	474404	1172079	1265533	1458952	4680896	3669718	3501662	43321744	36579000	34662924	48489	45873	7651	1561115	1490983	1532786	3664842	6792102	4328145	5940668	5426585	5652326	5392066	5152172
m1362	10.334	1087.97	Unknown	4318582	816804	187037	146935	117186	143446	5980932	5848854	4961375				219257	270837	211697	60604	188373	148836	404276	369367	417081	1939922	1047982	1029558	21153530	15679373	15199928				502240	423775	502814	1320605	2618630	1903584	3090031	2829982	2789342	2211424	2169071
m1363	2.644	1088.33	Unknown	16023																		212574	246968	482085	1449291	470496	493132	341981	316768	346649		4970		1117271	2411486	1720855	966389	267376	1547962	36802	72497	189943	52921	26840
m1364	10.332	1089.09	Unknown	1935334	332881	74204	48448	24770	31705	3930762	2934924	3478602				72389	86301	97463	32814	69649	38726	141271	134285	181538	773669	655969	583851	8681508	7233908	6903164				205151	250116	225493	567961	1190440	705321	1076655	959778	950410	933380	955880
m1365	2.881	1089.34	Unknown	344040	41242																	3025810	4008154	6246167	7463190	1596811	1224501	5834153	1718635	714259				3839103	6496986	1730322	9520046	721662	8515280	1454276	1234632	1025804	1385818	250600
m1366	11.916	1089.59	w/o MS2:Soyasapogenol B base + O-HexA-pen-Hex, O-Hex; PlaSMA ID-2283							101	3368					12808						72196	184670	221620				5725	1870	348
m1367	10.348	1090.54	Unknown	4998896	1319556	638981	433182	449791	443107	8330922	7303086	7279012	41379		26141	706604	702210	727301	346826	521910	380957	1444122	1498092	125311	2939263	2273776	2117273	18017014	15398823	14648685				1058562	1235139	1201663	2305308	3826338	3068828	448634	3362436	3345026	450936	499195
m1368	3.357	1091.34	Unknown																			483328	363597	807344	97891	222710	120449	65473	204715	154326				225198	88677	1039139	537802	591278	137362		6230			4682
m1369	12.16	1091.51	Unknown								24743											1142414	1852420	1838915				318416	216593	161017
m1370	10.269	1091.59	Unknown	107425	66717	39307		12052		246770	116583	163157				34882	37048	34885	1468	6048	17089	79820	12392	9817	77983	56447	16581	378290	253086	249192				18932	1126	7249	58064	62466	20076	82589	54842	124077	157053	74226
m1371	10.361	1092.52	Unknown	350186	48057		40802			695425	473112	725349						45763		17524		65535	224305	33302	175828	309030	315605	184131	1061300	1704250				94298	228457	85333	507876	213092	322368	218479	220535	241047	227782	395224
m1372	10.689	1093.5	Unknown	982147	355588	189010	134079	59447	210404	1988530	1971584	2140267				195723	198211	241537	101522	347551	288495	215440	241637	171768	253733	469749	408770	2280372	2876512	3057999				144713	261845	250992	749231	495403	653675	612132	816320	614704	783370	794683
m1373	12.16	1093.5	w/o MS2:Furostane base -2H + O-Hex, O-Hex-dHex-dHex; PlaSMA ID-2285				6295															277736	611122	599874																				23906
m1374	10.198	1094.54	Unknown	520469	87297		46907		370	2306191	1570284	1692115				28420		4309	271	2485	1901	89637	33465	49779	132263	237632	237550	1731502	1576094	1659424				1718	10317	7944	201442	316458	289560	622567	410721	335202	322553	401402
m1375	5.801	1095.31	w/o MS2:Unknown (carbon number 52); PlaSMA ID-2287	13202									10563									147518	79312	127223	258970	56758	254866	297614	243300	293827				349097	277594	214140	382236	397496	300180			2256		4624
m1376	12.241	1095.5	Unknown		8804																	157897	498758	450335					2187													2396
m1377	11.675	1096.51	Unknown	91418						214198	238646	166047										6652	10568	42812				530424	648218	655627												35296	44950	44614
m1378	7.675	1097.3	Unknown	137011	247314	145036
m1379	3.861	1097.37	Unknown		27665					270548	179025	233568							24257		7008			24316				1993		21613											82833
m1380	9.404	1101.51	w/o MS2:Soyasapogenol B base + O-dHex, O-HexA-HexA-dHex; PlaSMA ID-2291	2374164	605126	328996	1804560	2407509	2601300	15195039	13542788	16190582	26305	44020	22545	5122990	4997356	4599511	3195891	2311516	2985056	533116	316842	484221	2340574	1827004	2558481	4862130	4067500	3413430				884170	1432656	1594557	3164302	2613204	1762232	3278766	3269294	3917894	2871884	2783240
m1381	9.382	1101.59	w/o MS2:Soyasapogenol B base + O-dHex, O-HexA-HexA-dHex; PlaSMA ID-2291	22911				17416	9770	281940	199700	264717	6187	5667	3059	63977	44846	77813	33949	9217	40588							56078	50119	44336					8674	15108	40263	26379		16149	23863	58721	21329	14567
m1382	10.237	1102.03	Unknown	73126				42818	39713	1351041	1155587	1566722				104127	168410	77449						28039	59989	97209	59069	51612	14416	221197					24144	17297	203796	23162	84981	284758	130116	317247	166046	123120
m1383	10.233	1102.46	Unknown	229786	68118	17325			2047	461507	454128	1341365				21904	19606	14663	2579	1444	615	13205	5845	34164	155016	65244	86982	1409244	1192961	1073825				7650	3252	11448	45150	156753	49464	246360	200047	198615	137013	96375
m1384	10.234	1102.53	Unknown	8441629	2201680	758303	169326	127512	71428	17593752	17677692	17375718				571908	550050	533421	28122	191372	190435	502818	498444	1130457	4959792	3043027	3286294	41602816	37025372	34203252				375584	289211	741844	1921684	4999078	2379392	7102782	5769734	5716536	5007706	4490141
m1385	10.223	1102.59	Unknown	729178	157252	79766		9932		1706832	1618165	1830336				39359	39625	45216		15510	3004	104128	33173	83460	403752	308946	285121	3488132	3180765	2875274				25700	29044	69156	144007	376222	188653	553621	400569	425080	466391	420877
m1386	5.743	1103.31	Unknown	143803	178213	245994																					529		195697								155275	218779	161178
m1387	9.631	1103.47	w/o MS2:Unknown (carbon number 52); PlaSMA ID-2292	137950	88375	18515	172723	212433	278235	1408109	1290365	942474				417397	488369	385086	253436	239615	322336	181617	106669	160342	552711	363166	586488	346448	352782	306550				147816	293959	318685	595604	529719	403158	590800	451002	546222	411123	375588
m1388	11.504	1103.49	w/o MS2:Unknown (carbon number 52); PlaSMA ID-2292						4682	461640	310875	456049				111353	188441	44254	49722	38472	103631		710		45551		84583	106043	145246	97289								3401	23907	6818	40669		65610	46349
m1389	9.707	1103.53	w/o MS2:Unknown (carbon number 52); PlaSMA ID-2292	1648512	381326	113889	1112318	1460531	1728758	5844671	5066934	5646732	4829	35176	63109	3040502	3168195	2723098	1487748	1367388	1896735	1446691	543440	541146	2611313	5037176	6429546	4415051	4546241	3915484				1616176	2989930	3201019	6838137	2731270	4955978	2075974	1924244	2085126	1771946	1630900
m1390	10.32	1104.98	Unknown	40756	98263	15606	38432	60192	60188	739182	440230	714258				130602	123096	112635	74088	71950	67111	12401			14866	23418	36941	69296	87909	80449				4794	5113	4381	23896	12519	35164	97270	47906	166745	123959	54445
m1391	10.255	1105.01	Unknown	445805	98263	49933	123881	163777	149296	2820204	1754771	2980967				364575	373072	297109	207211	215876	146446	25019	3793	62363	265455	329743	167519	1237308	1422972	1245698				42868	104143	54268	404098	241242	298394	407818	572717	610716	447570	847760
m1392	10.344	1105.52	Unknown	30089564	5153692	2203788	1865967	1741574	1101705	46389432	40772492	47302944	43979			2832635	2903340	3251501	1214363	1919355	1307292	3709379	3673837	3387546	9126046	11704409	12111712	62778656	67026304	77817024				5373190	4909918	5247989	13909099	12017200	13412921	13544740	16247950	17857246	18017436	17358254
m1393	10.342	1105.59	Unknown	815577	106859	35934	22647	22593	12258	1759296	1144505	1483222				52835	37325	61389	24969	41686	17502	67985	90916	87795	192647	326374	315441	1660891	1847078	2151696				114236	139048	102368	279294	304715	241354	314139	296325	325764	366042	388747
m1394	10.35	1107.46	w/o MS2:Spirostane + 2O, -2H, O-Hex, O-Hex-dHex-dHex; PlaSMA ID-2293	851554	166048	66912	48929	39459	34456	1191582	1344016	1308890				60076	62881	107462	36162	100874	46185	94379	115362	109636	234968	303001	281119	1794493	1834530	2140618				143150	116327	168054	402235	320803	374298	407136	555602	539299	581031	536563
m1395	10.341	1107.97	Unknown	454575	85776	27404	24151	9208	17872	539326	546949	596977				27059	45886	59200	8268	32120	29142	57766	56199	52419	130549	153173	157928	1006642	1029598	1214564				74455	67347	74519	217296	171098	202536	217974	297517	301689	326398	291050
m1396	10.876	1109.47	Unknown	193154	16440	6851	48550	55068	44676	242531	236284	261975	2662			3804	19063	17030	37766	52127	32944	106739	118778	80741	45718	91844	79106	164397	172524	254594				115235	121706	129238	419402	233596	262309	87917	113123	176844	157761	117616
m1397	9.634	1109.47	Unknown	4993				2304	2766	283852	181910	274283				3559		8768	3283		3113	10014	5366				4144	16661	22336	18241							1731			5804	6006	14171	13489	7762
m1398	10.849	1109.53	Unknown	2149941	257313	140168	696354	660995	563813	3363612	3013894	3016188	80613	53904	75161	138419	155879	260173	458172	685150	444164	1225664	1296377	1307381	661754	1261598	1107347	2957447	3073818	2446789				1627000	1604212	1518474	5562751	3413775	3545617	1400211	1625232	2318662	2308596	1855606
m1399	9.634	1109.53	Unknown	72932	1082				1477	1950775	1708591	2243952				52679	24906	69727	2600		1222	83634	87576	31884		44995	46264	195559	319903	409581							1378			89654	235763	172647	224198	101791
m1400	9.734	1110.53	Unknown	300110	2373					2524018	2753258	2578058				50895	56927	96952		2139	49227	179375	54491	82233	165487	49867	136759	1190149	985652	730221					38420		116185	26448		406330	416217	542031	463275	442981
m1401	12.282	1111.51	Unknown							26969	15225	17697										504814	1006612	953335				57990	50010	39309
m1402	10.081	1112.53	Unknown	132654	32014	18941	23351		18134	518367	667617	749977				34038	24289	18773	48664	92950	48930	35862	18386	11184	853	12570		177528	3427	106296							92590	1326	48635	80042	93500	77314	83409	129257
m1403	5.756	1113.38	Unknown							8697	33899											1441	11924	1659	82373	26570	36778	87789	161684	123323				210887	113313	183993	54361	71060	223238		33097	4797		40999
m1404	9.939	1115.53	Unknown	431725	88816	26982	72247	62268	110756	1861519	1289761	1730210				178647	268800	408101	190286	156487	117544	133893	25875	1103	175910	174374	126041	668779	281116	333231						21777	222038	49368	25762	321627	295962	424037	331992	355726
m1405	10.313	1116.52	Unknown	2256576	549882	298933	314773	171891	198244	3910114	2519639	793419				424952	350310	717710	136255	278984	121589	251573	397220	318162	888631	1124686	1051980	662809	2774914	3062368				555439	389203	445738	1121291	978715	740082	1353687	1375119	1433510	1587062	1479444
m1406	10.308	1117.08	Unknown	63418	10042		9307			209432	80365	49281	5752	20828			2434	14774	3280	10550	6192	1364	11119	6223	24264	43240	32134	76994	90850	79103				14247	7456	8281	24948	39390	15397	51999	42678	58431	42956	37136
m1407	10.151	1117.54	Unknown	7248516	3707331	2056541	938058	745700	838316	19985128	20064480	19290900	185753	206693	272169	2081872	2150720	2056734	945134	1779890	1456167	6060085	5480171	6756770	4056468	4438950	3632610	20489198	18810898	18171082	37473		46733	1953925	1587830	1867210	4143579	4454878	5205928	8061354	6483294	6585698	6202694	5917580
m1408	9.982	1117.58	Unknown	1223574	1473279	366585	148337	128896	131275	7697642	8268320	8065184	25431	25701	23902	309742	774765	337955	143209	315485	523398	6000162	6713044	6770166	514452	622248	475298	2977142	2607481	2468109	4402		20535	238987	167121	216124	466039	494753	683652	8061354	2373118	1226475	1194804	2242332
m1409	10.342	1118	Unknown	428907	285292	103040	73268	106992	49292	2101448	1829067	449991			16788	154284	294524	243964		130958	97340	376579	465996	352610	700223	769045	918397	456589	2752407	523052				547146	431762	232881	885565	971972	167133	261128	271267	297142	1045474	972553
m1410	10.265	1119.02	Unknown	696218	133108	31858	41551			1017331	918450	876753					20057					84360	149531	295225	280508	311448	286832	1663841	1872963	1188667				164394	100341	92319	365518	296300	411230	497284	346249	410367	365251	492113
m1411	9.382	1119.46	Unknown	21304				17969	15449	740325	520743	801500				49080	292914	63322	40137	16376	29964	1554	2768	51	16286	17896	3362	106129	98817	190744				13467			66777		32516	18731	37985	56485	43223	20935
m1412	10.183	1119.55	Unknown	1765924	932138	391887	191356	183776	124489	6826260	2600901	6499752		1138	1182	417713	383171	472302	172786	393386	334076	1806785	1572075	1805387	1122263	1143499	1075992	8285789	6963966	7385319				558751	391208	392732	1122158	1154660	1451344	2499094	1603321	1464099	1373869	1450007
m1413	10.071	1119.58	Unknown	605617	440866	146435	37239	74135	30366	2329440	2473424	2239686		2180	2229	216363	141987	161981	63113	137792	238957	975279	879927	901323	494225	432761	365565	2552800	2230402	2099350				201013	136517	136484	351755	496564	520160	878671	868874	739404	600643	716243
m1414	10.226	1120.52	Unknown	5784240	1344792	542963	357950	182606	202326	11300610	12650986	13237095				790404	598393	767653	67757	375716	183621	918896	797572	723711	2103515	2553310	2758426	12637441	13180808	15831013				372976	522116	590428	1697820	2464258	1830879	3605601	3971295	3929381	4256021	3874288
m1415	3.202	1121.27	Unknown	133489																		1148139	175209	525638	595487	313634	240568	628706	1013985	2209574				275013	1362817	1478250	854422	986814	966580	110276	195642	41802	35532	46263
m1416	3.366	1121.27	Unknown	41028																		621358	957911	279922	229180	1325157	1314064	341551	1192699	1363488				1301911	1005965	1315595	981810	529199	583355	3995	92481	7603	81462	3231
m1417	10.264	1121.53	Unknown	6262281	1782373	580332	638038	637500	666118	13512679	14871612	14910019		13814		1200202	1362567	1755985	949719	685244	621619	1313540	1303252	1282577	2684788	3602050	3749161	13262506	15961157	17227530				768281	622759	1058055	3082334	2550899	2884097	4649611	4489002	5191258	5659664	5635794
m1418	3.497	1122.27	Unknown																			138566	127661	10203	111234	76897	66806	95649	241539	50490				167237	226247	174956	645961	606666	760180
m1419	10.347	1123.51	Unknown	51917460	13607769	10024017	9206274	8624121	7616786	80438856	72759872	83961024	766238	533226	742263	11769272	9171645	13200223	7379198	8551503	6532216	11840334	12792705	10812009	15507151	25701168	25785466	99382888	102942688	114283064	295735	225316	202561	14156378	14264316	13417233	31450256	20773486	26365800	22296110	31030626	34332680	37758860	36320152
m1420	12.16	1123.51	Unknown	93659						348840	271455	435187					7169					1092598	2187346	2437692	30229	14026	91913	427235	1115795	472745				15252	30076	10249	68538	46881	57853	42820	15399	54937	101314	39778
m1421	10.345	1123.59	w/o MS2:Ginsenoside Rb3; PlaSMA ID-2304	726390	392208	286102	218901	180438	149703	1411102	1040578	1344050		6242		324946	216709	340777	108199	212312	64274	331250	312269	300616	455378	340114	312011	1472083	1550459	1757047				368921	375113	392754	903835	270848	709366	581274	851117	887787	1030720	946113
m1422	10.339	1125.51	Unknown	28507064	7403870	5796358	4893194	4517640	3926416	43815424	39611552	46498144	371250	268868	423629	6427539	4997040	7280889	4179059	5091359	3479529	6696220	7270426	6145352	8556048	14120141	14418248	55102332	54701584	62894852	221814	121553	233057	7858724	7806142	7603970	17368668	11154652	14939560	12630600	16924064	18711126	21313296	20232684
m1423	11.916	1125.53	Unknown	38913						338553	120883	300836										2047265	4677069	4689778	3369			329707	143606	281979							5030	26989	668	110217	163993	139273	166033	143131
m1424	11.957	1127.58	w/o MS2:Furostane base + O-Hex, O-Hex-Hex-Hex; PlaSMA ID-2309			2393																43273	125589	128976
m1425	9.766	1129.03	Unknown	3350						695188	909736	792888				658	20752					3236	2960	1386			23787	67459	212742	131090			19411							107440	111961	178569	103507	128447
m1426	10.322	1130.53	Unknown	177306	25573	25131				769300	407668	726296				21630	20336					62244	80624	39531	1333	34965	24988	330462	464370	416774							170393	87250	151486	76286	103355	14200	39844	149941
m1427	9.263	1131.46	Unknown	26600	2816	4360	16374	24003	57682	349139	269971	389074				100032	159586	113303	105878	46778	64631	35479	5061	17263	28867	17614	28308	69855	54370	36371					18521	9189	24398	23691	18429	63143	74998	48950	58405	32318
m1428	10.271	1131.51	Unknown	301014	55439	51065				787080	763998	1002302				177652	81941	45622			17090	102708	22576		107598	259167	271935	720110	590986	727454					34188		235025	130099	152889	331751	205633	402981	411376	254886
m1429	9.263	1131.53	Unknown	384664	148489	107165	317864	362155	487482	3578501	2632399	3326596				1018960	1208673	1223222	784715	551618	740013	221484	200031	135050	417435	236632	382298	680474	612328	622436				119051	218423	205145	589462	268801	344106	746843	776220	777652	742453	585548
m1430	9.487	1133.53	Unknown	658886	98260	41545	214579	193374	241779	2020591	1916306	1177944				461477	520889	387067	306988	273361	366008	570221	226548	299392	710888	581435	756914	1113087	1379144	989275				150248	316055	348054	784766	580246	403334	877351	547660	777961	554313	523223
m1431	10.218	1135.53	Unknown	286096	134185	75045	60713	28328	18967	1257420	1613021	1803358				100674	102469	136802	60053	89349		317036	417595	302792	201740	663762	406457	796580	1100664	1142062				161997	257586	151871	556334	349747	727402	308568	262247	405983	310764	246628
m1432	9.432	1137.49	Unknown	2170547	515766	399071	2112065	2443158	2719319	11287965	10522332	13993780		33495	25466	4533720	3688713	4228934	3481980	2172175	2616698	606334	448643	360063	1554055	1947713	2705347	3316741	3289669	3704979				841157	1537359	1307254	3947282	1316068	1526224	1841034	2382944	3036435	3352969	3019121
m1433	10.275	1137.52	Unknown	628012	374898	2398	34558	2709	1580	1165974	1053560	1419629				61270	43080	36057	33175	86472	72568	552990	345491	500902	227619	305509	313053	1187078	1735348	872180				71090	112001	127549	507720	351178	490332	599223	504643	629230	434193	442112
m1434	11.635	1137.53	Unknown					22063	118427	672092	291975	599077				37966	29128	32827	17115	15464	28902	5579	8799	19966		11683		3103	3467	542							13442			299432	710838	425588	550328	480183
m1435	10.571	1137.57	Unknown	77899	103006	39403				392052	471623	111018				705	61092			85437	45769	371236	299665	423762	362894	237334	169336	916299	857752	654680				84781	53570	56578	99330	202397	346316	85967	351235	517162	260662	249278
m1436	9.39	1137.58	Unknown	29305						183372	111148	171526				58223	44177	55552	33778		37350							32005	34373	33076							41702				17515	50149	25529	16812
m1437	10.292	1139.02	Unknown	727928	289193	91090	59388	30003	45236	1131136	1529594	1832359				116319	141835	97646		10173		409459	444405	284026	180631	107284	362520	143747	824048	1502962				99895		46784	369141	90229	324170	369479	693570	697480	851435	508727
m1438	9.495	1139.48	Unknown	2439775	294049	513528	1616213	1845991	2149568	9228531	8159130	10654826		22210	7410	3517864	2852613	3674231	2732326	1877854	2077040	362709	697528	699866	858723	1268198	1967128	2349807	4524612	4854820				599205	1073486	897850	2361021	922645	1113333	2157526	1605159	3201615	1005467	3033919
m1439	9.716	1139.5	Unknown	1389168	283724	644922	649837	762108	905293	4391340	3569368	4543974	12145	12705	40072	1516612	1202524	1595552	1242045	766472	970961	1513525	612977	640640	2248822	3829586	5362162	5205871	5812098	6256148				1597352	3101046	2569372	6565118	2327480	3402329	1113471	3159565	1715352	4038889	3579072
m1440	11.683	1139.5	Unknown	50754			51660	82878	137725	558726	488037	225210		21844		133884	176703	57807	166909	78240	136403	39041	10704	81683	63045		111910	136731	192449	121502					73591	67175	378371	119939	173041	191832	260726	296013	95034	303300
m1441	9.753	1141.51	Unknown	1007095	121749	105954	452623	570486	704387	3167128	2906908	3292476	11005	7831	9752	990837	932512	964446	869021	555212	656742	642373	182826	114490	912761	1425173	2067976	1746598	2194370	2265273				612324	1317836	1041897	2785805	834770	1241536	658311	1136755	1308370	1331915	1450643
m1442	10.21	1144.53	Unknown					47071	62757	682806	898304	658704				12665	49165	1493		87387						2125	23620	2315	13472	9830					1643	1350	3423		1712	107998	233324	175326	25412	26819
m1443	6.293	1145.31	Unknown	382434	490947	495011					3195		61808	74837	53560															6659							11696				6706
m1444	10.236	1145.54	Unknown	2444456	654865	303428	77119	63153	134342	11443387	10552459	9862760				373456	389931	395550	55738	301986	153861	493776	761800	974460	971141	887091	639999	3760694	3451332	3905834				235132	570407	248593	1021871	2082737	1381112	3090739	2852942	3584417	2754451	2615796
m1445	10.329	1146.04	Unknown	3192856	1196126	593497	229748	159402	144006	12531206	11317372	11313927				456294	596272	479468	239616	421560	209127	733664	641832	726803	1275851	1236073	1043608	4907403	5067474	4701617				422413	185116	563860	705078	2798872	1943054	3407627	3546096	3625834	3468422	3461957
m1446	6.252	1147.3	Unknown	171550	171654	132405							3042											11278											38416					6280
m1447	10.344	1147.47	Unknown	298012	145729	127900	175896	169408	92956	196835	92786	298863				141244	143458	294127	56413	199425	55403	39994	91037	160662	66419	152424	222700	179034	90800	157298				252191	234537	236723	251539	155087	179839	196275	162034	189223	166436	213122
m1448	5.633	1151.32	Unknown	787	1329	844																209541	302167	78913	210257	31818	284366	209880	68641	259143				137452	271133	310963	425093	411390	383454			25743	27977
m1449	10.227	1153.46	Unknown	669426	302222	231980	139237	173306	99467	1395500	1630187	1796250	12618	12797	18803	301429	284864	328437	146802	223162	226286	377864	422186	275264	204199	578109	498658	1114873	1477315	1556799				261730	236690	209513	542507	243098	509617	433917	499687	570437	533137	494139
m1450	9.127	1153.48	Unknown	159182			11527	50973	157467	774096	626478	1666192				275402	293770	350895	287374	97192	132586	27296		3527	70561	88455	102461	209180	344390	327550					90970		297509	60940	40393	103324	176864	140374	207723	216795
m1451	10.218	1153.51	Unknown	5361434	2448184	1606535	967936	842437	679483	11837230	13889692	16059752	104091	63286	87159	2060272	1816200	2165885	916365	1356511	1293931	2985344	3234104	2399402	1653683	4441956	3847719	10311544	12953557	13491623			46465	1935518	1792152	1515777	3987194	1962267	4000826	3296570	3486020	3953781	4452330	4173776
m1452	10.226	1153.58	w/o MS2:Ginsenoside Rb1; PlaSMA ID-2316	328583	144945	357148	155919	150432	123110	870398	932129	1270803			10243	361277	78258	85586	174231	219422	255916	197891	236756	170316	108956	295166	223220	726088	933971	934680				110735	93646	350477	243553	110750	243232	186738	245748	313358	309976	309253
m1453	10.314	1153.96	Unknown	66801	27834		29901	21534	29559	76312	160191	182861					28754	37253		18892	14514	33032	19549	10470		103892	38213	66034	59244	81929				92931	42700	111986	108953	141822	112503	16001	18488	102485	120122	95917
m1454	10.23	1154.53	Unknown	4335710	1828166	908309	622393	465598	348321	8799839	9635212	11093812	42571	21339	49684	1383601	832609	1195582	564183	909679	577209	1919842	2604686	2128480	3153418	4242856	3748702	20714626	21840130	22955660	25248	17453		1755429	1177988	1288118	3514819	3583823	4007029	3725625	3204017	4407738	3462000	4313894
m1455	10.333	1155.04	Unknown	1938804	463609	128929	67402			3303230	3591190	3382574				36640	126917	131177	25026	79820	58936	726954	851869	694528	2622439	2169354	1740766	19058876	18711044	20087456				696513	755282	815328	1954624	3399210	3100496	1543937	878245	1790967	1576087	2017233
m1456	10.201	1155.46	Unknown	227330	116247	76139	36256	47806	46602	413744	584222	589448			11866	84914	65964	90141	44814	66359	49803	160679	192353	141799	61427	202414	169085	305022	340677	446291				103195	88652	76134	217841	85388	187940	156965	138493	186564	183893	145498
m1457	11.672	1155.53	Unknown	1570		12057				71273	69528	32044										1136560	2350552	2519600				14013	36784	18857									400	28704	48061	21573	40050	48584
m1458	11.672	1155.58	Unknown								8544											566122	555255	612790															604			11903	9911	11223
m1459	5.633	1157.29	Unknown																			95230	45278	133208	238393	234367	164486	183726	187253	104838				223036	254564	173918	249006	143292	279738
m1460	10.224	1160.55	Unknown	786938	246275	337968	39895			3037730	2939369	2951038				207976	125051	63803	98321	215379	48998	550601	546905	461057	292315	500409	328092	1061373	344880	1021771				231264	188120	117264	687155	539310	714508	736806	526161	801601	839949	848764
m1461	10.212	1161.55	Unknown	386574	169401	55854		39553	42326	2782640	2660266	2265935				64664	67083	76357	708	119986	54790	971794	1076268	1066775	360718	562689	392826	1179795	950891	1067165				231965	196973	103891	828442	867831	787008	614205	646352	710525	911848	696229
m1462	10.124	1162.04	Unknown	403117	121605	59471				1502604	1478241	1334665				48450	55837	92380		72749		718901	814348	856163	236790	261675	192274	773818	762219	532397				151154	97244	98437	397179	557246	516403	537768	710037	698008	717865	488055
m1463	10.311	1163.46	Unknown	34906	10475	9896			11247	134669	142686	147421				4912	8938	10071	5142	24136	13639	10908	4898	9169		16463	3843		7916	1221				13654	7536		25889	7628	17851	36765	39741	63599	58141	63249
m1464	10.3	1163.53	Unknown	491870	176406	146360	53638	39870	52909	1950268	1815819	1958154				122417	185256	129123	63749	135953	116170	170771	288269	234377	133621	264274	207072	271503	418631	695984				132050	140553	82571	392979	307639	331099	578135	637444	688237	699885	976380
m1465	10.332	1164.07	Unknown	138965	64165	40582	9668	5328	5178	442546	393335	519064				17574	19405	53848	11792	36585	19262	47577	34296	74187	23311	47296	22784	96089	76962	109996				35999		28639	105692	71546	66098	156644	137622	138628	121987	136971
m1466	10.34	1165.52	Unknown	215017	86670	97084	36401			923018	864604	771203				63347	25406	55415	41034	54907		252139	173565	154595	257330	173270	130078	112145	400530	404003				67623	116368	54956	293442	337832	314151	189423	388333	288278	396402	381904
m1467	9.262	1167.45	Unknown	144971	33735	54788	110605	113671	128925	612127	611628	774768			11060	330397	382521	356550	199252	109203	148274	59190	42948	60433	51646	65393	132189	150789	114455	139786				16169	51946	43079	110616	32866	62449	91720	164486	166527	163472	168842
m1468	9.259	1167.5	Unknown	551148	203059	341436	480965	682545	642401	3819338	3671053	4733756			38692	1481777	1473469	1651543	922537	519670	690705	298578	251608	172249	350595	414448	789937	845166	762623	824577				168498	291175	230030	695880	199142	387258	615194	954977	994559	886699	1000493
m1469	10.222	1168.56	Unknown	756610	275767	55227				1634453	1973961	1666836					62878			22579		140653	119162	156081	547334	217995	323614	4334080	3857750	3287759				101321	80519	85670	415559	874814	488431	704722	605295	453662	440130	373908
m1470	2.587	1169.33	Unknown	47893																		413930	793490	1135602	1166790	469339	1654086	571614	1560551	674722				1554900	1406369	1543173	1431349	504420	2415738	98415	65874	111845	45417	191255
m1471	2.412	1169.34	Unknown	67472																		912069	793490	1046112	466380	1625595	1293228	1611346	1607310	537230				547799	1380170	1662474	1572148	1665056	669902	154867	84666	59897	97794	67180
m1472	9.385	1169.5	Unknown	599063	134690	199350	321134	308326	529879	2933647	2748337	3468797				1253307	986168	1136923	748541	526778	554315	583178	243232	286670	609994	883864	467281	1173264	488673	1471242				262979	442385	325965	1167395	329316	602227	650920	835039	993623	903773	911151
m1473	9.494	1171.52	Unknown	181282	50457	77921	76299	51651	105661	820680	734862	1106088				279443	199330	559622	159351	92734	94098	232889	137319	81741	305470	599469	549013	472155	770613	634601				127327	180160	233628	704961	104726	215444	191053	234756	345143	256996	376345
m1474	10.342	1172.52	Unknown	488707	136755	83554	40079	55790	25416	579910	859721	490896				37921	44127	41424		68926	50849	362927	325073	295151	463354	397246	424351	1705805	1640541	2396407				244349	298221	242031	822717	580794	608885	414104	404777	461002	494292	442956
m1475	10.309	1175.54	Unknown	495753	190561	19047		23461		1235170	904693	698147				10357	66401	69030	40499	39466	76887	156105	300733	186136	139812	155850	142349	1251155	977154	987129				77613	120633	69679	198544	354123	301187	383271	505266	421611	304505	156352
m1476	9.503	1175.54	Unknown	98814						847039	623474	931966		1537									11303	6931	62529	21513	42521	496368	455284	418648					52605		198576	60154	77095	78728	63949	129838	142447	60931
m1477	9.716	1177.06	Unknown	40754	1337					944010	809513	1009514					12920					10328	31704	9511	16983	12236	96688	684379	804272	711578							78832	41855	37890	39361	21989	153885	8176	25735
m1478	10.155	1178.53	Unknown	225446	115658	87092		24882		1354236	1093079	1192185				69306	43193	60467		26313		263296	196563	169166	158386	260243	142514	269016	243961	367893				104075	54128	98562	368081	297393	436649	370142	379036	332093	246846	408175
m1479	10.086	1178.55	Unknown	217809	65921	47488		21730		1291393	995784	1082734				53723	32605	35869		17117		241382	174700	166567	144529	260243	165993	889694	884256	1066182				100590	47432	98562	272526	317560	456342	320801	397327	419168	391929	317939
m1480	10.128	1180.06	Unknown	664972		25656	54365	65806		1404944	1223403	1252259						28209		25721	23112	364687	278519	389358	315737	453146	437779	1870146	2594518	3026048				576022	479670	401490	1975768	1745577	2022260	450444	714378	644802	731800	718893
m1481	10.224	1185.51	Unknown	291211	121845				40970	476316	432578	335423				46769	68218	78689	6601	63853	44704	92012	85198	94258	325483	184815	166814	665942	625026	396283				81254	114179	92783	123139	284511	163109	277998	232969	233115	153938	182320
m1482	10.338	1185.52	Unknown	330058	121845				40970	476316	432578	395845				46769	68218	78689	23473	63853	44704	92012	85198	94258	441710	184815	158014	665942	521554	386791				81254	114179	92783	123139	284511	161344	298864	232969	233115	153938	194206
m1483	10.218	1187.05	Unknown	886868	293400	148019	110878	15135	62298	1610056	1429497	1564862	3995			83540	40382	54390	42573	91652	36627	138441	154165	173936	306084	401607	488536	2078505	2073889	2396518				212294	237428	177494	864511	633564	696922	438815	656862	579226	664697	575510
m1484	6.862	1187.32	Unknown	311851	369744	322350							11286	28210	53907							953														1295		846					4375
m1485	5.794	1187.34	Unknown	7046																		938784	862749	767761	1341728	889957	970926	1048090	1020669	1054894				1385811	921260	1006857	1006036	1232616	1434278	165072	150051	107046	99549	102515
m1486	5.854	1187.34	Unknown	7046																		942216	709064	329854	778368	1015192	783530	767662	1020669	1082617				1222559	1117314	346207	671408	900433	1434278	165072	150051	107046	99549	102515
m1487	11.916	1187.53	Unknown																			135228	291739	355354
m1488	10.137	1188.56	Unknown	884290	99150		38245			665102	670464	753717					667	19639				422693	173340	288171	660835	613828	593819	1360507	1435712	1859796				419677	467485	269586	1102716	971665	1123356	436560	693583	465882	915928	488742
m1489	10.399	1189.53	Unknown	19681	44098			4357		125552	368543	221655							3040	5001	21096	356444	342121	349737	13194	49472	13153	9758	83625	80852				3301	35277		123558	90707	75752	110045	59657	185181	59087	81108
m1490	12.16	1189.53	Unknown																			1332668	3094501	3310195		2825														33007
m1491	9.412	1190.55	Unknown	389540	82689		26980			5777246	5336907	5676479			405	176085	191679	199221		179507	71097	109804	68984		51706		41036	776273	597927	656648							59107	25883	53677	626910	494930	514769	627171	778457
m1492	10.959	1190.65	Unknown	112718		39770		26522		1415562	1311487	1243714							46151	144075	59295	85471	71158	308202				63421	67360	93832										262380	235436	328520	325556	312179
m1493	10.144	1193.56	w/o MS2:Furostane base -2H + O-Hex, O-Hex-dHex-dHex-dHex; PlaSMA ID-2323	36933	51267			24274		528637	343038	958153							21918	26405		26000	20214	25908	137078	21554		540264	257970	299888				22312		59767	93519	309016	97928	47425	67363	88420	19274
m1494	9.243	1201.38	Unknown		22530																	218387	321841	174028	323545	110340	326304	366050	408345	215054				416396	364881	329766	359893	392928	429778	19304
m1495	9.634	1203.05	Unknown	154576		6123	79351	69971	129133	1119245	972080	1068659				36182			129907	90814	164709	233493	163687	68120	50093	36963	114379	213276	249047	308784				26775	69172	50501	232400	93332	97975	130478	440438	397489	549281	286840
m1496	5.206	1203.32	Unknown	5707									1167								633	223968	131424	179812	484423	162960	219597	150827	613653	492071				425479	429930	246895	319249	729027	447930			23408	13204	28493
m1497	10.24	1203.44	Unknown	21201	15086					191289	192075	167779				21993				11216		15709	24805			34884	15536		80405	581				36241	30766		38070	21371	18467	53435	46636	54725	54314	53416
m1498	10.249	1203.54	Unknown	3065862	1151644	983457	439808	539983	409718	11013240	9892031	10268135	85651		66753	754082	537285	769101	650237	1001518	818469	1831057	2136191	1610249	1174206	1588476	1214540	5498638	5079070	5885138				1057860	905745	854940	2675377	2060451	2461410	2732950	2502205	3086480	3140375	2945050
m1499	12.079	1203.55	Unknown								23345	17411										144955	448974	409985													2274
m1500	10.215	1205.04	Unknown	225691						952302	582341	727444						14954		73877		193079	198924	153296	37714	153013	194941	186476	245084	433494				121499	33063	81018	337796	225436	290524	120229	234429	326562	358522	201298
m1501	5.262	1205.34	Unknown	279165										7409								1186797	1183112	1100413	2009518	2308700	1562580	1877303	1955759	1579159				2289389	1977663	2158344	2015250	2539270	2183409	380425	251406	382152	229044	76497
m1502	11.794	1205.55	w/o MS2:Chrysanthellin B																			2890906	5785214	6241392				26715	56608											23972	25910	32809	33337	58162
m1503	10.29	1205.55	w/o MS2:Chrysanthellin B	967553	233772	226601	139492	120901	60370	2930854	2623590	2928594				206981	165638	138370	174268	244226	153686	662779	785494	703198	541781	556766	405082	2075972	1683960	2192687				551151	614893	409854	1379658	1307175	1350434	913248	963363	849034	973527	1337748
m1504	9.919	1214.06	Unknown	44761						339016	271737	364787	767					3929				34639	81686	14084		21712	7216	99399	176021	193583				15329	10902		48108	40205	37551	24038	72232	25554	46923	87773
m1505	9.39	1217.53	Unknown	145412	31330	38238	78643	72011	177367	1270085	1216486	1531490				287086	332729	274742	346072	216406	324700	87813	1102	45828	54212	91405	64933	172544	231887	113622					43390	24705	256396	38489	80510	218781	199377	207957	247779	260912
m1506	10.017	1219.56	Unknown	489331	220473	178865		14324		1367794	1583750	1466532	23134		40001	11889	8025	21261	52910	142347	14224	847994	816541	887325	259092	359512	342413	1094672	950126	1043152				176929	118462	183863	761318	514183	491022	472398	526591	672739	489467	516740
m1507	10.134	1220.06	Unknown			31333	38489	3073		726925	665662	516349										312615	449681	367965	26520	143728	56685	240673	253237	364194				117595	68089	99553	233805	275806	331480	176083	202982	159401	150107	192938
m1508	9.876	1220.54	Unknown	239904	97021	129921			704	1478341	965680	1086859		20955		93548	52299	133784	96802	2994		135565	106740	135528	104469	82422	115399	367584	560532	402415	589			41442	39673	61906	331879	125812	163300	267899	209887	440794	164200	389952
m1509	10.344	1221.55	Unknown	2078076	737920	508565	265923	254224	208783	3230531	3913134	3473999	36905			319341	271522	339395	212076	318883	158333	2100817	2120444	2074255	3719928	3373624	3012560	15815850	15300304	16562307				1861364	1775292	1584372	3539744	4333294	4579069	1762028	1895334	2089993	1998705	2535869
m1510	10.075	1227.56	w/o MS2:Digitonin	113626	18548					331610	305452	565332								54878		176246	149628	193987	285681	221248	181484	881198	908577	1121378				180944	106342	111204	371495	562797	547005	260431	235289	185377	301312	289174
m1511	5.772	1229.35	Unknown																			353667	435899	331231	851160	500688	617321	522357	589929	667967				743061	672914	674832	497822	794200	908586	25657	7842	27771
m1512	10.127	1233.55	Unknown	478438	333045	306256	64809	96074	92884	2860032	2925986	2754710				223285	175913	237108	146185	267439	223995	1052360	787079	1141850	190960	287663	203419	585352	737851	677606				88814	117894	128387	255164	224384	292234	808326	662078	621516	723664	611345
[truncated: 14 more rows]

## Sheet: Table_S5
Table S5	The standardization of the method using three aralosides A, B, C, previously identified for Aralia elata extracts
[truncated: 31 more rows]
